# Supplementary material for: The Hmr and Lhr Hybrid Incompatibility Genes Suppress a Broad Range of Heterochromatic Repeats
Source: PLoS Genet. 2014 Mar 20;10(3):e1004240. doi: 10.1371/journal.pgen.1004240 (PMC3961192; doi:10.1371/journal.pgen.1004240)
Supplement: Table S3 — DEG-seq output measuring the statistical significance of the differences in TE expression between Hmr− and Hmr−/Hmr+ ovaries based on reads uniquely mapped with no mismatches to either the individual-insertion or consensus-sequence TE databases. (XLSX) [file pgen.1004240.s008.xlsx]

## Sheet: insertions
Transposable Element	value1 (Hmr–)	value2 (Hmr+)	Normalized Fold Change	log2(Fold_change)	log2(Fold_change) normalized	p-value	q-value(Benjamini et al. 1995)	q-value(Storey et al. 2003)	Signature(p-value < 0.001)
BATUMI	6596	470	13.2829	3.81086	3.7315	0	0	0	TRUE
COPIA	27183	7366	3.49281	1.88375	1.80439	0	0	0	TRUE
HETA	59955	1330	42.6661	5.49438	5.41502	0	0	0	TRUE
NonTE	54504296	51804730	0.995797	0.0732861	-0.00607661	0	0	0	TRUE
PROTOP_A	3456	283	11.5584	3.61023	3.53087	0	0	0	TRUE
TART	124480	3480	33.8555	5.16068	5.08132	0	0	0	TRUE
Unassigned	26427	12945	1.93221	1.02962	0.950255	0	0	0	TRUE
FW	2829	690	3.88055	2.03562	1.95626	3.4893e-280	1.02934e-278	1.02934e-278	TRUE
GYPSY12	1988	342	5.50174	2.53925	2.45989	3.64006e-262	9.54505e-261	9.54505e-261	TRUE
DVIR.6.62.PILER-DF.CENTROID	1307	251	4.92846	2.3805	2.30114	5.33392e-160	1.25881e-158	1.25881e-158	TRUE
GYPSY8	1072	163	6.22467	2.71736	2.638	1.0006e-153	2.14673e-152	2.14673e-152	TRUE
R1	893	129	6.55196	2.79129	2.71193	2.90995e-132	5.7229e-131	5.7229e-131	TRUE
3S18	3307	1618	1.93448	1.03131	0.951949	3.93335e-111	7.14054e-110	7.14054e-110	TRUE
ACCORD	496	32	14.6704	3.9542	3.87483	7.9857e-103	1.34616e-101	1.34616e-101	TRUE
TRANSPAC	724	125	5.48199	2.53406	2.4547	2.8288e-96	4.45065e-95	4.45065e-95	TRUE
BLOOD	2423	1165	1.96851	1.05646	0.977102	2.16916e-85	3.19951e-84	3.19951e-84	TRUE
CR1	1432	549	2.46877	1.38315	1.30379	3.00438e-80	4.17078e-79	4.17078e-79	TRUE
MAX	2154	1023	1.99287	1.07421	0.994849	2.37031e-78	3.10774e-77	3.10774e-77	TRUE
NINJA	681	170	3.79147	2.00212	1.92276	2.80002e-67	3.47792e-66	3.47792e-66	TRUE
RT1	182446	182687	0.945227	-0.00190445	-0.0812672	3.75565e-65	4.43167e-64	4.43167e-64	TRUE
CIRCE	203	15	12.809	3.75845	3.67908	4.00447e-41	4.50026e-40	4.50026e-40	TRUE
INVADER3	533	181	2.78714	1.55815	1.47878	5.10801e-37	5.4795e-36	5.4795e-36	TRUE
BS	235	43	5.1726	2.45025	2.37089	4.7208e-31	4.84395e-30	4.84395e-30	TRUE
BARI1	468	166	2.66838	1.49533	1.41596	9.59014e-31	9.4303e-30	9.4303e-30	TRUE
DIVER	2675	1786	1.41759	0.582807	0.503444	1.09147e-30	1.03035e-29	1.03035e-29	TRUE
1731	1058	560	1.78816	0.917841	0.838478	6.14532e-30	5.57806e-29	5.57806e-29	TRUE
HELENA	116	3	36.5971	5.27302	5.19366	9.61369e-30	8.40308e-29	8.40308e-29	TRUE
FW2	113	4	26.7379	4.82018	4.74082	9.41358e-28	7.9343e-27	7.9343e-27	TRUE
STALKER2	1499	924	1.53546	0.698036	0.618673	2.99735e-25	2.43922e-24	2.43922e-24	TRUE
FLEA	2030	1426	1.34737	0.509506	0.430143	4.05995e-18	3.19383e-17	3.19383e-17	TRUE
BS2	261	99	2.49525	1.39855	1.31919	3.99699e-16	3.04287e-15	3.04287e-15	TRUE
NOMAD	574	310	1.75251	0.888783	0.80942	4.55122e-16	3.35653e-15	3.35653e-15	TRUE
GYPSY4	167	46	3.43612	1.86014	1.78078	5.81032e-16	4.15526e-15	4.15526e-15	TRUE
BURDOCK	335	151	2.0998	1.14961	1.07025	4.63124e-15	3.21463e-14	3.21463e-14	TRUE
COPIA2	372	180	1.95605	1.04731	0.967943	2.97847e-14	2.00834e-13	2.00834e-13	TRUE
TIRANT	2207	1662	1.25684	0.409166	0.329804	1.58146e-12	1.03673e-11	1.03673e-11	TRUE
IDEFIX	175	63	2.6291	1.47393	1.39457	4.35529e-12	2.77797e-11	2.77797e-11	TRUE
QUASIMODO	365	197	1.75362	0.889701	0.810338	1.0939e-10	6.79372e-10	6.79372e-10	TRUE
IVK	104	28	3.51548	1.89308	1.81372	1.20884e-10	7.31503e-10	7.31503e-10	TRUE
176	954	657	1.37433	0.538096	0.458733	2.67135e-10	1.5761e-09	1.5761e-09	TRUE
GYPSY3	70	13	5.09641	2.42884	2.34948	3.85334e-10	2.21802e-09	2.21802e-09	TRUE
MICROPIA	121	39	2.9365	1.63346	1.5541	5.13118e-10	2.88323e-09	2.88323e-09	TRUE
DOC2	145	55	2.49525	1.39855	1.31919	1.61614e-09	8.86998e-09	8.86998e-09	TRUE
INVADER2	202	94	2.03392	1.10362	1.02426	4.53923e-09	2.43468e-08	2.43468e-08	TRUE
GTWIN	165	70	2.23098	1.23704	1.15768	6.21082e-09	3.25723e-08	3.25723e-08	TRUE
RT1B	277	147	1.78349	0.91407	0.834707	7.98749e-09	4.09793e-08	4.09793e-08	TRUE
PROTOP	199	96	1.96197	1.05166	0.972299	2.48614e-08	1.24836e-07	1.24836e-07	TRUE
dyak.group.1	3160	2588	1.15567	0.288087	0.208724	4.6341e-08	2.27843e-07	2.27843e-07	TRUE
G5	88	28	2.97464	1.65208	1.57271	7.25228e-08	3.49294e-07	3.49294e-07	TRUE
S2	121	54	2.12081	1.16398	1.08461	2.22331e-06	1.0494e-05	1.0494e-05	TRUE
GYPSY9	34	5	6.43603	2.76553	2.68617	3.21614e-06	1.48825e-05	1.48825e-05	TRUE
DVIR.3.94.PILER-DF.CENTROID	85	32	2.51408	1.40939	1.33003	4.24054e-06	1.92455e-05	1.92455e-05	TRUE
PROTOP_B	477	328	1.37643	0.540293	0.460931	7.32228e-06	3.26049e-05	3.23226e-05	TRUE
TRANSIB2	68	23	2.79828	1.5639	1.48454	7.39585e-06	3.23226e-05	3.23226e-05	TRUE
INVADER6	94	39	2.28125	1.26919	1.18982	7.67915e-06	3.29505e-05	3.29505e-05	TRUE
BAGGINS1	55	17	3.06213	1.6939	1.61453	1.60596e-05	6.76799e-05	6.76799e-05	TRUE
POGO	327	213	1.45304	0.618437	0.539074	1.94314e-05	8.04528e-05	8.04528e-05	TRUE
G2	49	14	3.31266	1.80735	1.72799	2.17644e-05	8.85588e-05	8.85588e-05	TRUE
DANA.89.131.PILER-DF.CENTROID	23	2	10.8845	3.52356	3.4442	2.26059e-05	9.04238e-05	9.04238e-05	TRUE
HMSBEAGLE	1261	998	1.1959	0.337457	0.258094	2.31223e-05	9.09476e-05	9.09476e-05	TRUE
GYPSY2	60	20	2.83943	1.58496	1.5056	2.51109e-05	9.71505e-05	9.71505e-05	TRUE
OSVALDO	41	10	3.88055	2.03562	1.95626	2.96125e-05	0.000112719	0.000112719	TRUE
HOBO	281	179	1.48581	0.650611	0.571248	3.14949e-05	0.000117981	0.000117981	TRUE
P_DG	144	78	1.74734	0.884523	0.80516	5.27356e-05	0.000194463	0.000194463	TRUE
GYPSY6	78	33	2.23712	1.24101	1.16165	5.8528e-05	0.000212502	0.000212502	TRUE
ZAM	35	8	4.14083	2.12928	2.04992	8.53886e-05	0.000305329	0.000305329	TRUE
INVADER1	66	26	2.40259	1.34395	1.26459	9.35585e-05	0.00032955	0.00032955	TRUE
BS3	27	5	5.11097	2.43296	2.3536	0.000133622	0.000463746	0.000463746	TRUE
GYPSY6A	22	3	6.94082	2.87447	2.79511	0.000177376	0.000606678	0.000606678	TRUE
M4	52	19	2.59035	1.45251	1.37315	0.000200473	0.000675881	0.000675881	TRUE
GYPSY7	47	16	2.78027	1.55459	1.47523	0.00020964	0.000696833	0.000696833	TRUE
MDG1	840	664	1.19735	0.339206	0.259843	0.000542971	0.00177974	0.00177974	TRUE
GYPSY16-I_AG	17	2	8.04504	3.08746	3.0081	0.000787836	0.00254698	0.00254698	TRUE
INVADER4	91	49	1.75774	0.893085	0.813722	0.00126453	0.00403281	0.00398104	FALSE
GYPSY12A	50	21	2.25351	1.25154	1.17218	0.00126516	0.00398104	0.00398104	FALSE
OJ.8.5.PILER-DF.CENTROID	41	71	0.546556	-0.792195	-0.871558	0.00176925	0.00549398	0.00549398	FALSE
LOOPER1	2	14	0.135211	-2.80735	-2.88672	0.00186345	0.00571135	0.00571135	FALSE
DOC6	74	38	1.84314	0.961526	0.882163	0.00233635	0.00706894	0.00706894	FALSE
412	3870	3922	0.933927	-0.019256	-0.0986187	0.00257155	0.00768211	0.00768211	FALSE
XDMR	175	116	1.42787	0.59323	0.513867	0.00276218	0.00814844	0.00814844	FALSE
DOC4	40	16	2.36619	1.32193	1.24257	0.00297994	0.0086823	0.0086823	FALSE
DIVER2	136	86	1.49675	0.661198	0.581835	0.00379026	0.0109085	0.0109085	FALSE
G3	14	2	6.62533	2.80735	2.72799	0.00439517	0.0124971	0.0124971	FALSE
DVIR.26.43.PILER-DF.CENTROID	204	250	0.772324	-0.293359	-0.372722	0.00642231	0.0180436	0.0180436	FALSE
G4	45	21	2.02816	1.09954	1.02017	0.00655197	0.0181914	0.0181914	FALSE
DOC5	30	11	2.5813	1.44746	1.3681	0.00713401	0.019577	0.019577	FALSE
ROO	27811	26926	0.977584	0.0466557	-0.032707	0.00800833	0.0217237	0.0217237	FALSE
dvir.group.8	31	12	2.44506	1.36923	1.28987	0.0087098	0.0233581	0.0233581	FALSE
TOM	16	4	3.7859	2	1.92064	0.0124354	0.0329747	0.0329747	FALSE
ROOA	2364	2404	0.930727	-0.0242069	-0.10357	0.013233	0.0346998	0.0343592	FALSE
DOC3	108	70	1.46028	0.625604	0.546242	0.0133187	0.0345407	0.0343592	FALSE
ULYSSES	12	2	5.67885	2.58496	2.5056	0.0133943	0.0343592	0.0343592	FALSE
G5A	248	291	0.806618	-0.230679	-0.310042	0.0139744	0.0354618	0.0354618	FALSE
GYPSY5	83	51	1.54034	0.702614	0.623251	0.0153848	0.0386256	0.0386256	FALSE
DANA.60.77.PILER-DF.CENTROID	44	66	0.630984	-0.584963	-0.664325	0.0172096	0.0427523	0.0427523	FALSE
S	62	36	1.63004	0.784271	0.704909	0.0199318	0.048999	0.0488136	FALSE
AGAM.110.111.PILER-DF.CENTROID	263	200	1.24462	0.395063	0.3157	0.0200632	0.0488136	0.0488136	FALSE
J1	45	24	1.77464	0.906891	0.827528	0.0221849	0.053425	0.053425	FALSE
dmow.group.6	306	346	0.837056	-0.17724	-0.256603	0.0254652	0.0607049	0.0607049	FALSE
DVIR.35.83.PILER-DF.CENTROID	16	5	3.02872	1.67807	1.59871	0.0277807	0.0655625	0.0655625	FALSE
OJ.10.24.PILER-DF.CENTROID	4	12	0.315492	-1.58496	-1.66433	0.0441799	0.103232	0.103232	FALSE
OJ.0.90.PILER-DF.CENTROID	68	89	0.72315	-0.388271	-0.467633	0.0459235	0.106254	0.106254	FALSE
TABOR	109	76	1.35745	0.520257	0.440894	0.0467617	0.107143	0.107143	FALSE
DVIR.30.66.PILER-DF.CENTROID	145	107	1.28261	0.438442	0.359079	0.0509287	0.115569	0.115569	FALSE
G6	11	3	3.47041	1.87447	1.79511	0.0586675	0.131862	0.131862	FALSE
HETRP	23	11	1.97899	1.06413	0.984768	0.0608032	0.135373	0.135373	FALSE
OJ.0.51.PILER-DF.CENTROID	127	151	0.796042	-0.24972	-0.329083	0.0627576	0.138419	0.138294	FALSE
agam.group.17	1270	1294	0.928921	-0.0270091	-0.106372	0.0632869	0.138294	0.138294	FALSE
TRANSIB3	110	132	0.78873	-0.263034	-0.342397	0.0716184	0.155064	0.155064	FALSE
agam.group.37	1905	1698	1.06186	0.165955	0.0865918	0.0745238	0.159888	0.159888	FALSE
DYAK.13.30.PILER-DF.CENTROID	26	13	1.89295	1	0.920637	0.0767226	0.163122	0.163122	FALSE
dpse.group.3	10	3	3.15492	1.73697	1.6576	0.0938693	0.197796	0.197796	FALSE
AGAM.215.326.PILER-DF.CENTROID	40	54	0.701093	-0.432959	-0.512322	0.0985482	0.205818	0.205818	FALSE
R2	69	84	0.777462	-0.283793	-0.363156	0.124865	0.258493	0.258493	FALSE
JOCKEY2	19	10	1.7983	0.925999	0.846637	0.140329	0.28798	0.28798	FALSE
dana.group.4	35	22	1.50576	0.669851	0.590489	0.145484	0.295986	0.295986	FALSE
G	128	100	1.21149	0.356144	0.276781	0.164066	0.330937	0.330937	FALSE
GYPSY10	101	78	1.22556	0.372809	0.293447	0.17923	0.358461	0.357869	FALSE
DANA.77.110.PILER-DF.CENTROID	10	4	2.36619	1.32193	1.24257	0.181874	0.36069	0.357869	FALSE
HELITRON	34	22	1.46274	0.628031	0.548668	0.181967	0.357869	0.357869	FALSE
DYAK.20.48.PILER-DF.CENTROID	132	147	0.849896	-0.155278	-0.234641	0.187618	0.365932	0.365932	FALSE
DYAK.10.18.PILER-DF.CENTROID	45	56	0.760561	-0.315502	-0.394865	0.195503	0.378187	0.378187	FALSE
dmow.group.3	5	10	0.473238	-1	-1.07936	0.199965	0.383672	0.383672	FALSE
ACCORD2	25	15	1.57746	0.736966	0.657603	0.205255	0.390647	0.390647	FALSE
RT1C	57	68	0.793369	-0.254573	-0.333936	0.210704	0.39781	0.397688	FALSE
DSIM.8.8.PILER-DF.CENTROID	11	5	2.08225	1.1375	1.05814	0.212882	0.398732	0.397688	FALSE
MDG3	15	8	1.77464	0.906891	0.827528	0.21401	0.397688	0.397688	FALSE
FW3	36	25	1.36292	0.526069	0.446706	0.250664	0.462162	0.462162	FALSE
R2B	7	12	0.552111	-0.777608	-0.85697	0.253277	0.463359	0.463359	FALSE
I	180	150	1.13577	0.263034	0.183672	0.270711	0.491444	0.491444	FALSE
dana.group.6	2	5	0.37859	-1.32193	-1.40129	0.276661	0.498413	0.498413	FALSE
TRANSIB4	36	26	1.3105	0.469485	0.390123	0.31147	0.55687	0.55687	FALSE
GYPSY	73	81	0.852997	-0.150025	-0.229388	0.334258	0.59312	0.59312	FALSE
dpse.group.2	17	22	0.731368	-0.371969	-0.451332	0.341662	0.601734	0.601734	FALSE
TOM1	197	168	1.10986	0.229734	0.150372	0.34594	0.604755	0.604755	FALSE
GYPSY11	44	51	0.816567	-0.212994	-0.292356	0.356035	0.617826	0.617826	FALSE
SPRINGER	641	576	1.05328	0.154256	0.0748928	0.374077	0.644395	0.643468	FALSE
5S	4	7	0.540843	-0.807355	-0.886718	0.376265	0.643468	0.643468	FALSE
dvir.group.5	8	4	1.89295	1	0.920637	0.389885	0.661964	0.661964	FALSE
META1	15	20	0.709857	-0.415037	-0.4944	0.39821	0.671269	0.671269	FALSE
DOC	109	92	1.12137	0.244622	0.16526	0.438066	0.733216	0.733163	FALSE
OJ.0.99.PILER-DF.CENTROID	2	4	0.473238	-1	-1.07936	0.44114	0.733163	0.733163	FALSE
OJ.9.60.PILER-DF.CENTROID	68	74	0.869734	-0.121991	-0.201353	0.450044	0.74273	0.734111	FALSE
DPSE.34.75.PILER-DF.CENTROID	5	2	2.36619	1.32193	1.24257	0.454365	0.739518	0.734111	FALSE
dvir.group.4	5	2	2.36619	1.32193	1.24257	0.454365	0.739518	0.734111	FALSE
TLD2	5	2	2.36619	1.32193	1.24257	0.454365	0.739518	0.734111	FALSE
DANA.95.145.PILER-DF.CENTROID	10	6	1.57746	0.736966	0.657603	0.457264	0.734111	0.734111	FALSE
RP1	7	10	0.662533	-0.514573	-0.593936	0.47119	0.751358	0.751358	FALSE
TART_B1	1165	1136	0.970637	0.0363671	-0.0429956	0.478336	0.757633	0.757633	FALSE
DANA.135.241.PILER-DF.CENTROID	89	75	1.12315	0.246915	0.167552	0.482518	0.759161	0.759161	FALSE
MARINER2	114	98	1.101	0.21818	0.138817	0.492874	0.77032	0.77032	FALSE
RPR	6	3	1.89295	1	0.920637	0.509299	0.790754	0.790754	FALSE
dere.group.2	4	6	0.630984	-0.584963	-0.664325	0.538978	0.831364	0.831364	FALSE
OJ.50.94.PILER-DF.CENTROID	39	32	1.15352	0.285402	0.206039	0.555722	0.851626	0.851227	FALSE
OJ.0.34.PILER-DF.CENTROID	261	234	1.05568	0.157541	0.0781785	0.559069	0.851227	0.851227	FALSE
DYAK.3.1.PILER-DF.CENTROID	62	52	1.12849	0.253757	0.174394	0.574241	0.868723	0.868723	FALSE
OJ.24.31.PILER-DF.CENTROID	7	9	0.736148	-0.36257	-0.441933	0.621485	0.934206	0.934206	FALSE
MINOS	8	10	0.757181	-0.321928	-0.401291	0.640621	0.956877	0.956877	FALSE
dana.group.25	12	9	1.26197	0.415037	0.335675	0.666159	0.988764	0.988764	FALSE
DPSE.30.63.PILER-DF.CENTROID	2	3	0.630984	-0.584963	-0.664325	0.679392	0.998982	0.995879	FALSE
DANA.26.173.PILER-DF.CENTROID	2	3	0.630984	-0.584963	-0.664325	0.679392	0.998982	0.995879	FALSE
DYAK.1.33.PILER-DF.CENTROID	4	2	1.89295	1	0.920637	0.688208	1	1	FALSE
HELITRON1_AG	80	81	0.934791	-0.0179219	-0.0972846	0.693827	1	1	FALSE
DVIR.32.76.PILER-DF.CENTROID	15	12	1.18309	0.321928	0.242565	0.704033	1	1	FALSE
SAR	56	57	0.929871	-0.0255351	-0.104898	0.707699	1	1	FALSE
OJ.0.64.PILER-DF.CENTROID	39	33	1.11856	0.241008	0.161645	0.723847	1	1	FALSE
FB4	372	361	0.975316	0.0433038	-0.0360589	0.739614	1	1	FALSE
SAT6	4	5	0.757181	-0.321928	-0.401291	0.747903	1	1	FALSE
OJ.1.54.PILER-DF.CENTROID	6	4	1.41971	0.584963	0.5056	0.754835	1	1	FALSE
AGAM.133.158.PILER-DF.CENTROID	8	6	1.26197	0.415037	0.335675	0.791634	1	1	FALSE
OJ.0.61.PILER-DF.CENTROID	31	27	1.08669	0.199309	0.119946	0.793716	1	1	FALSE
DPSE.17.27.PILER-DF.CENTROID	7	8	0.828166	-0.192645	-0.272008	0.799285	1	1	FALSE
TC1	143	131	1.03318	0.126448	0.0470856	0.809143	1	1	FALSE
DPSE.58.115.PILER-DF.CENTROID	14	12	1.10422	0.222392	0.14303	0.846536	1	1	FALSE
OJ.0.96.PILER-DF.CENTROID	30	30	0.946476	0	-0.0793627	0.89747	1	1	FALSE
297	147	137	1.01556	0.10164	0.0222775	0.905638	1	1	FALSE
DANA.48.51.PILER-DF.CENTROID	261	245	1.00829	0.0912681	0.0119053	0.929199	1	1	FALSE
dana.group.5	305	291	0.992011	0.0677901	-0.0115726	0.934711	1	1	FALSE
OJ.0.14.PILER-DF.CENTROID	242	230	0.995857	0.0733732	-0.00598954	0.963318	1	1	FALSE
DANA.138.251.PILER-DF.CENTROID	15	14	1.01408	0.0995357	0.0201729	1	1	1	FALSE
>dyak.group.1	2	2	0.946476	0	-0.0793627	1	1	1	FALSE
AGAM.179.263.PILER-DF.CENTROID	3	2	1.41971	0.584963	0.5056	1	1	1	FALSE
AGAM.213.322.PILER-DF.CENTROID	2	2	0.946476	0	-0.0793627	1	1	1	FALSE
AGM1	2	2	0.946476	0	-0.0793627	1	1	1	FALSE
ALA	3	2	1.41971	0.584963	0.5056	1	1	1	FALSE
BEL18	3	2	1.41971	0.584963	0.5056	1	1	1	FALSE
DANA.11.177.PILER-DF.CENTROID	2	2	0.946476	0	-0.0793627	1	1	1	FALSE
DANA.133.237.PILER-DF.CENTROID	3	2	1.41971	0.584963	0.5056	1	1	1	FALSE
dana.group.22	3	2	1.41971	0.584963	0.5056	1	1	1	FALSE
dper.group.2	2	2	0.946476	0	-0.0793627	1	1	1	FALSE
dpse.group.5	3	2	1.41971	0.584963	0.5056	1	1	1	FALSE
dsim.group.1	2	2	0.946476	0	-0.0793627	1	1	1	FALSE
dvir.group.9	2	2	0.946476	0	-0.0793627	1	1	1	FALSE
DYAK.12.25.PILER-DF.CENTROID	2	2	0.946476	0	-0.0793627	1	1	1	FALSE
DYAK.6.10.PILER-DF.CENTROID	2	2	0.946476	0	-0.0793627	1	1	1	FALSE
dyak.group.2	3	3	0.946476	0	-0.0793627	1	1	1	FALSE
G7	3	2	1.41971	0.584963	0.5056	1	1	1	FALSE
GYPSY2-I_AG	2	2	0.946476	0	-0.0793627	1	1	1	FALSE
GYPSY6-I_AG	2	2	0.946476	0	-0.0793627	1	1	1	FALSE
INVADER5	2	2	0.946476	0	-0.0793627	1	1	1	FALSE
OJ.0.36.PILER-DF.CENTROID	2	2	0.946476	0	-0.0793627	1	1	1	FALSE
OJ.1.12.PILER-DF.CENTROID	2	2	0.946476	0	-0.0793627	1	1	1	FALSE
OJ.13.4.PILER-DF.CENTROID	2	2	0.946476	0	-0.0793627	1	1	1	FALSE
OJ.22.29.PILER-DF.CENTROID	2	2	0.946476	0	-0.0793627	1	1	1	FALSE
P4_AG	2	2	0.946476	0	-0.0793627	1	1	1	FALSE
PARIS	2	2	0.946476	0	-0.0793627	1	1	1	FALSE
TRANSIB1	4	3	1.26197	0.415037	0.335675	1	1	1	FALSE
AGAM.164.224.PILER-DF.CENTROID	3	2	1.41971	0.584963	0.5056	1	1	1	FALSE
ALUII	3	2	1.41971	0.584963	0.5056	1	1	1	FALSE
dana.group.21	2	2	0.946476	0	-0.0793627	1	1	1	FALSE
dmow.group.4	2	2	0.946476	0	-0.0793627	1	1	1	FALSE
DPSE.45.97.PILER-DF.CENTROID	3	2	1.41971	0.584963	0.5056	1	1	1	FALSE
DSIM.5.5.PILER-DF.CENTROID	2	2	0.946476	0	-0.0793627	1	1	1	FALSE
GYPSY_DS	2	2	0.946476	0	-0.0793627	1	1	1	FALSE
HAT1	3	2	1.41971	0.584963	0.5056	1	1	1	FALSE
HELITRON2_AG	3	2	1.41971	0.584963	0.5056	1	1	1	FALSE
OJ.31.44.PILER-DF.CENTROID	2	2	0.946476	0	-0.0793627	1	1	1	FALSE
ARS406	2	2	0.946476	0	-0.0793627	1	1	1	FALSE
GYPSY7-I_AG	2	2	0.946476	0	-0.0793627	1	1	1	FALSE
HARBINGER1_AG	2	2	0.946476	0	-0.0793627	1	1	1	FALSE
AGAM.94.83.PILER-DF.CENTROID	2	2	0.946476	0	-0.0793627	1	1	1	FALSE
DGRI.6.273.PILER-DF.CENTROID	2	2	0.946476	0	-0.0793627	1	1	1	FALSE
DANA.92.139.PILER-DF.CENTROID	2	2	0.946476	0	-0.0793627	1	1	1	FALSE
DPSE.23.42.PILER-DF.CENTROID	2	2	0.946476	0	-0.0793627	1	1	1	FALSE
PENELOPE	2	2	0.946476	0	-0.0793627	1	1	1	FALSE
DPSE.62.119.PILER-DF.CENTROID	2	2	0.946476	0	-0.0793627	1	1	1	FALSE
GYPSY5-I_AG	2	2	0.946476	0	-0.0793627	1	1	1	FALSE
OJ.36.55.PILER-DF.CENTROID	2	2	0.946476	0	-0.0793627	1	1	1	FALSE
dana.group.15	2	2	0.946476	0	-0.0793627	1	1	1	FALSE
DPSE.52.108.PILER-DF.CENTROID	2	2	0.946476	0	-0.0793627	1	1	1	FALSE
OJ.37.57.PILER-DF.CENTROID	2	2	0.946476	0	-0.0793627	1	1	1	FALSE
AGAM.180.267.PILER-DF.CENTROID	2	2	0.946476	0	-0.0793627	1	1	1	FALSE
dwil.group.11	2	2	0.946476	0	-0.0793627	1	1	1	FALSE
DYAK.15.37.PILER-DF.CENTROID	2	2	0.946476	0	-0.0793627	1	1	1	FALSE
GYPSY13	2	2	0.946476	0	-0.0793627	1	1	1	FALSE
TC1-2	2	2	0.946476	0	-0.0793627	1	1	1	FALSE

## Sheet: consensus
Transposable Element	value1 (Hmr–)	value2 (Hmr+/–)	Normalized Fold Change	log2(Fold_change)	log2(Fold_change) normalized	p-value	q-value(Benjamini et al. 1995)	q-value(Storey et al. 2003)	Signature(p-value < 0.001)
BATUMI	1997	144	13.4249	3.79369	3.74684	0	0	0	TRUE
COPIA	28662	7624	3.63931	1.91052	1.86367	0	0	0	TRUE
HETA	76323	2126	34.7526	5.1659	5.11905	0	0	0	TRUE
HMR2	1339	25	51.8485	5.74308	5.69623	0	0	0	TRUE
NonTE	54693467	53193218	0.995347	0.0401262	-0.00672806	0	0	0	TRUE
TAHRE	99786	2883	33.5058	5.11319	5.06634	0	0	0	TRUE
TART	32183	7177	4.34089	2.16485	2.11799	0	0	0	TRUE
TART_B1	20217	5591	3.50044	1.85439	1.80754	0	0	0	TRUE
Unassigned	7650	1919	3.85906	1.99511	1.94825	0	0	0	TRUE
GYPSY12	1798	223	7.80513	3.01128	2.96442	8.98859e-295	1.31233e-293	1.31233e-293	TRUE
GYPSY8	865	20	41.8679	5.43463	5.38777	1.03338e-220	1.37157e-219	1.37157e-219	TRUE
BLOOD	1380	227	5.88503	2.6039	2.55705	2.17312e-193	2.64397e-192	2.64397e-192	TRUE
ACCORD	637	55	11.2117	3.53379	3.48694	9.76121e-123	1.09626e-121	1.09626e-121	TRUE
BEL	3333	1667	1.93551	0.999567	0.952713	1.67293e-113	1.74463e-112	1.74463e-112	TRUE
R1	661	99	6.46341	2.73915	2.6923	4.35138e-99	4.23535e-98	4.23535e-98	TRUE
FW	1269	404	3.04072	1.65126	1.60441	5.14364e-98	4.69357e-97	4.69357e-97	TRUE
TRANSPAC	712	124	5.55845	2.52154	2.47468	6.39789e-97	5.49466e-96	5.49466e-96	TRUE
MAX	2296	1076	2.06564	1.09344	1.04659	1.08519e-91	8.80213e-91	8.80213e-91	TRUE
Bica	473	94	4.87112	2.33111	2.28425	2.70154e-59	2.07592e-58	2.07592e-58	TRUE
STALKER2	1643	908	1.75165	0.855568	0.808714	1.70922e-43	1.24773e-42	1.24773e-42	TRUE
NINJA	267	43	6.01088	2.63443	2.58758	4.21682e-39	2.9317e-38	2.9317e-38	TRUE
DIVER	2666	1811	1.42507	0.55789	0.511036	8.66128e-32	5.74794e-31	5.74794e-31	TRUE
HMSBEAGLE	2746	1894	1.40351	0.535895	0.489041	2.80453e-30	1.78026e-29	1.78026e-29	TRUE
GYPSY4	191	34	5.43813	2.48997	2.44311	1.29767e-26	7.89417e-26	7.89417e-26	TRUE
FROGGER	253	64	3.8268	1.98299	1.93614	1.55832e-26	9.10056e-26	9.10056e-26	TRUE
HOBO	478	199	2.32525	1.26424	1.21739	1.60128e-25	8.99182e-25	8.99182e-25	TRUE
INVADER3	397	152	2.52838	1.38507	1.33821	1.34957e-24	7.29767e-24	7.29767e-24	TRUE
BLASTOPIA	2115	1456	1.40619	0.538647	0.491793	6.62101e-24	3.45239e-23	3.45239e-23	TRUE
CIRCE	101	6	16.2954	4.07325	4.02639	9.21292e-23	4.63823e-22	4.63823e-22	TRUE
dyak.group.3	620	322	1.86394	0.945208	0.898353	1.55452e-20	7.56534e-20	7.56534e-20	TRUE
BS2	192	50	3.71729	1.94111	1.89425	6.35141e-20	2.99131e-19	2.99131e-19	TRUE
PEN1	4059	4757	0.826003	-0.228928	-0.275782	3.41229e-19	1.55686e-18	1.55686e-18	TRUE
G6	146	36	3.92596	2.0199	1.97305	2.78555e-16	1.23239e-15	1.23239e-15	TRUE
TIRANT	2074	1540	1.30372	0.429486	0.382631	2.50011e-15	1.07358e-14	1.07358e-14	TRUE
IDEFIX	125	31	3.90341	2.01159	1.96473	5.54158e-14	2.31163e-13	2.31163e-13	TRUE
QUASIMODO	385	199	1.87285	0.95209	0.905236	2.14215e-13	8.68762e-13	8.68762e-13	TRUE
1731	670	413	1.57044	0.698019	0.651165	3.04095e-13	1.19994e-12	1.19994e-12	TRUE
DOC2	181	68	2.57671	1.41238	1.36553	2.29284e-12	8.80933e-12	8.80933e-12	TRUE
BURDOCK	289	139	2.0127	1.05598	1.00913	3.06753e-12	1.14836e-11	1.14836e-11	TRUE
CR1A	156	57	2.64939	1.45251	1.40566	3.5175e-11	1.28389e-10	1.28389e-10	TRUE
GTWIN	90	24	3.63017	1.90689	1.86004	7.48201e-10	2.66433e-09	2.66433e-09	TRUE
INVADER2	255	130	1.89886	0.971986	0.925131	1.34405e-09	4.67219e-09	4.67219e-09	TRUE
Chimpo	171	74	2.23697	1.2084	1.16154	1.88556e-09	6.40214e-09	6.40214e-09	TRUE
MICROPIA	66	13	4.91469	2.34395	2.2971	2.38495e-09	7.9137e-09	7.9137e-09	TRUE
G5	77	19	3.92313	2.01886	1.972	3.82206e-09	1.24005e-08	1.24005e-08	TRUE
NOMAD	431	268	1.55682	0.685455	0.638601	9.81566e-09	3.11541e-08	3.11541e-08	TRUE
BARI1	204	100	1.97481	1.02857	0.981715	1.04321e-08	3.2406e-08	3.2406e-08	TRUE
STALKER4	304	178	1.65329	0.772194	0.72534	6.69019e-08	2.03493e-07	2.03493e-07	TRUE
DEC1_DS	8243	8667	0.920687	-0.0723632	-0.119217	7.89752e-08	2.35314e-07	2.35314e-07	TRUE
ROVER	677	478	1.37106	0.502145	0.455291	1.11636e-07	3.25976e-07	3.25976e-07	TRUE
IVK	66	18	3.5495	1.87447	1.82761	2.55275e-07	7.30787e-07	7.30787e-07	TRUE
Jockey	213	115	1.79299	0.88922	0.842365	3.16766e-07	8.89381e-07	8.89381e-07	TRUE
ROO	1102	849	1.25652	0.376288	0.329434	5.47571e-07	1.5084e-06	1.5084e-06	TRUE
BAGGINS1	31	4	7.50235	2.9542	2.90734	3.79337e-06	1.02561e-05	1.02561e-05	TRUE
RT1A	144	73	1.90957	0.9801	0.933246	4.59401e-06	1.2195e-05	1.2195e-05	TRUE
G2	46	12	3.71084	1.9386	1.89175	9.48305e-06	2.47237e-05	2.47237e-05	TRUE
POGO	299	195	1.48434	0.616671	0.569817	1.49794e-05	3.83683e-05	3.83683e-05	TRUE
GYPSY11	23	2	11.1325	3.52356	3.47671	2.05232e-05	5.16619e-05	5.16619e-05	TRUE
DOC6	111	56	1.9188	0.987061	0.940207	5.10169e-05	0.000126245	0.000126245	TRUE
RT1B	102	51	1.93609	1	0.953146	9.24462e-05	0.000224952	0.000224952	TRUE
dyak.group.1	24	4	5.80827	2.58496	2.53811	0.000189218	0.000452881	0.000452881	TRUE
S	85	43	1.91358	0.983126	0.936272	0.000514894	0.00121249	0.00121249	TRUE
INVADER6	67	31	2.09223	1.11189	1.06504	0.00053515	0.00124019	0.00124019	TRUE
FW2	20	4	4.84022	2.32193	2.27507	0.00159415	0.00363664	0.00363664	FALSE
INVADER4	52	23	2.18862	1.17688	1.13002	0.00163772	0.00367857	0.00367857	FALSE
DOC3	109	65	1.62334	0.745817	0.698962	0.00183261	0.00405396	0.00405396	FALSE
QUASIMODO2	72	38	1.83419	0.921997	0.875143	0.0021898	0.00477181	0.00477181	FALSE
PEN4	270	336	0.777893	-0.315502	-0.362356	0.00228482	0.00490563	0.00490563	FALSE
412	4003	4138	0.936463	-0.047852	-0.0947063	0.00307845	0.00651383	0.00651383	FALSE
M4	21	6	3.38816	1.80735	1.7605	0.006096	0.0127145	0.0127145	FALSE
HELENA	13	2	6.29229	2.70044	2.65359	0.00749522	0.0154127	0.0154127	FALSE
ZAM	93	129	0.697893	-0.472068	-0.518923	0.00872525	0.0176929	0.0176929	FALSE
Gypsy2	108	71	1.47252	0.60514	0.558286	0.0110062	0.0220123	0.0220123	FALSE
dsec.12.12.centroid	6848	6345	1.04479	0.110063	0.0632083	0.0121435	0.0239588	0.0239588	FALSE
GYPSY6	39	19	1.98704	1.03747	0.99062	0.0125729	0.0244752	0.0244752	FALSE
TABOR	107	71	1.45888	0.59172	0.544866	0.013345	0.0256364	0.0256364	FALSE
GYPSY6A	15	4	3.63017	1.90689	1.86004	0.0195035	0.0369806	0.0369806	FALSE
G3	11	2	5.32425	2.45943	2.41258	0.022682	0.042456	0.042456	FALSE
GYPSY	48	71	0.654453	-0.564785	-0.611639	0.0273623	0.0505683	0.0505683	FALSE
GYPSY7	11	3	3.5495	1.87447	1.82761	0.0578242	0.105529	0.105529	FALSE
Chouto	31	17	1.76526	0.866733	0.819879	0.0610665	0.11007	0.11007	FALSE
HETRP	9	2	4.3562	2.16993	2.12307	0.0658121	0.117178	0.117178	FALSE
dgri.169.80.centroid	49	31	1.53014	0.660514	0.613659	0.073097	0.12858	0.12858	FALSE
PROTOP_A	52	34	1.48054	0.612977	0.566123	0.0841159	0.146202	0.146202	FALSE
DOC4	8	2	3.87218	2	1.95315	0.109838	0.188664	0.188664	FALSE
PROTOP	76	55	1.33766	0.466568	0.419714	0.115429	0.195961	0.195961	FALSE
ACCORD2	12	21	0.553168	-0.807355	-0.854209	0.116985	0.19632	0.19632	FALSE
COPIA2	40	26	1.4893	0.621488	0.574634	0.139026	0.230656	0.230656	FALSE
FB4	115	90	1.23695	0.353637	0.306783	0.142325	0.233477	0.233477	FALSE
GYPSY5	43	29	1.43538	0.568284	0.52143	0.156855	0.254454	0.254454	FALSE
TRANSIB3	13	6	2.09743	1.11548	1.06862	0.168132	0.269751	0.269751	FALSE
Transib5	2	6	0.322682	-1.58496	-1.63182	0.172989	0.274527	0.274527	FALSE
PROTOP_B	7	2	3.38816	1.80735	1.7605	0.180206	0.282905	0.282905	FALSE
176	222	189	1.13707	0.232173	0.185319	0.199807	0.310339	0.310293	FALSE
GYPSY2	24	15	1.54887	0.678072	0.631218	0.201903	0.310293	0.310293	FALSE
GYPSY_3	588	527	1.0801	0.158013	0.111159	0.208384	0.316918	0.316918	FALSE
G4	11	5	2.1297	1.1375	1.09065	0.21108	0.317707	0.317707	FALSE
297	431	382	1.09222	0.174115	0.127261	0.219559	0.327098	0.326571	FALSE
ROOA	261	226	1.11796	0.207727	0.160873	0.221442	0.326571	0.326571	FALSE
TC1	27	18	1.45207	0.584963	0.538108	0.235466	0.343781	0.343781	FALSE
LOOPER1	6	2	2.90413	1.58496	1.53811	0.289581	0.418603	0.418603	FALSE
TRANSIB2	10	5	1.93609	1	0.953146	0.302724	0.43331	0.43331	FALSE
G	6	10	0.580827	-0.736966	-0.78382	0.325346	0.46117	0.46117	FALSE
DIVER2	24	17	1.36665	0.4975	0.450645	0.351501	0.493453	0.493453	FALSE
PLACW	27	20	1.30686	0.432959	0.386105	0.384649	0.534846	0.534846	FALSE
Gypsy1	20	14	1.38292	0.514573	0.467719	0.393661	0.542212	0.542212	FALSE
dsim.group.2	21	15	1.35526	0.485427	0.438573	0.407271	0.555716	0.555716	FALSE
INVADER1	47	38	1.19732	0.306661	0.259807	0.448246	0.605962	0.605962	FALSE
BS	20	25	0.774436	-0.321928	-0.368782	0.456718	0.611751	0.611751	FALSE
PEN2	170	178	0.924537	-0.0663425	-0.113197	0.485949	0.644986	0.644986	FALSE
FW3	8	11	0.704033	-0.459432	-0.506286	0.497462	0.651385	0.647462	FALSE
Transib1	8	11	0.704033	-0.459432	-0.506286	0.497462	0.651385	0.647462	FALSE
Transib4	3	5	0.580827	-0.736966	-0.78382	0.501118	0.647462	0.647462	FALSE
GYPSY10	36	29	1.20171	0.311944	0.26509	0.535438	0.685736	0.685736	FALSE
MARINER2	7	4	1.69408	0.807355	0.760501	0.549423	0.697528	0.697528	FALSE
DOC5	15	11	1.32006	0.447459	0.400605	0.558561	0.703016	0.703016	FALSE
TC1-2	16	12	1.29073	0.415037	0.368183	0.57302	0.715051	0.715051	FALSE
I	292	294	0.961459	-0.00984779	-0.056702	0.649591	0.803732	0.803732	FALSE
NTS	12	9	1.29073	0.415037	0.368183	0.66451	0.815281	0.815281	FALSE
INVADER5	4	2	1.93609	1	0.953146	0.687747	0.836759	0.836759	FALSE
JOCKEY2	3	4	0.726034	-0.415037	-0.461892	0.722342	0.871587	0.871587	FALSE
dpse.41.89.centroid	23	20	1.11325	0.201634	0.15478	0.762112	0.912036	0.912036	FALSE
R2	10	11	0.880041	-0.137504	-0.184358	0.829531	0.984647	0.984647	FALSE
G5A	32	32	0.968045	0	-0.0468543	0.90132	1	1	FALSE
GYPSY9	42	42	0.968045	0	-0.0468543	0.913387	1	1	FALSE
MDG1	136	130	1.01272	0.065095	0.0182408	0.951128	1	1	FALSE
agam.group.17	4	3	1.29073	0.415037	0.368183	1	1	1	FALSE
BS3	2	2	0.968045	0	-0.0468543	1	1	1	FALSE
DOC	10	10	0.968045	0	-0.0468543	1	1	1	FALSE
dyak.15.37.centroid	47	45	1.01107	0.0627358	0.0158815	1	1	1	FALSE
G7	3	2	1.45207	0.584963	0.538108	1	1	1	FALSE
R1-2	2	2	0.968045	0	-0.0468543	1	1	1	FALSE
RPR	2	2	0.968045	0	-0.0468543	1	1	1	FALSE
S2	2	2	0.968045	0	-0.0468543	1	1	1	FALSE
SAR	2	2	0.968045	0	-0.0468543	1	1	1	FALSE
agam.16.244.centroid	2	2	0.968045	0	-0.0468543	1	1	1	FALSE
ALUII	3	2	1.45207	0.584963	0.538108	1	1	1	FALSE
dmel.32.44.centroid	2	2	0.968045	0	-0.0468543	1	1	1	FALSE
RSP	2	2	0.968045	0	-0.0468543	1	1	1	FALSE
RT1C	2	2	0.968045	0	-0.0468543	1	1	1	FALSE
TOM1	2	2	0.968045	0	-0.0468543	1	1	1	FALSE
agam.110.111.centroid	2	2	0.968045	0	-0.0468543	1	1	1	FALSE
MINIME_DN	2	2	0.968045	0	-0.0468543	1	1	1	FALSE
STALKER3	2	2	0.968045	0	-0.0468543	1	1	1	FALSE
dmel.33.45.centroid	2	2	0.968045	0	-0.0468543	1	1	1	FALSE
dyak.16.38.centroid	2	2	0.968045	0	-0.0468543	1	1	1	FALSE
