# Supplementary material for: The Hmr and Lhr Hybrid Incompatibility Genes Suppress a Broad Range of Heterochromatic Repeats
Source: PLoS Genet. 2014 Mar 20;10(3):e1004240. doi: 10.1371/journal.pgen.1004240 (PMC3961192; doi:10.1371/journal.pgen.1004240)
Supplement: Table S7 — DEG-seq output measuring the statistical significance of the differences in satellite DNA expression between LhrKO and Lhr+ ovaries, based on reads uniquely mapped with no mismatches. (XLSX) [file pgen.1004240.s012.xlsx]

## Sheet: output score DEGseq
Repetitive DNA class	Reads Lhr+	Reads LhrKO	log2(Fold_change)	log2(Fold_change) normalized	Normalized Fold Change	p-value	q-value(Benjamini et al. 1995)	q-value(Storey et al. 2003)	Signature(p-value < 0.001)	Sequence name or type
(GAGAA)n_(TTCTC)n	68	1643	-4.59465	-4.89099	29.6712	0	0	0	TRUE	GA rich satellite
emb|X93490|DMYRETTR6|D.melanogaster	1	22	-4.45943	-4.75577	27.0165	2.91e-07	1.1931e-06	1.1931e-06	TRUE	HeT-A-like DNA
(GGAGAA)n_(TTCTCC)n	5	36	-2.848	-3.14433	8.84176	1.35931e-08	7.96167e-08	7.96167e-08	TRUE	satellite DNA
(ATAAG)n_(CTTAT)n	2	12	-2.58496	-2.8813	7.36813	0.00233118	0.00597366	0.00597366	FALSE
emb|Z37541|DMCBHETLA|D.melanogaster	4	23	-2.52356	-2.8199	7.06113	2.09095e-05	7.79353e-05	7.79353e-05	TRUE	DNA for centromeric beta-heterochromatin sequencethat binds to lamins, shows some similarity to Accord
(CAAGA)n_(TCTTG)n	11	44	-2	-2.29634	4.91209	1.62238e-07	8.31472e-07	8.31472e-07	TRUE	AAGAC satellite
(GAAAA)n_(CTTTT)n	3	9	-1.58496	-1.8813	3.68407	0.0433976	0.0889651	0.0889651	FALSE
emb|X01449|DMH55SUF|Drosophila	1	3	-1.58496	-1.8813	3.68407	0.332206	0.534136	0.523864	FALSE	H55 gene suffix sequence
(TA)n	1	3	-1.58496	-1.8813	3.68407	0.332206	0.534136	0.523864	FALSE
emb|L36594|DMHCHRMA|Drosophila	48	138	-1.52356	-1.8199	3.53056	7.91926e-16	8.11724e-15	8.11724e-15	TRUE	chromosome Y DNA fragment, shows similarity to Gypsy12
GAGAGAA_TTCTCTC	7	20	-1.51457	-1.81091	3.50864	0.00301794	0.00727857	0.00727857	FALSE	GA rich satellite
emb|S78304|S78304|HP1-VS	35	90	-1.36257	-1.65891	3.15777	1.1811e-09	8.07086e-09	8.07086e-09	TRUE	RSS, VS, exon 1, fl-cDNA, recombination signal sequences,repetitive vivi-sequence
emb|M21213|DMRSP1|D.melanogaster	4	10	-1.32193	-1.61826	3.07006	0.0591846	0.115551	0.115551	FALSE	D.melanogaster segregation distorter (SD) responder (Rsp) element,segment 1
emb|X62679|DMSUPF|D.melanogaster	14	34	-1.28011	-1.57644	2.98234	0.000385124	0.00112786	0.00112786	TRUE	suppressor of forked [su(f)] gene
emb|S50810|S50810|{satellite	1	2	-1	-1.29634	2.45604	0.590951	0.865321	0.865321	FALSE
(CACAA)n_DMDNASMEM	151	289	-0.936521	-1.23286	2.35032	2.08673e-18	2.85186e-17	2.85186e-17	TRUE	AACAC satellite
emb|Z11734|DMSTEGHA|D.melanogaster	72	109	-0.598259	-0.894596	1.85909	3.62507e-05	0.000123857	0.000123857	TRUE	D.melanogaster Su(Ste) gene homologous DNA
emb|V00225|DMREP1|Repetitive	2	3	-0.584963	-0.881299	1.84203	0.662696	0.936915	0.936915	FALSE	1.688 or 359bp satellite
emb|X60225|DMH1H3|D.melanogaster	3	4	-0.415037	-0.711374	1.63736	0.707951	0.967532	0.967532	FALSE	Histone H1-H3 intergenic spacer
emb|U35403|DM35403|Drosophila	21	27	-0.36257	-0.658907	1.57889	0.145985	0.260234	0.260234	FALSE	Drosophila melanogaster proximal subterminal region at telomere 2L
emb|Z11735|DMSTEGHB|D.melanogaster	19	23	-0.275634	-0.571971	1.48655	0.216441	0.369754	0.369754	FALSE	D.melanogaster Su(Ste) gene homologous DNA
emb|U35404|DM35404|Drosophila	14	16	-0.192645	-0.488982	1.40345	0.364818	0.553983	0.553983	FALSE	Drosophila melanogaster subterminal minisatellite at telomere of2L
(CAGT)n_(GTCA)n	1	1	0	-0.296337	1.22802	1	1	1	FALSE
emb|J01069|DMARS406|d.	1	1	0	-0.296337	1.22802	1	1	1	FALSE	D. melanogaster autonomous replication sequence (ars) 406
emb|M54969|DMSUFFIX|Drosophila	1	1	0	-0.296337	1.22802	1	1	1	FALSE	Suffix sequence
emb|X14650|DMSAT05|Drosophila	1	1	0	-0.296337	1.22802	1	1	1	FALSE	Drosophila satellite DNA fragment 1.672-573
emb|X52809|DMHMRRPTA|D.	1	1	0	-0.296337	1.22802	1	1	1	FALSE	D. melanogaster DNA non-mobile heterochromatic moderate repeats(HMR family) with an inserted copia-like element (MDG1).
emb|X93127|DM14G722|D.melanogaster	1	1	0	-0.296337	1.22802	1	1	1	FALSE	Dodeca Like
emb|X93138|DMORM2|D.melanogaster	1	1	0	-0.296337	1.22802	1	1	1	FALSE	1.688 or 359bp satellite
emb|X93141|DM14G7VR|D.melanogaster	1	1	0	-0.296337	1.22802	1	1	1	FALSE
emb|Z71788|DMPORTO1|D.melanogaster	1	1	0	-0.296337	1.22802	1	1	1	FALSE	Porto1, pericentromeric region of Chromosome 2, Oregon R
(CAA)n	343	319	0.104652	-0.191685	1.1421	0.0928808	0.173096	0.173096	FALSE
unmappedreads	51188712	41682288	0.296391	5.43634e-05	0.999962	3.16768e-62	6.49375e-61	6.49375e-61	TRUE
emb|X04342|DMSUF1|Drosophila	1430	1069	0.419753	0.123416	0.918011	0.0347232	0.074929	0.074929	FALSE	mRNA (C-terminal) with suffix sequence (C208)
emb|X04345|DMSUF4|Drosophila	1401	1002	0.483574	0.187238	0.878286	0.00169919	0.00464445	0.00464445	FALSE	DMSUF4|Drosophila suffix sequence from gene CG208
emb|X04346|DMSUF5|Drosophila	628	364	0.786826	0.490489	0.711784	1.85904e-07	8.46895e-07	8.46895e-07	TRUE	Drosophila suffix sequence from gene CG363
emb|X04343|DMSUF2|Drosophila	651	343	0.924449	0.628112	0.647023	3.49371e-11	2.86484e-10	2.86484e-10	TRUE	Drosophila mRNA (C-terminal) with suffix sequence (C363)
emb|X15366|DMSAT07|Drosophila	2	1	1	0.703663	0.614011	1	1	1	FALSE	Satellite DNA 1.686-9
(TAA)n_(ATT)n	2	1	1	0.703663	0.614011	1	1	1	FALSE
emb|M54972|DMSUFFIXC|Drosophila	85	41	1.05184	0.755502	0.59234	0.00538685	0.0122701	0.0122701	FALSE	Drosophila melanogaster AG208 gene, suffix sequence.
emb|X04344|DMSUF3|Drosophila	82	31	1.40336	1.10702	0.464252	0.000196219	0.000618845	0.000618845	TRUE	sequence from gene AG208
