# Supplementary material for: The Hmr and Lhr Hybrid Incompatibility Genes Suppress a Broad Range of Heterochromatic Repeats
Source: PLoS Genet. 2014 Mar 20;10(3):e1004240. doi: 10.1371/journal.pgen.1004240 (PMC3961192; doi:10.1371/journal.pgen.1004240)
Supplement: Table S14 — DEG-seq output measuring the statistical significance of the differences in TE expression between D. simulans w501 and Lhr1 ovaries based on reads uniquely mapped to either the individual-insertion or consensus-sequence TE databases, while allowing for no mismatches for insertions and up to three mismatches for consensus. (XLSX) [file pgen.1004240.s019.xlsx]

## Sheet: Insertions
Transposable element	value1 (W501)	value2 (Lhr1)	log2(Fold_change)	log2(Fold_change) normalized	Normalized Fold change	p-value	q-value(Benjamini et al. 1995)	q-value(Storey et al. 2003)	Signature(p-value < 0.001)
3S18	171	2888	-4.078	-4.14485	17.6898	0	0	0	TRUE
BATUMI	4355	11095	-1.34917	-1.41601	2.66846	0	0	0	TRUE
CIRCE	11670	134	6.44443	6.37758	0.012027	0	0	0	TRUE
dmow.group.3	293	2287	-2.96448	-3.03133	8.17561	0	0	0	TRUE
DSIM.7.7.PILER-DF.CENTROID	127	1700	-3.74263	-3.80948	14.0206	0	0	0	TRUE
FLEA	1779	4790	-1.42896	-1.4958	2.82021	0	0	0	TRUE
HETA	3932	89380	-4.50662	-4.57346	23.8094	0	0	0	TRUE
NOMAD	473	2664	-2.49368	-2.56052	5.89922	0	0	0	TRUE
unmappedreads	116885506	111491056	0.0681681	0.00132523	0.999082	0	0	0	TRUE
GYPSY5	333	1827	-2.45588	-2.52273	5.74667	1.8637e-264	5.23698e-263	5.23698e-263	TRUE
TART	2772	5418	-0.966833	-1.03368	2.04723	9.14375e-219	2.33581e-217	2.33581e-217	TRUE
PROTOP	212	1303	-2.6197	-2.68654	6.43769	6.51793e-203	1.52628e-201	1.52628e-201	TRUE
COPIA2	1292	3148	-1.28483	-1.35167	2.55208	4.51239e-195	9.7537e-194	9.7537e-194	TRUE
ACCORD2	89	734	-3.0439	-3.11075	8.63829	1.20368e-133	2.41596e-132	2.41596e-132	TRUE
GYPSY8	569	1543	-1.43924	-1.50608	2.84037	2.37276e-113	4.44497e-112	4.44497e-112	TRUE
NINJA	1410	2748	-0.962687	-1.02953	2.04136	3.14762e-111	5.528e-110	5.528e-110	TRUE
RT1	347451	314156	0.145328	0.0784856	0.947051	1.39873e-108	2.31202e-107	2.31202e-107	TRUE
CR1	1598	2820	-0.819428	-0.886271	1.84839	2.94662e-89	4.60001e-88	4.60001e-88	TRUE
DOC5	111	590	-2.41016	-2.477	5.56738	7.46611e-85	1.1042e-83	1.1042e-83	TRUE
412	534	1320	-1.30563	-1.37247	2.58913	9.7451e-85	1.36919e-83	1.36919e-83	TRUE
R1	1120	2152	-0.942179	-1.00902	2.01255	1.18178e-84	1.58133e-83	1.58133e-83	TRUE
GYPSY7	224	808	-1.85086	-1.9177	3.7782	4.9136e-84	6.276e-83	6.276e-83	TRUE
DVIR.35.83.PILER-DF.CENTROID	356	1009	-1.50298	-1.56982	2.96868	2.52517e-79	3.0851e-78	3.0851e-78	TRUE
GYPSY4	370	1031	-1.47845	-1.54529	2.91863	3.07135e-79	3.59604e-78	3.59604e-78	TRUE
BURDOCK	497	1212	-1.28607	-1.35291	2.55428	2.69614e-76	3.03046e-75	3.03046e-75	TRUE
JOCKEY2	267	806	-1.59394	-1.66078	3.16188	4.84139e-69	5.23242e-68	5.23242e-68	TRUE
SPRINGER	274	817	-1.57616	-1.643	3.12315	7.85482e-69	8.17484e-68	8.17484e-68	TRUE
GTWIN	210	690	-1.71621	-1.78305	3.44153	2.08811e-65	2.09556e-64	2.09556e-64	TRUE
RT1B	298	829	-1.47606	-1.5429	2.9138	7.32786e-64	7.10044e-63	7.10044e-63	TRUE
dsim.group.2	235	707	-1.58905	-1.65589	3.15118	1.80709e-60	1.69264e-59	1.69264e-59	TRUE
TIRANT	86	431	-2.32528	-2.39212	5.24929	7.57486e-60	6.86624e-59	6.86624e-59	TRUE
BS2	228	674	-1.56371	-1.63056	3.09633	1.90632e-56	1.67399e-55	1.67399e-55	TRUE
DYAK.20.48.PILER-DF.CENTROID	1399	659	1.08605	1.0192	0.493389	7.50093e-54	6.38716e-53	6.38716e-53	TRUE
R2	786	1428	-0.861395	-0.928238	1.90295	1.2232e-49	1.01094e-48	1.01094e-48	TRUE
IVK	118	441	-1.90199	-1.96883	3.91452	2.54024e-48	2.03945e-47	2.03945e-47	TRUE
INVADER3	221	605	-1.45289	-1.51973	2.86738	4.25345e-46	3.32005e-45	3.32005e-45	TRUE
FW	326	758	-1.21733	-1.28417	2.43542	9.08638e-45	6.90074e-44	6.90074e-44	TRUE
G5	271	666	-1.29723	-1.36407	2.57411	2.75736e-43	2.03899e-42	2.03899e-42	TRUE
GYPSY	487	975	-1.00148	-1.06832	2.09699	4.99843e-43	3.60143e-42	3.60143e-42	TRUE
FW2	133	430	-1.69291	-1.75975	3.3864	1.25369e-40	8.80719e-40	8.80719e-40	TRUE
DOC3	426	868	-1.02684	-1.09368	2.13418	6.84632e-40	4.69223e-39	4.69223e-39	TRUE
TC1	850	1415	-0.735267	-0.80211	1.74365	8.65886e-39	5.79319e-38	5.79319e-38	TRUE
1731	3341	4289	-0.360361	-0.427204	1.34463	5.60828e-38	3.66495e-37	3.66495e-37	TRUE
QUASIMODO	137	419	-1.61277	-1.67962	3.20343	3.24859e-37	2.07467e-36	2.07467e-36	TRUE
I	507	949	-0.904422	-0.971265	1.96056	4.62338e-36	2.88705e-35	2.88705e-35	TRUE
GYPSY2	495	933	-0.914449	-0.981291	1.97423	5.12413e-36	3.13018e-35	3.13018e-35	TRUE
DANA.82.116.PILER-DF.CENTROID	164	451	-1.45943	-1.52627	2.88041	4.72295e-35	2.82372e-34	2.82372e-34	TRUE
G3	85	312	-1.87601	-1.94285	3.84465	4.17122e-34	2.4419e-33	2.4419e-33	TRUE
ZAM	83	297	-1.83928	-1.90612	3.748	1.22617e-31	7.03172e-31	7.03172e-31	TRUE
OJ.0.64.PILER-DF.CENTROID	1783	1106	0.688955	0.622112	0.649719	3.65325e-30	2.05313e-29	2.05313e-29	TRUE
G4	41	209	-2.34981	-2.41665	5.3393	4.03953e-30	2.2257e-29	2.2257e-29	TRUE
GYPSY6	126	362	-1.52257	-1.58941	3.00926	4.62152e-30	2.4974e-29	2.4974e-29	TRUE
ROO	76290	68843	0.148184	0.0813412	0.945179	7.17086e-27	3.80191e-26	3.80191e-26	TRUE
INVADER2	18	143	-2.98995	-3.05679	8.32119	1.00815e-26	5.24613e-26	5.24613e-26	TRUE
RT1C	934	1372	-0.554786	-0.621629	1.53861	1.24534e-24	6.36254e-24	6.36254e-24	TRUE
DOC2	213	461	-1.11391	-1.18076	2.26696	1.48985e-24	7.47584e-24	7.47584e-24	TRUE
DIVER2	1189	1650	-0.472717	-0.53956	1.45353	4.10889e-23	2.02561e-22	2.02561e-22	TRUE
DVIR.6.62.PILER-DF.CENTROID	122	313	-1.35928	-1.42612	2.68724	1.5428e-22	7.47461e-22	7.47461e-22	TRUE
BAGGINS1	338	604	-0.837525	-0.904368	1.87172	4.34875e-21	2.07119e-20	2.07119e-20	TRUE
PROTOP_B	1274	1696	-0.412771	-0.479614	1.39437	2.00454e-19	9.38794e-19	9.38794e-19	TRUE
STALKER2	59	192	-1.70232	-1.76916	3.40856	3.7344e-19	1.72027e-18	1.72027e-18	TRUE
dvir.group.5	116	282	-1.28157	-1.34841	2.54632	7.30289e-19	3.30986e-18	3.30986e-18	TRUE
agam.group.37	3998	3092	0.370738	0.303895	0.810062	1.12079e-18	4.99906e-18	4.99906e-18	TRUE
INVADER1	48	168	-1.80735	-1.8742	3.66598	3.52841e-18	1.54919e-17	1.54919e-17	TRUE
DSIM.8.8.PILER-DF.CENTROID	43	154	-1.84052	-1.90736	3.75123	3.29311e-17	1.42364e-16	1.42364e-16	TRUE
MICROPIA	371	607	-0.710277	-0.77712	1.71371	1.06447e-16	4.53205e-16	4.53205e-16	TRUE
INVADER4	161	333	-1.04846	-1.1153	2.16641	1.16252e-16	4.87562e-16	4.87562e-16	TRUE
297	1119	1473	-0.396547	-0.46339	1.37878	4.25547e-16	1.75851e-15	1.75851e-15	TRUE
OJ.0.51.PILER-DF.CENTROID	378	609	-0.688056	-0.754899	1.68751	5.5808e-16	2.27276e-15	2.27276e-15	TRUE
ALUII	66	3	4.45943	4.39259	0.0476101	7.64143e-16	3.06749e-15	3.06749e-15	TRUE
BS	40	135	-1.75489	-1.82173	3.53505	2.49126e-14	9.85979e-14	9.85979e-14	TRUE
BARI	127	31	2.03449	1.96765	0.25567	4.24786e-14	1.65784e-13	1.65784e-13	TRUE
agam.group.17	2506	1913	0.38955	0.322707	0.799568	1.41445e-13	5.44465e-13	5.44465e-13	TRUE
GYPSY9	67	173	-1.36854	-1.43538	2.70454	3.06394e-13	1.16347e-12	1.16347e-12	TRUE
TART_B1	4700	5184	-0.141405	-0.208248	1.15528	7.68218e-13	2.87826e-12	2.87826e-12	TRUE
OSVALDO	295	475	-0.687213	-0.754055	1.68653	9.41139e-13	3.47974e-12	3.47974e-12	TRUE
J1	96	213	-1.14975	-1.21659	2.32397	1.29541e-12	4.7274e-12	4.7274e-12	TRUE
GYPSY10	116	238	-1.03684	-1.10368	2.14902	4.03227e-12	1.45265e-11	1.45265e-11	TRUE
HOBO	1892	1424	0.409963	0.34312	0.788335	1.05068e-11	3.73723e-11	3.73723e-11	TRUE
OJ.37.57.PILER-DF.CENTROID	8	59	-2.88264	-2.94949	7.72474	1.78561e-11	6.27196e-11	6.27196e-11	TRUE
DANA.48.51.PILER-DF.CENTROID	694	445	0.64113	0.574287	0.671618	4.10107e-11	1.42272e-10	1.42272e-10	TRUE
dsim.group.1	28	97	-1.79256	-1.8594	3.62857	6.28878e-11	2.15506e-10	2.15506e-10	TRUE
G2	525	725	-0.465664	-0.532506	1.44644	9.93566e-11	3.36376e-10	3.36376e-10	TRUE
TOM	38	107	-1.49354	-1.56038	2.94932	1.1056e-09	3.69849e-09	3.69849e-09	TRUE
MDG1	2405	2720	-0.17757	-0.244413	1.18461	1.41796e-09	4.68762e-09	4.68762e-09	TRUE
176	2257	1780	0.342529	0.275686	0.826057	1.59961e-09	5.22665e-09	5.22665e-09	TRUE
INVADER6	1620	1248	0.376376	0.309533	0.806903	1.1843e-08	3.82516e-08	3.82516e-08	TRUE
BUT3	10	49	-2.29278	-2.35962	5.13237	6.5559e-08	2.09342e-07	2.09342e-07	TRUE
OJ.13.4.PILER-DF.CENTROID	14	57	-2.02554	-2.09238	4.2645	6.75176e-08	2.13173e-07	2.13173e-07	TRUE
dvir.group.9	101	36	1.48829	1.42144	0.373339	7.73671e-08	2.41557e-07	2.39054e-07	TRUE
ACCORD	767	542	0.500934	0.434091	0.74016	7.74161e-08	2.39054e-07	2.39054e-07	TRUE
DOC4	84	161	-0.938599	-1.00544	2.00756	1.24794e-07	3.81164e-07	3.81164e-07	TRUE
DANA.78.111.PILER-DF.CENTROID	5	36	-2.848	-2.91484	7.54144	2.97404e-07	8.98608e-07	8.98608e-07	TRUE
GYPSY6A	28	77	-1.45943	-1.52627	2.88041	4.0491e-07	1.21042e-06	1.21042e-06	TRUE
TRANSPAC	605	425	0.509472	0.442629	0.735792	1.11642e-06	3.30225e-06	3.30225e-06	TRUE
G5A	718	876	-0.286947	-0.35379	1.27791	1.13802e-06	3.33109e-06	3.33109e-06	TRUE
HETRP	13	49	-1.91427	-1.98111	3.94798	1.36292e-06	3.94825e-06	3.94825e-06	TRUE
INVADER5	6	35	-2.54432	-2.61116	6.10996	2.02156e-06	5.79652e-06	5.79652e-06	TRUE
TRANSIB1	63	123	-0.965235	-1.03208	2.04497	2.23672e-06	6.34866e-06	6.34866e-06	TRUE
M4	57	115	-1.0126	-1.07944	2.11322	2.59041e-06	7.27904e-06	7.27904e-06	TRUE
HELITRON2_AG	290	178	0.704176	0.637333	0.6429	2.7976e-06	7.78342e-06	7.78342e-06	TRUE
DPSE.58.115.PILER-DF.CENTROID	31	4	2.9542	2.88735	0.135151	4.14146e-06	1.14093e-05	1.14093e-05	TRUE
DVIR.32.76.PILER-DF.CENTROID	13	46	-1.82312	-1.88997	3.70626	5.78184e-06	1.57737e-05	1.57737e-05	TRUE
BS3	295	398	-0.432053	-0.498896	1.41313	6.98808e-06	1.88813e-05	1.88813e-05	TRUE
dvir.group.10	10	40	-2	-2.06684	4.18969	7.07223e-06	1.89266e-05	1.89266e-05	TRUE
LOOPER1	25	66	-1.40054	-1.46738	2.76519	7.30461e-06	1.93641e-05	1.93641e-05	TRUE
NTS	434	552	-0.346973	-0.413816	1.3322	7.94381e-06	2.08618e-05	2.08618e-05	TRUE
GYPSY12	1034	1192	-0.205148	-0.271991	1.20747	9.25939e-06	2.40916e-05	2.40916e-05	TRUE
TABOR	25	64	-1.35614	-1.42299	2.6814	1.60307e-05	4.13269e-05	4.13269e-05	TRUE
HAT1	758	571	0.408707	0.341864	0.789021	1.83301e-05	4.68252e-05	4.68252e-05	TRUE
OJ.9.60.PILER-DF.CENTROID	264	169	0.643515	0.576672	0.670509	4.23288e-05	0.000107157	0.000107157	TRUE
TLD2	10	36	-1.848	-1.91484	3.77072	8.05054e-05	0.000201982	0.000201982	TRUE
P_DG	389	274	0.505594	0.438751	0.737773	0.000116967	0.000290865	0.000290865	TRUE
DANA.88.129.PILER-DF.CENTROID	9	33	-1.87447	-1.94131	3.84055	0.000138779	0.000342078	0.000342078	TRUE
TOM1	88	140	-0.669851	-0.736694	1.66635	0.000151183	0.000369412	0.000369412	TRUE
DVIR.3.94.PILER-DF.CENTROID	213	286	-0.425162	-0.492005	1.4064	0.000164134	0.0003976	0.0003976	TRUE
TC1-2	60	105	-0.807355	-0.874198	1.83299	0.000168394	0.000404433	0.000404433	TRUE
DANA.77.110.PILER-DF.CENTROID	14	39	-1.47805	-1.54489	2.91782	0.000297192	0.000707721	0.000707721	TRUE
DANA.135.241.PILER-DF.CENTROID	182	116	0.649814	0.582971	0.667588	0.000614779	0.00145171	0.00145171	TRUE
OJ.10.24.PILER-DF.CENTROID	28	58	-1.05063	-1.11747	2.16966	0.000729486	0.00170821	0.00170821	TRUE
GYPSY3	98	144	-0.555215	-0.622058	1.53907	0.00100527	0.00233454	0.00233454	FALSE
GYPSY6-I_AG	3	17	-2.5025	-2.56934	5.93539	0.00121074	0.00278868	0.00278868	FALSE
5S	86	46	0.902703	0.83586	0.560249	0.00124474	0.00284367	0.00284367	FALSE
dpse.group.7	48	20	1.26303	1.19619	0.436426	0.00145433	0.00329569	0.00329569	FALSE
BLOOD	2481	2157	0.201896	0.135053	0.910637	0.00150859	0.0033913	0.00337789	FALSE
DYAK.10.18.PILER-DF.CENTROID	384	286	0.425091	0.358248	0.780111	0.00151464	0.00337789	0.00337789	FALSE
G	424	499	-0.234976	-0.301818	1.2327	0.00156408	0.00346068	0.00346068	FALSE
PROTOP_A	260	323	-0.313023	-0.379865	1.30122	0.00162345	0.00356398	0.00356398	FALSE
dmow.group.1	20	4	2.32193	2.25509	0.209484	0.00164653	0.00358663	0.00358663	FALSE
IDEFIX	3527	3120	0.176896	0.110053	0.926554	0.00190789	0.00412399	0.00412399	FALSE
dyak.group.2	39	15	1.37851	1.31167	0.402855	0.0024246	0.00520086	0.00520086	FALSE
dana.group.4	4	17	-2.08746	-2.15431	4.45154	0.00367579	0.00782498	0.00782498	FALSE
MAX	12935	11909	0.119228	0.0523849	0.964341	0.0042908	0.00906553	0.00906553	FALSE
FW3	30	55	-0.874469	-0.941312	1.92027	0.0045017	0.00944014	0.00944014	FALSE
HMSBEAGLE	6777	6789	-0.00255231	-0.0693951	1.04928	0.00511328	0.0106432	0.0106432	FALSE
MARINER2	797	870	-0.126436	-0.193279	1.14336	0.0065257	0.0134833	0.0134833	FALSE
COPIA	429	487	-0.182944	-0.249787	1.18903	0.00901777	0.0184963	0.0184963	FALSE
S2	3	13	-2.11548	-2.18232	4.53883	0.0110816	0.0224833	0.0224025	FALSE
TRANSIB5	3	13	-2.11548	-2.18232	4.53883	0.0110816	0.0224833	0.0224025	FALSE
TRANSIB3	73	44	0.730393	0.66355	0.631323	0.0160524	0.0322195	0.0322195	FALSE
TRANSIB2	382	432	-0.177459	-0.244302	1.18452	0.0170722	0.0340234	0.0340234	FALSE
OJ.24.31.PILER-DF.CENTROID	7	19	-1.44057	-1.50742	2.843	0.0172073	0.0340512	0.0340512	FALSE
TRAM	3	12	-2	-2.06684	4.18969	0.0188364	0.0370141	0.0370141	FALSE
G6	34	54	-0.667425	-0.734267	1.66355	0.0191284	0.0373269	0.0373269	FALSE
DYAK.3.1.PILER-DF.CENTROID	59	83	-0.492396	-0.559239	1.47349	0.0233479	0.0452467	0.0452467	FALSE
dmow.group.6	200	237	-0.244887	-0.31173	1.2412	0.0245377	0.0472267	0.0472267	FALSE
GYPSY2-I_AG	4	13	-1.70044	-1.76728	3.40412	0.0277901	0.0531225	0.0531225	FALSE
HELENA	50	72	-0.526069	-0.592912	1.50829	0.0293522	0.0557294	0.0557294	FALSE
ULYSSES	153	183	-0.258312	-0.325155	1.2528	0.0433365	0.0817286	0.0817286	FALSE
BEL5-I_AG	4	12	-1.58496	-1.65181	3.14227	0.0447822	0.0836133	0.0833364	FALSE
DVIR.9.78.PILER-DF.CENTROID	4	12	-1.58496	-1.65181	3.14227	0.0447822	0.0836133	0.0833364	FALSE
DANA.69.95.PILER-DF.CENTROID	3	10	-1.73697	-1.80381	3.49141	0.0524936	0.0967259	0.0964098	FALSE
dana.group.22	3	10	-1.73697	-1.80381	3.49141	0.0524936	0.0967259	0.0964098	FALSE
META1	97	120	-0.306978	-0.373821	1.29578	0.0575662	0.10504	0.10504	FALSE
DVIR.23.26.PILER-DF.CENTROID	5	13	-1.37851	-1.44535	2.7233	0.0586983	0.106414	0.106414	FALSE
DANA.26.173.PILER-DF.CENTROID	6	14	-1.22239	-1.28924	2.44398	0.0730084	0.131089	0.130671	FALSE
R1-2	6	14	-1.22239	-1.28924	2.44398	0.0730084	0.131089	0.130671	FALSE
HELITRON	145	111	0.385493	0.31865	0.80182	0.0803438	0.14289	0.142286	FALSE
dana.group.5	317	261	0.280433	0.21359	0.862388	0.0805104	0.142286	0.142286	FALSE
DOC	806	838	-0.0561704	-0.123013	1.08901	0.0842361	0.14794	0.147862	FALSE
412B	3	9	-1.58496	-1.65181	3.14227	0.0857705	0.148775	0.147862	FALSE
AGAM.98.89.PILER-DF.CENTROID	3	9	-1.58496	-1.65181	3.14227	0.0857705	0.148775	0.147862	FALSE
RSP	3	9	-1.58496	-1.65181	3.14227	0.0857705	0.148775	0.147862	FALSE
GYPSY5-I_AG	5	12	-1.26303	-1.32988	2.51381	0.0900164	0.154235	0.154235	FALSE
dana.group.12	23	12	0.938599	0.871757	0.546481	0.0925276	0.157577	0.157577	FALSE
TRANSIB4	132	153	-0.212994	-0.279837	1.21406	0.109585	0.185502	0.185502	FALSE
AGAM.213.322.PILER-DF.CENTROID	4	10	-1.32193	-1.38877	2.61856	0.11126	0.18721	0.18721	FALSE
DPSE.17.27.PILER-DF.CENTROID	31	18	0.784271	0.717428	0.608181	0.115145	0.192593	0.192593	FALSE
AGAM.133.158.PILER-DF.CENTROID	12	21	-0.807355	-0.874198	1.83299	0.11604	0.192942	0.192942	FALSE
DYAK.13.30.PILER-DF.CENTROID	7	14	-1	-1.06684	2.09484	0.126902	0.209761	0.209761	FALSE
SAR	495	427	0.213192	0.14635	0.903534	0.129669	0.213081	0.213081	FALSE
BARI1	74	54	0.454566	0.387723	0.764335	0.13395	0.218836	0.218836	FALSE
dyak.group.4	3	8	-1.41504	-1.48188	2.79313	0.137751	0.223101	0.22246	FALSE
GYPSY16-I_AG	3	8	-1.41504	-1.48188	2.79313	0.137751	0.223101	0.22246	FALSE
dvir.group.8	53	67	-0.338169	-0.405012	1.3241	0.14378	0.23087	0.230773	FALSE
DANA.138.251.PILER-DF.CENTROID	8	15	-0.906891	-0.973733	1.96392	0.144541	0.230773	0.230773	FALSE
DYAK.6.10.PILER-DF.CENTROID	72	53	0.442005	0.375162	0.771019	0.153349	0.243452	0.243452	FALSE
MDG3	82	97	-0.242361	-0.309204	1.23902	0.156092	0.246415	0.246415	FALSE
DANA.2.269.PILER-DF.CENTROID	4	9	-1.16993	-1.23677	2.3567	0.170872	0.267494	0.266492	FALSE
dana.group.2	4	9	-1.16993	-1.23677	2.3567	0.170872	0.267494	0.266492	FALSE
OJ.0.14.PILER-DF.CENTROID	504	440	0.19592	0.129077	0.914416	0.171655	0.266492	0.266492	FALSE
L1-5_CIS	14	7	1	0.933157	0.523711	0.191743	0.296043	0.296043	FALSE
OJ.0.90.PILER-DF.CENTROID	240	257	-0.098734	-0.165577	1.12161	0.209064	0.321022	0.321022	FALSE
dere.group.2	71	54	0.39486	0.328017	0.796631	0.211703	0.323308	0.323308	FALSE
DYAK.15.37.PILER-DF.CENTROID	93	73	0.349334	0.282491	0.82217	0.21506	0.326659	0.326659	FALSE
DANA.60.77.PILER-DF.CENTROID	66	77	-0.222392	-0.289235	1.22199	0.242227	0.365945	0.365945	FALSE
FB4	1147	1146	0.00125835	-0.0655845	1.04651	0.277456	0.416927	0.41569	FALSE
GYPSY11	462	409	0.175792	0.108949	0.927263	0.278113	0.41569	0.41569	FALSE
DYAK.21.49.PILER-DF.CENTROID	5	9	-0.847997	-0.91484	1.88536	0.292164	0.434382	0.434382	FALSE
dyak.group.1	13202	12760	0.0491282	-0.0177147	1.01235	0.323589	0.478571	0.478571	FALSE
dper.group.2	11	6	0.874469	0.807626	0.571321	0.334532	0.490879	0.489601	FALSE
dpse.group.3	11	6	0.874469	0.807626	0.571321	0.334532	0.490879	0.489601	FALSE
dpse.group.5	11	16	-0.540568	-0.607411	1.52352	0.337113	0.490822	0.490822	FALSE
OJ.0.96.PILER-DF.CENTROID	256	264	-0.0443941	-0.111237	1.08015	0.380748	0.551496	0.551496	FALSE
dpse.group.2	52	59	-0.182203	-0.249046	1.18842	0.393303	0.56676	0.56676	FALSE
OJ.31.44.PILER-DF.CENTROID	5	8	-0.678072	-0.744915	1.67588	0.414576	0.594367	0.594367	FALSE
MINOS	17	22	-0.371969	-0.438812	1.35549	0.423641	0.604279	0.604175	FALSE
DYAK.1.33.PILER-DF.CENTROID	9	5	0.847997	0.781154	0.581901	0.425718	0.604175	0.604175	FALSE
OJ.0.99.PILER-DF.CENTROID	16	11	0.540568	0.473726	0.720103	0.445395	0.628924	0.624979	FALSE
DYAK.12.25.PILER-DF.CENTROID	6	9	-0.584963	-0.651805	1.57113	0.445636	0.626118	0.624979	FALSE
S	83	89	-0.100694	-0.167537	1.12314	0.447049	0.624979	0.624979	FALSE
MARINER_DMA	847	839	0.0136912	-0.0531517	1.03753	0.450266	0.626361	0.626361	FALSE
ROOA	612	610	0.00472241	-0.0621204	1.044	0.456993	0.632586	0.632586	FALSE
SAT6	28	21	0.415037	0.348195	0.785567	0.475427	0.654877	0.654877	FALSE
OJ.22.29.PILER-DF.CENTROID	11	7	0.652077	0.585234	0.666541	0.482828	0.661827	0.661827	FALSE
RP1	91	78	0.222392	0.15555	0.89779	0.489858	0.668205	0.663901	FALSE
HELITRON1_AG	24	28	-0.222392	-0.289235	1.22199	0.490829	0.666294	0.663901	FALSE
BUT4	3	5	-0.736966	-0.803808	1.7457	0.498516	0.668655	0.663901	FALSE
DANA.120.207.PILER-DF.CENTROID	3	5	-0.736966	-0.803808	1.7457	0.498516	0.668655	0.663901	FALSE
dvir.group.4	3	5	-0.736966	-0.803808	1.7457	0.498516	0.668655	0.663901	FALSE
OJ.1.54.PILER-DF.CENTROID	3	5	-0.736966	-0.803808	1.7457	0.498516	0.668655	0.663901	FALSE
DANA.95.145.PILER-DF.CENTROID	78	66	0.241008	0.174165	0.88628	0.505195	0.669622	0.669622	FALSE
AGAM.179.263.PILER-DF.CENTROID	79	84	-0.0885367	-0.15538	1.11371	0.530987	0.700504	0.700504	FALSE
DPSE.23.42.PILER-DF.CENTROID	15	11	0.447459	0.380616	0.768109	0.559968	0.735286	0.735286	FALSE
DERE.10.10.PILER-DF.CENTROID	126	129	-0.0339473	-0.10079	1.07236	0.616381	0.805596	0.80196	FALSE
G7	70	73	-0.0605415	-0.127384	1.09231	0.616454	0.80196	0.80196	FALSE
ARS406	7	9	-0.36257	-0.429413	1.34669	0.622405	0.804119	0.802275	FALSE
dvir.group.3	7	9	-0.36257	-0.429413	1.34669	0.622405	0.804119	0.802275	FALSE
DOC6	1328	1246	0.0919511	0.0251082	0.982747	0.664505	0.85263	0.85263	FALSE
DVIR.26.43.PILER-DF.CENTROID	585	544	0.10483	0.0379871	0.974013	0.676868	0.864545	0.864545	FALSE
XDMR	414	384	0.108524	0.0416816	0.971522	0.696977	0.886202	0.87667	FALSE
AGAM.110.111.PILER-DF.CENTROID	351	325	0.111031	0.0441885	0.969835	0.700573	0.886761	0.87667	FALSE
DGRI.46.232.PILER-DF.CENTROID	16	13	0.29956	0.232717	0.85103	0.713234	0.898738	0.87667	FALSE
AGAM.171.241.PILER-DF.CENTROID	3	4	-0.415037	-0.48188	1.39656	0.720679	0.890158	0.87667	FALSE
BS4	3	4	-0.415037	-0.48188	1.39656	0.720679	0.890158	0.87667	FALSE
DANA.101.158.PILER-DF.CENTROID	3	4	-0.415037	-0.48188	1.39656	0.720679	0.890158	0.87667	FALSE
dana.group.18	3	4	-0.415037	-0.48188	1.39656	0.720679	0.890158	0.87667	FALSE
GYPSY1-I_AG	3	4	-0.415037	-0.48188	1.39656	0.720679	0.890158	0.87667	FALSE
HARBINGER1_AG	3	4	-0.415037	-0.48188	1.39656	0.720679	0.890158	0.87667	FALSE
PENELOPE	3	4	-0.415037	-0.48188	1.39656	0.720679	0.890158	0.87667	FALSE
POGO	3	4	-0.415037	-0.48188	1.39656	0.720679	0.890158	0.87667	FALSE
DANA.53.62.PILER-DF.CENTROID	5	3	0.736966	0.670123	0.628453	0.727149	0.878834	0.876948	FALSE
DPSE.45.97.PILER-DF.CENTROID	5	3	0.736966	0.670123	0.628453	0.727149	0.878834	0.876948	FALSE
dpse.group.4	4	5	-0.321928	-0.388771	1.30928	0.748746	0.899135	0.899135	FALSE
GYPSY_DS	21	22	-0.0671142	-0.133957	1.0973	0.763276	0.912684	0.912684	FALSE
DANA.89.131.PILER-DF.CENTROID	7	8	-0.192645	-0.259488	1.19705	0.799824	0.952333	0.952333	FALSE
dana.group.6	8	9	-0.169925	-0.236768	1.17835	0.811046	0.959596	0.95758	FALSE
OJ.7.10.PILER-DF.CENTROID	8	9	-0.169925	-0.236768	1.17835	0.811046	0.959596	0.95758	FALSE
GYPSY7-I_AG	14	12	0.222392	0.15555	0.89779	0.846096	0.994783	0.994783	FALSE
GYPSY10-I_AG	24	24	0	-0.0668428	1.04742	0.886275	1	1	FALSE
dana.group.25	29	29	0	-0.0668428	1.04742	0.896009	1	1	FALSE
GYPSY12A	567	538	0.0757426	0.00889973	0.99385	0.928088	1	1	FALSE
OJ.0.36.PILER-DF.CENTROID	82	80	0.0356239	-0.0312189	1.02188	0.937402	1	1	FALSE
OJ.0.34.PILER-DF.CENTROID	137	132	0.053638	-0.0132049	1.00919	0.951434	1	1	FALSE
OJ.0.61.PILER-DF.CENTROID	149	144	0.0492435	-0.0175993	1.01227	0.953417	1	1	FALSE
DIVER	1174	1119	0.0692224	0.00237954	0.998352	0.983335	1	1	FALSE
1360	3	3	0	-0.0668428	1.04742	1	1	1	FALSE
AGAM.164.224.PILER-DF.CENTROID	3	3	0	-0.0668428	1.04742	1	1	1	FALSE
AGM1-I	3	3	0	-0.0668428	1.04742	1	1	1	FALSE
CR1-1_AG	3	3	0	-0.0668428	1.04742	1	1	1	FALSE
DANA.108.181.PILER-DF.CENTROID	3	3	0	-0.0668428	1.04742	1	1	1	FALSE
DANA.112.186.PILER-DF.CENTROID	3	3	0	-0.0668428	1.04742	1	1	1	FALSE
DANA.133.237.PILER-DF.CENTROID	3	3	0	-0.0668428	1.04742	1	1	1	FALSE
DANA.52.61.PILER-DF.CENTROID	3	3	0	-0.0668428	1.04742	1	1	1	FALSE
DANA.61.83.PILER-DF.CENTROID	3	3	0	-0.0668428	1.04742	1	1	1	FALSE
dere.group.1	3	3	0	-0.0668428	1.04742	1	1	1	FALSE
DPSE.15.25.PILER-DF.CENTROID	3	3	0	-0.0668428	1.04742	1	1	1	FALSE
DPSE.52.108.PILER-DF.CENTROID	3	3	0	-0.0668428	1.04742	1	1	1	FALSE
DPSE.60.117.PILER-DF.CENTROID	3	3	0	-0.0668428	1.04742	1	1	1	FALSE
DPSE.62.119.PILER-DF.CENTROID	3	3	0	-0.0668428	1.04742	1	1	1	FALSE
DSIM.5.5.PILER-DF.CENTROID	3	3	0	-0.0668428	1.04742	1	1	1	FALSE
dwil.group.11	3	3	0	-0.0668428	1.04742	1	1	1	FALSE
OJ.0.66.PILER-DF.CENTROID	3	3	0	-0.0668428	1.04742	1	1	1	FALSE
OJ.1.16.PILER-DF.CENTROID	3	3	0	-0.0668428	1.04742	1	1	1	FALSE
OJ.1.48.PILER-DF.CENTROID	3	3	0	-0.0668428	1.04742	1	1	1	FALSE
OJ.1.77.PILER-DF.CENTROID	3	3	0	-0.0668428	1.04742	1	1	1	FALSE
OJ.23.30.PILER-DF.CENTROID	3	3	0	-0.0668428	1.04742	1	1	1	FALSE
OJ.48.87.PILER-DF.CENTROID	3	3	0	-0.0668428	1.04742	1	1	1	FALSE
OJ.8.25.PILER-DF.CENTROID	3	3	0	-0.0668428	1.04742	1	1	1	FALSE
OJ.8.5.PILER-DF.CENTROID	3	3	0	-0.0668428	1.04742	1	1	1	FALSE
PARIS	3	3	0	-0.0668428	1.04742	1	1	1	FALSE
R2B	3	3	0	-0.0668428	1.04742	1	1	1	FALSE
DANA.143.265.PILER-DF.CENTROID	4	3	0.415037	0.348195	0.785567	1	1	1	FALSE
DPER.20.20.PILER-DF.CENTROID	6	5	0.263034	0.196192	0.872852	1	1	1	FALSE
DPSE.30.63.PILER-DF.CENTROID	13	12	0.115477	0.0486344	0.966851	1	1	1	FALSE
DVIR.30.66.PILER-DF.CENTROID	89	84	0.083416	0.0165732	0.988578	1	1	1	FALSE
DVIR.7.79.PILER-DF.CENTROID	4	3	0.415037	0.348195	0.785567	1	1	1	FALSE
OJ.0.73.PILER-DF.CENTROID	4	3	0.415037	0.348195	0.785567	1	1	1	FALSE
OJ.1.12.PILER-DF.CENTROID	4	4	0	-0.0668428	1.04742	1	1	1	FALSE
OJ.1.50.PILER-DF.CENTROID	4	3	0.415037	0.348195	0.785567	1	1	1	FALSE
RPR	6	6	0	-0.0668428	1.04742	1	1	1	FALSE

## Sheet: Consensus
Transposable Element	value1_W501	value2_Lhr1	log2(Fold_change)	log2(Fold_change) normalized	Normalized Fold Change	p-value	q-value(Benjamini et al. 1995)	q-value(Storey et al. 2003)	Signature(p-value < 0.001)
BATUMI	3952	9936	-1.33008	-1.39693	2.6334	0	0	0	TRUE
BEL	245	6162	-4.65255	-4.71939	26.3437	0	0	0	TRUE
CIRCE	8647	92	6.55442	6.48758	0.0111441	0	0	0	TRUE
DEC1_DS	34893	49532	-0.505423	-0.572266	1.48686	0	0	0	TRUE
dsim.7.7.centroid	198	3826	-4.27226	-4.33911	20.2396	0	0	0	TRUE
NOMAD	262	2034	-2.95668	-3.02352	8.13151	0	0	0	TRUE
notmappingreads	117276835	111918327	0.0674718	0.000628937	0.999564	0	0	0	TRUE
HETA	18	880	-5.61143	-5.67828	51.2073	1.81218e-242	3.73762e-241	2.91012e-241	TRUE
INVADER3	22	622	-4.82134	-4.88818	29.6135	8.13565e-160	1.49154e-158	1.16132e-158	TRUE
ACCORD2	52	722	-3.79542	-3.86226	14.5431	6.90635e-159	1.13955e-157	8.87256e-158	TRUE
ROO	1764	3306	-0.906236	-0.973079	1.96303	9.86127e-122	1.47919e-120	1.1517e-120	TRUE
G5	112	728	-2.70044	-2.76728	6.80824	6.62228e-118	9.10564e-117	7.08968e-117	TRUE
dsim.8.8.centroid	214	926	-2.1134	-2.18024	4.5323	2.07039e-113	2.6278e-112	2.04601e-112	TRUE
RT1B	141	723	-2.3583	-2.42514	5.37082	4.64099e-101	5.46974e-100	4.25876e-100	TRUE
QUASIMODO2	2141	910	1.23435	1.1675	0.445191	5.98766e-101	6.58643e-100	5.12822e-100	TRUE
BARI1	3011	1502	1.00336	0.936515	0.522493	4.62879e-99	4.77344e-98	3.71662e-98	TRUE
BS2	220	809	-1.87864	-1.94548	3.85166	8.85553e-86	8.59508e-85	6.69216e-85	TRUE
MICROPIA	28	375	-3.74339	-3.81023	14.028	1.80008e-82	1.65008e-81	1.28475e-81	TRUE
412	579	1366	-1.23832	-1.30517	2.47112	2.35853e-81	2.04819e-80	1.59473e-80	TRUE
BLOOD	707	165	2.09924	2.0324	0.244448	2.4969e-75	2.05994e-74	1.60388e-74	TRUE
CR1A	661	1428	-1.11127	-1.17812	2.26281	1.71565e-72	1.34801e-71	1.04957e-71	TRUE
HMSBEAGLE	490	1167	-1.25195	-1.31879	2.49457	9.37642e-71	7.03231e-70	5.47538e-70	TRUE
R2	941	1769	-0.910667	-0.97751	1.96906	1.87111e-66	1.34232e-65	1.04514e-65	TRUE
TART	1553	2541	-0.710339	-0.777181	1.71378	1.08514e-64	7.46032e-64	5.80863e-64	TRUE
BURDOCK	197	659	-1.74208	-1.80893	3.50381	9.18996e-64	6.06538e-63	4.72252e-63	TRUE
ZAM	395	966	-1.29017	-1.35701	2.56154	1.63189e-61	1.03562e-60	8.06339e-61	TRUE
DOC2	412	971	-1.23683	-1.30367	2.46856	2.88802e-58	1.7649e-57	1.37416e-57	TRUE
R1	1050	1822	-0.795134	-0.861976	1.81753	1.16013e-55	6.8365e-55	5.32292e-55	TRUE
FW2	37	293	-2.9853	-3.05215	8.29445	2.51001e-53	1.42811e-52	1.11193e-52	TRUE
I	852	1526	-0.84083	-0.907672	1.87602	4.61602e-51	2.53881e-50	1.97673e-50	TRUE
DOC3	422	917	-1.11968	-1.18652	2.27603	9.79716e-48	5.21462e-47	4.06012e-47	TRUE
DIVER2	472	986	-1.0628	-1.12964	2.18805	1.74568e-47	9.00115e-47	7.00832e-47	TRUE
FW	361	826	-1.19414	-1.26099	2.39659	2.8643e-47	1.43215e-46	1.11508e-46	TRUE
TC1	456	950	-1.05889	-1.12574	2.18213	1.39116e-45	6.75121e-45	5.25652e-45	TRUE
JOCKEY2	17	208	-3.61298	-3.67982	12.8155	4.12817e-45	1.94614e-44	1.51527e-44	TRUE
TIRANT	41	256	-2.64245	-2.70929	6.54	1.51374e-41	6.93797e-41	5.40193e-41	TRUE
GTWIN	69	313	-2.18149	-2.24834	4.75135	6.83591e-41	3.04845e-40	2.37353e-40	TRUE
G4	26	213	-3.03427	-3.10111	8.5808	7.3647e-40	3.19783e-39	2.48984e-39	TRUE
COPIA	318	712	-1.16285	-1.22969	2.34517	1.6883e-39	7.14282e-39	5.56143e-39	TRUE
BAGGINS1	281	656	-1.22313	-1.28997	2.44523	2.95677e-39	1.21967e-38	9.49637e-39	TRUE
NINJA	1794	2532	-0.497098	-0.56394	1.4783	2.96392e-37	1.1928e-36	9.28717e-37	TRUE
TAHRE	37	225	-2.60433	-2.67117	6.36946	4.74045e-36	1.86232e-35	1.45001e-35	TRUE
DOC5	83	317	-1.9333	-2.00014	4.00039	6.33947e-36	2.43259e-35	1.89402e-35	TRUE
INVADER2	9	146	-4.0199	-4.08674	16.9915	1.15308e-34	4.32403e-34	3.36671e-34	TRUE
IVK	105	349	-1.73284	-1.79968	3.48143	2.53319e-34	9.28838e-34	7.23197e-34	TRUE
Chimpo	96	326	-1.76377	-1.83061	3.55687	7.87064e-33	2.82316e-32	2.19813e-32	TRUE
GYPSY8	61	259	-2.08607	-2.15291	4.44725	2.12154e-32	7.44797e-32	5.79902e-32	TRUE
1731	4006	4893	-0.288557	-0.3554	1.27934	4.46454e-31	1.53469e-30	1.19491e-30	TRUE
GYPSY12	146	399	-1.45042	-1.51726	2.86248	7.35144e-31	2.47548e-30	1.92742e-30	TRUE
GYPSY7	43	214	-2.3152	-2.38205	5.21275	2.92231e-30	9.64364e-30	7.50857e-30	TRUE
Chouto	278	591	-1.08807	-1.15492	2.22671	3.99716e-30	1.2932e-29	1.00689e-29	TRUE
297	627	1053	-0.747968	-0.814811	1.75907	5.75597e-30	1.82641e-29	1.42205e-29	TRUE
STALKER4	79	276	-1.80474	-1.87159	3.65935	6.54054e-29	2.03621e-28	1.5854e-28	TRUE
Jockey	35	182	-2.37851	-2.44535	5.44659	6.93994e-27	2.12054e-26	1.65106e-26	TRUE
Bica	152	375	-1.30282	-1.36966	2.5841	3.35979e-25	1.00794e-24	7.84783e-25	TRUE
TART_B1	324	608	-0.908078	-0.97492	1.96553	9.05621e-24	2.66835e-23	2.07758e-23	TRUE
dyak.group.1	933	1342	-0.524436	-0.591279	1.50658	3.67116e-22	1.0627e-21	8.27425e-22	TRUE
GYPSY_3	68	217	-1.67409	-1.74093	3.34251	7.15777e-21	2.03626e-20	1.58544e-20	TRUE
BLASTOPIA	1293	1734	-0.423382	-0.490224	1.40466	1.49029e-20	4.16776e-20	3.24503e-20	TRUE
GYPSY4	63	183	-1.53842	-1.60526	3.04251	3.73138e-16	1.02613e-15	7.98949e-16	TRUE
TC1-2	13	89	-2.77529	-2.84214	7.17081	6.06039e-16	1.63928e-15	1.27635e-15	TRUE
COPIA2	267	468	-0.809669	-0.876512	1.83593	7.36528e-16	1.96012e-15	1.52615e-15	TRUE
HOBO	855	1169	-0.451279	-0.518121	1.43209	1.0196e-15	2.67037e-15	2.07916e-15	TRUE
INVADER1	12	78	-2.70044	-2.76728	6.80824	8.07716e-14	2.08239e-13	1.62136e-13	TRUE
GYPSY9	8	67	-3.06609	-3.13293	8.77216	1.50082e-13	3.80978e-13	2.96631e-13	TRUE
dsim.group.1	77	181	-1.23306	-1.2999	2.46212	5.5127e-12	1.37818e-11	1.07305e-11	TRUE
Transib1	60	155	-1.36923	-1.43608	2.70584	6.07023e-12	1.49491e-11	1.16394e-11	TRUE
RT1C	324	502	-0.631694	-0.698536	1.62286	7.21291e-12	1.75019e-11	1.3627e-11	TRUE
dsim.4.4.centroid	272	427	-0.650629	-0.717472	1.6443	1.02434e-10	2.44951e-10	1.9072e-10	TRUE
INVADER6	1654	1240	0.415619	0.348776	0.78525	1.0535e-10	2.48326e-10	1.93348e-10	TRUE
RT1A	30	94	-1.6477	-1.71454	3.28192	1.22801e-09	2.85383e-09	2.222e-09	TRUE
TRANSPAC	635	418	0.603254	0.536411	0.689484	2.94766e-09	6.75506e-09	5.25951e-09	TRUE
IDEFIX	428	585	-0.450826	-0.517669	1.43164	1.42849e-08	3.22877e-08	2.51393e-08	TRUE
R1-2	5	41	-3.03562	-3.10247	8.58886	1.54989e-08	3.45584e-08	2.69073e-08	TRUE
ACCORD	1425	1091	0.385311	0.318468	0.801921	4.0356e-08	8.87832e-08	6.91269e-08	TRUE
M4	28	80	-1.51457	-1.58142	2.99263	1.16188e-07	2.5225e-07	1.96403e-07	TRUE
dyak.16.38.centroid	160	74	1.11247	1.04563	0.484433	1.27842e-07	2.73947e-07	2.13296e-07	TRUE
GYPSY6A	17	61	-1.84327	-1.91012	3.7584	1.55074e-07	3.2804e-07	2.55413e-07	TRUE
dsim.group.2	228	340	-0.576501	-0.643344	1.56195	1.74532e-07	3.64529e-07	2.83823e-07	TRUE
BS	5	35	-2.80735	-2.8742	7.33195	5.32862e-07	1.09903e-06	8.55707e-07	TRUE
agam.220.342.centroid	6196	5391	0.200784	0.133941	0.911338	6.30175e-07	1.28369e-06	9.99485e-07	TRUE
INVADER4	27	74	-1.45457	-1.52141	2.87071	7.08963e-07	1.42657e-06	1.11073e-06	TRUE
G2	14	52	-1.89308	-1.95993	3.89042	7.89265e-07	1.56902e-06	1.22165e-06	TRUE
GYPSY5	59	121	-1.03622	-1.10306	2.1481	9.62576e-07	1.89077e-06	1.47216e-06	TRUE
MDG1	112	186	-0.731804	-0.798647	1.73947	3.12646e-06	6.06901e-06	4.72536e-06	TRUE
GYPSY11	4	29	-2.85798	-2.92482	7.59381	4.31986e-06	8.2881e-06	6.45314e-06	TRUE
dyak.group.3	93	159	-0.773724	-0.840567	1.79075	6.73337e-06	1.27702e-05	9.94292e-06	TRUE
PROTOP_B	71	129	-0.86148	-0.928323	1.90306	1.00107e-05	1.877e-05	1.46144e-05	TRUE
G5A	362	467	-0.367433	-0.434276	1.35123	1.60827e-05	2.98162e-05	2.3215e-05	TRUE
DOC6	2797	2375	0.235953	0.16911	0.889391	2.65244e-05	4.8628e-05	3.78619e-05	TRUE
G6	318	415	-0.384085	-0.450927	1.36692	2.88074e-05	5.22333e-05	4.0669e-05	TRUE
dpse.32.71.centroid	248	157	0.659576	0.592733	0.663086	5.38155e-05	9.6517e-05	7.51485e-05	TRUE
ROOA	411	508	-0.30569	-0.372533	1.29462	9.73315e-05	0.000172685	0.000134453	TRUE
GYPSY10	42	83	-0.982722	-1.04956	2.06991	0.000102989	0.000180779	0.000140755	TRUE
MAX	18919	17350	0.1249	0.0580573	0.960557	0.000128512	0.000223205	0.000173788	TRUE
TABOR	28	62	-1.14684	-1.21368	2.31929	0.000186967	0.00032135	0.000250204	TRUE
TOM1	3	20	-2.73697	-2.80381	6.98281	0.000213748	0.000363592	0.000283094	TRUE
PEN4	1100	1221	-0.15056	-0.217403	1.16264	0.000301305	0.0005073	0.000394985	TRUE
dsec.12.12.centroid	326	404	-0.309483	-0.376326	1.29803	0.000493215	0.000822025	0.000640031	TRUE
STALKER2	9	30	-1.73697	-1.80381	3.49141	0.00057022	0.000940862	0.000732559	TRUE
dyak.20.48.centroid	146	88	0.730393	0.66355	0.631323	0.000644024	0.00105212	0.000819184	TRUE
PROTOP	63	102	-0.695145	-0.761988	1.69583	0.00101477	0.00164154	0.00127811	FALSE
TRANSIB2	417	486	-0.220909	-0.287752	1.22074	0.00303035	0.00485444	0.00377969	FALSE
DOC4	36	63	-0.807355	-0.874198	1.83299	0.00343564	0.00545077	0.00424399	FALSE
BS3	162	205	-0.33963	-0.406473	1.32544	0.00768574	0.0120776	0.00940366	FALSE
dsec.7.7.centroid	6	19	-1.66297	-1.72981	3.31684	0.0081959	0.0127578	0.00993324	FALSE
5S	95	59	0.687213	0.62037	0.650504	0.0097416	0.0150221	0.0116963	FALSE
G	12	27	-1.16993	-1.23677	2.3567	0.015186	0.0232008	0.0180642	FALSE
Transib5	62	88	-0.505235	-0.572078	1.48666	0.0176809	0.0267647	0.0208391	FALSE
FROGGER	13	28	-1.10692	-1.17376	2.25599	0.0180061	0.0270091	0.0209893	FALSE
NTS	107	139	-0.377474	-0.444317	1.36067	0.0181351	0.0269576	0.0209893	FALSE
FW3	6	17	-1.5025	-1.56934	2.9677	0.0203579	0.0299916	0.0233516	FALSE
XDMR	26	11	1.24101	1.17417	0.44314	0.0212935	0.0310923	0.0242086	FALSE
PEN1	13491	13247	0.0263316	-0.0405112	1.02848	0.0217854	0.0315315	0.0245505	FALSE
HELENA	63	88	-0.482152	-0.548995	1.46307	0.0224602	0.0322254	0.0250908	FALSE
agam.group.37	18	6	1.58496	1.51812	0.349141	0.0235101	0.033441	0.0260373	FALSE
MARINER2	288	330	-0.196397	-0.26324	1.20017	0.0242214	0.0341583	0.0265958	FALSE
dyak.15.37.centroid	25	11	1.18442	1.11758	0.460866	0.0303455	0.0424323	0.033038	FALSE
dyak.12.25.centroid	6	15	-1.32193	-1.38877	2.61856	0.0483257	0.0670062	0.0521712	FALSE
dgri.169.80.centroid	5670	5616	0.0138058	-0.053037	1.03745	0.0512859	0.0705182	0.0549057	FALSE
GYPSY	111	135	-0.2824	-0.349243	1.27389	0.0642213	0.0875744	0.0681858	FALSE
PEN2	306	250	0.291604	0.224761	0.855737	0.0682312	0.09228	0.0718495	FALSE
TOM	12	4	1.58496	1.51812	0.349141	0.0780645	0.104721	0.0815359	FALSE
dpse.41.89.centroid	30857	29883	0.0462728	-0.02057	1.01436	0.0795053	0.105793	0.0823711	FALSE
ROVER	14	23	-0.716207	-0.78305	1.72076	0.137924	0.18206	0.141753	FALSE
INVADER5	4	9	-1.16993	-1.23677	2.3567	0.170872	0.223762	0.174222	FALSE
GYPSY12A	43	53	-0.301656	-0.368499	1.29101	0.221756	0.288108	0.223343	FALSE
GYPSY2	23	31	-0.430634	-0.497477	1.41174	0.222527	0.286851	0.223343	FALSE
agam.group.17	8	3	1.41504	1.34819	0.392783	0.227945	0.291557	0.227008	FALSE
S2	43	31	0.472068	0.405226	0.755118	0.246419	0.312762	0.243518	FALSE
LOOPER1	3	6	-1	-1.06684	2.09484	0.333422	0.419959	0.325584	FALSE
SAR2	11	6	0.874469	0.807626	0.571321	0.334532	0.418165	0.325584	FALSE
Transib4	64	72	-0.169925	-0.236768	1.17835	0.346692	0.430107	0.334883	FALSE
FB4	319	327	-0.0357342	-0.102577	1.07369	0.386609	0.476048	0.370653	FALSE
PROTOP_A	3	5	-0.736966	-0.803808	1.7457	0.498516	0.60705	0.470913	FALSE
QUASIMODO	3	5	-0.736966	-0.803808	1.7457	0.498516	0.60705	0.470913	FALSE
TRANSIB3	34	38	-0.160465	-0.227308	1.17065	0.556155	0.669822	0.521526	FALSE
176	16	12	0.415037	0.348195	0.785567	0.574497	0.686899	0.534822	FALSE
BS4	3	4	-0.415037	-0.48188	1.39656	0.720679	0.846349	0.65201	FALSE
G3	3	4	-0.415037	-0.48188	1.39656	0.720679	0.846349	0.65201	FALSE
RP1	3	4	-0.415037	-0.48188	1.39656	0.720679	0.846349	0.65201	FALSE
SAR	3	4	-0.415037	-0.48188	1.39656	0.720679	0.846349	0.65201	FALSE
Gypsy2	39	41	-0.0721498	-0.138993	1.10114	0.73751	0.850973	0.662571	FALSE
dvir.group.4	19	21	-0.14439	-0.211233	1.15768	0.75224	0.861941	0.671111	FALSE
S	7	5	0.485427	0.418584	0.748159	0.775139	0.882055	0.682345	FALSE
MARINER_DMA	1070	1008	0.0861152	0.0192723	0.98673	0.775455	0.876371	0.682345	FALSE
PLACW	127	117	0.11832	0.0514771	0.964948	0.798088	0.895813	0.697483	FALSE
TART_DV	330	310	0.0901978	0.023355	0.983942	0.843389	0.940265	0.732094	FALSE
agam.16.244.centroid	3	3	0	-0.0668428	1.04742	1	1	0.778604	FALSE
dana.group.12	3	3	0	-0.0668428	1.04742	1	1	0.778604	FALSE
dmel.33.45.centroid	3	3	0	-0.0668428	1.04742	1	1	0.778604	FALSE
DOC	3	3	0	-0.0668428	1.04742	1	1	0.778604	FALSE
dper.group.3	3	3	0	-0.0668428	1.04742	1	1	0.778604	FALSE
dpse.63.120.centroid	3	3	0	-0.0668428	1.04742	1	1	0.778604	FALSE
dvir.3.94.centroid	3	3	0	-0.0668428	1.04742	1	1	0.778604	FALSE
HETRP	3	3	0	-0.0668428	1.04742	1	1	0.778604	FALSE
HMR2	3	3	0	-0.0668428	1.04742	1	1	0.778604	FALSE
MINOS	3	3	0	-0.0668428	1.04742	1	1	0.778604	FALSE
RSP	3	3	0	-0.0668428	1.04742	1	1	0.778604	FALSE
TLD2	3	3	0	-0.0668428	1.04742	1	1	0.778604	FALSE
agam.110.111.centroid	5	5	0	-0.0668428	1.04742	1	1	0.778604	FALSE
DIVER	1388	1326	0.0659268	-0.000916043	1.00064	1	1	0.778604	FALSE
G7	4	4	0	-0.0668428	1.04742	1	1	0.778604	FALSE
Gypsy1	4	3	0.415037	0.348195	0.785567	1	1	0.778604	FALSE
MINIME_DN	4	3	0.415037	0.348195	0.785567	1	1	0.778604	FALSE
