# Supplementary material for: The Hmr and Lhr Hybrid Incompatibility Genes Suppress a Broad Range of Heterochromatic Repeats
Source: PLoS Genet. 2014 Mar 20;10(3):e1004240. doi: 10.1371/journal.pgen.1004240 (PMC3961192; doi:10.1371/journal.pgen.1004240)
Supplement: Table S15 — DEG-seq output measuring the statistical significance of the differences in TE expression of male larvae between D. melanogaster and D. melanogaster- D. simulans hybrids (Sheets A and B), and between D. simulans and D. melanogaster-D. simulans hybrids (Sheets C and D). Unique reads were mapped to the individual-insertion (Sheets A and C) and consensus-sequence (Sheets B and D) TE databases, allowing for up to 3 mismatches. (XLSX) [file pgen.1004240.s020.xlsx]

## Sheet: A
Transposable Element	value1 (D. melanogaster)	value2 (Hybrids)	log2(Fold_change)	log2(Fold_change) normalized	Normalized Fold Change	p-value	q-value(Benjamini et al. 1995)	q-value(Storey et al. 2003)	Signature(p-value < 0.001)
1731	11847	4031	1.55531	1.51106	0.350854	0	0	0	TRUE
3S18	4728	1583	1.57857	1.53432	0.345243	0	0	0	TRUE
ACCORD	4647	87154	-4.2292	-4.27345	19.3391	0	0	0	TRUE
COPIA	445912	1880159	-2.07602	-2.12028	4.34777	0	0	0	TRUE
MAX	637	6700	-3.3948	-3.43905	10.8457	0	0	0	TRUE
MDG1	1911	11876	-2.63565	-2.6799	6.40812	0	0	0	TRUE
RT1C	64	1602	-4.64566	-4.68991	25.811	0	0	0	TRUE
TART_B1	26	1450	-5.8014	-5.84565	57.5064	0	0	0	TRUE
unmapped	33384195	30820847	0.115259	0.0710058	0.951974	0	0	0	TRUE
FLEA	1945	4748	-1.28755	-1.3318	2.51717	3.57094e-284	7.85607e-283	7.85607e-283	TRUE
BATUMI	361	1945	-2.4297	-2.47395	5.55564	2.02308e-272	4.04616e-271	4.04616e-271	TRUE
GYPSY5	27	1029	-5.25214	-5.29639	39.2982	7.3141e-272	1.34092e-270	1.34092e-270	TRUE
R1	182	1447	-2.99105	-3.03531	8.1982	2.96351e-253	5.01517e-252	5.01517e-252	TRUE
CR1	236	1426	-2.59512	-2.63937	6.23059	1.49458e-215	2.34862e-214	2.34862e-214	TRUE
GYPSY	501	1924	-1.94123	-1.98548	3.95994	2.75594e-205	4.04204e-204	4.04204e-204	TRUE
BLOOD	9265	5400	0.778832	0.734579	0.600994	4.33658e-201	5.9628e-200	5.9628e-200	TRUE
HAT1	3	615	-7.67948	-7.72373	211.386	2.81211e-183	3.6392e-182	3.6392e-182	TRUE
DVIR.6.62.PILER-DF.CENTROID	172	933	-2.43947	-2.48372	5.59338	3.46772e-132	4.23833e-131	4.23833e-131	TRUE
SPRINGER	833	1932	-1.21371	-1.25796	2.39157	5.5575e-107	6.435e-106	6.435e-106	TRUE
DIVER2	20	397	-4.31107	-4.35532	20.4683	9.16231e-95	1.00785e-93	1.00785e-93	TRUE
HETA	137	688	-2.32823	-2.37249	5.17833	6.56331e-93	6.87585e-92	6.87585e-92	TRUE
dmow.group.3	2	286	-7.15987	-7.20412	147.454	1.19827e-84	1.19827e-83	1.19827e-83	TRUE
MICROPIA	93	538	-2.5323	-2.57656	5.96514	3.74017e-80	3.57756e-79	3.57756e-79	TRUE
TART	1193	2199	-0.882254	-0.926507	1.90067	1.10454e-74	1.01249e-73	1.01249e-73	TRUE
dsim.group.1	2	253	-6.98299	-7.02725	130.44	1.24762e-74	1.09791e-73	1.09791e-73	TRUE
IDEFIX	123	541	-2.13697	-2.18122	4.53538	2.47156e-66	2.09132e-65	2.09132e-65	TRUE
412	2872	4204	-0.549707	-0.59396	1.50938	4.60003e-66	3.74817e-65	3.74817e-65	TRUE
INVADER6	15	270	-4.16993	-4.21418	18.5607	1.57195e-63	1.2351e-62	1.2351e-62	TRUE
BAGGINS1	21	262	-3.64111	-3.68536	12.8648	8.30269e-56	6.29859e-55	6.29859e-55	TRUE
RT1	28165	23815	0.242033	0.19778	0.871891	7.03829e-55	5.16141e-54	5.16141e-54	TRUE
POGO	708	230	1.62212	1.57786	0.334978	4.01243e-54	2.84753e-53	2.84753e-53	TRUE
297	147	522	-1.82823	-1.87249	3.66163	7.63858e-53	5.25152e-52	5.25152e-52	TRUE
DVIR.3.94.PILER-DF.CENTROID	9	204	-4.5025	-4.54675	23.3727	1.39431e-50	9.29539e-50	9.29539e-50	TRUE
176	715	1249	-0.804758	-0.849011	1.80127	1.79257e-37	1.1599e-36	1.1599e-36	TRUE
INVADER2	43	245	-2.51037	-2.55463	5.87515	5.22713e-37	3.28563e-36	3.28563e-36	TRUE
R2	104	340	-1.70895	-1.7532	3.37106	4.30203e-32	2.62902e-31	2.62902e-31	TRUE
HETRP	197	28	2.8147	2.77044	0.146559	1.47288e-31	8.75767e-31	8.75767e-31	TRUE
DANA.69.95.PILER-DF.CENTROID	2	110	-5.78136	-5.82561	56.7132	3.45495e-31	2.00024e-30	2.00024e-30	TRUE
ZAM	49	232	-2.24327	-2.28752	4.88218	5.32725e-31	3.00512e-30	3.00512e-30	TRUE
COPIA2	63	255	-2.01707	-2.06133	4.1737	5.07305e-30	2.79018e-29	2.79018e-29	TRUE
MARINER2	26	177	-2.76717	-2.81142	7.01975	5.22639e-30	2.8044e-29	2.8044e-29	TRUE
TIRANT	7	105	-3.90689	-3.95114	15.4672	1.76331e-24	9.23638e-24	9.23638e-24	TRUE
DERE.10.10.PILER-DF.CENTROID	2	84	-5.39232	-5.43657	43.3083	1.76407e-23	9.02548e-23	9.02548e-23	TRUE
HMSBEAGLE	173	398	-1.202	-1.24625	2.37224	4.61832e-23	2.30916e-22	2.30916e-22	TRUE
GYPSY12	8	99	-3.62936	-3.67361	12.7605	5.8233e-22	2.84694e-21	2.84694e-21	TRUE
NOMAD	1351	888	0.605396	0.561143	0.677765	9.58721e-20	4.58519e-19	4.58519e-19	TRUE
TRANSIB2	29	140	-2.2713	-2.31555	4.97796	1.33227e-19	6.23615e-19	6.23615e-19	TRUE
BURDOCK	1343	1796	-0.419328	-0.463581	1.37896	3.74373e-19	1.71588e-18	1.71588e-18	TRUE
ACCORD2	48	173	-1.84967	-1.89392	3.71643	1.25753e-18	5.64607e-18	5.64607e-18	TRUE
OSVALDO	9	82	-3.18763	-3.23188	9.39491	1.25551e-16	5.52426e-16	5.52426e-16	TRUE
GYPSY3	5	71	-3.82782	-3.87207	14.6423	1.44886e-16	6.24998e-16	6.24998e-16	TRUE
INVADER4	42	148	-1.81714	-1.86139	3.63357	7.11554e-16	3.01042e-15	3.01042e-15	TRUE
HELITRON2_AG	2	58	-4.85798	-4.90223	29.9033	7.95311e-16	3.30129e-15	3.30129e-15	TRUE
INVADER3	156	322	-1.04551	-1.08977	2.1284	1.29963e-15	5.29477e-15	5.29477e-15	TRUE
DIVER	781	480	0.702288	0.658035	0.633741	1.91125e-15	7.645e-15	7.645e-15	TRUE
GYPSY12A	21	102	-2.28011	-2.32436	5.00844	1.22761e-14	4.82276e-14	4.82276e-14	TRUE
ULYSSES	3	56	-4.22239	-4.26665	19.2481	3.3253e-14	1.28345e-13	1.28345e-13	TRUE
TC1	152	300	-0.980891	-1.02514	2.03516	2.56752e-13	9.73887e-13	9.73887e-13	TRUE
GYPSY11	7	64	-3.19265	-3.2369	9.42765	4.23408e-13	1.57881e-12	1.57881e-12	TRUE
DSIM.7.7.PILER-DF.CENTROID	2	48	-4.58496	-4.62922	24.7476	6.49806e-13	2.38262e-12	2.38262e-12	TRUE
dsim.group.2	2	47	-4.55459	-4.59884	24.232	1.26619e-12	4.56659e-12	4.56659e-12	TRUE
GYPSY8	52	147	-1.49923	-1.54349	2.91498	2.17732e-12	7.72599e-12	7.72599e-12	TRUE
dyak.group.1	2931	3372	-0.202212	-0.246465	1.1863	1.29752e-11	4.53101e-11	4.53101e-11	TRUE
dvir.group.5	13	69	-2.40808	-2.45234	5.47302	5.55289e-11	1.90881e-10	1.90881e-10	TRUE
NINJA	276	143	0.948653	0.9044	0.534255	5.55643e-10	1.88064e-09	1.86544e-09	TRUE
DGRI.6.273.PILER-DF.CENTROID	89	187	-1.07116	-1.11541	2.16657	5.59633e-10	1.86544e-09	1.86544e-09	TRUE
MARINER_DMA	2	36	-4.16993	-4.21418	18.5607	1.83828e-09	6.03615e-09	6.03615e-09	TRUE
TRANSPAC	2751	3074	-0.160161	-0.204414	1.15222	6.62881e-08	2.14462e-07	2.14462e-07	TRUE
DOC5	4	36	-3.16993	-3.21418	9.28034	7.27365e-08	2.31914e-07	2.31914e-07	TRUE
GTWIN	131	225	-0.780358	-0.824611	1.77106	1.3078e-07	4.11024e-07	4.11024e-07	TRUE
FW2	3	32	-3.41504	-3.45929	10.9989	1.62417e-07	5.03264e-07	5.03264e-07	TRUE
AGAM.179.263.PILER-DF.CENTROID	2	28	-3.80735	-3.85161	14.4361	3.33894e-07	1.02023e-06	1.02023e-06	TRUE
DYAK.20.48.PILER-DF.CENTROID	151	245	-0.698233	-0.742486	1.67306	5.70381e-07	1.71896e-06	1.71896e-06	TRUE
BS3	18	58	-1.68806	-1.73231	3.32259	1.62799e-06	4.83997e-06	4.83997e-06	TRUE
G2	41	95	-1.2123	-1.25656	2.38925	1.73425e-06	5.08714e-06	5.08714e-06	TRUE
dana.group.5	224	129	0.796128	0.751875	0.593831	1.92214e-06	5.5641e-06	5.5641e-06	TRUE
GYPSY2	14	51	-1.86507	-1.90932	3.75633	2.31092e-06	6.60263e-06	6.60263e-06	TRUE
dmow.group.6	1155	1345	-0.219713	-0.263966	1.20078	5.03982e-06	1.42149e-05	1.42149e-05	TRUE
TABOR	72	129	-0.841302	-0.885555	1.84748	2.11423e-05	5.88772e-05	5.86714e-05	TRUE
J1	26	65	-1.32193	-1.36618	2.57787	2.13351e-05	5.86714e-05	5.86714e-05	TRUE
DOC	147	223	-0.601228	-0.645481	1.56426	2.3713e-05	6.44057e-05	6.37018e-05	TRUE
PROTOP_B	344	451	-0.390719	-0.434972	1.35188	2.37434e-05	6.37018e-05	6.37018e-05	TRUE
I	260	170	0.612977	0.568724	0.674213	5.97996e-05	0.000158505	0.000158505	TRUE
PROTOP_A	193	121	0.673594	0.629341	0.646472	0.000149718	0.000392118	0.000392118	TRUE
DVIR.35.83.PILER-DF.CENTROID	9	32	-1.83007	-1.87433	3.66631	0.000231809	0.000599977	0.000599977	TRUE
DANA.135.241.PILER-DF.CENTROID	51	92	-0.851137	-0.89539	1.86011	0.000303248	0.00077575	0.00077575	TRUE
TC1-2	2	17	-3.08746	-3.13172	8.76477	0.000337308	0.000852963	0.000852963	TRUE
INVADER1	13	38	-1.54749	-1.59174	3.01413	0.000358307	0.000895767	0.000895767	TRUE
dvir.group.8	12	36	-1.58496	-1.62922	3.09345	0.000410202	0.00101398	0.00100727	TRUE
TOM	3	19	-2.66297	-2.70722	6.53061	0.000412066	0.00100727	0.00100727	TRUE
HOBO	83	131	-0.658384	-0.702637	1.62748	0.000470026	0.00113633	0.00113633	TRUE
SAR	106	158	-0.57586	-0.620113	1.537	0.000555586	0.00132858	0.00132858	TRUE
dvir.group.9	2	16	-3	-3.04425	8.24919	0.000618964	0.00145639	0.00144864	TRUE
GYPSY7-I_AG	2	16	-3	-3.04425	8.24919	0.000618964	0.00145639	0.00144864	TRUE
TRANSIB1	4	20	-2.32193	-2.36618	5.15575	0.000781476	0.00180973	0.00180973	TRUE
GYPSY7	17	42	-1.30485	-1.34911	2.54754	0.000960715	0.00220164	0.00220164	TRUE
OJ.0.64.PILER-DF.CENTROID	11	32	-1.54057	-1.58482	2.99971	0.00111506	0.002529	0.00251078	FALSE
DANA.88.129.PILER-DF.CENTROID	2	15	-2.90689	-2.95114	7.73362	0.00112985	0.00252353	0.00251078	FALSE
DYAK.15.37.PILER-DF.CENTROID	2	15	-2.90689	-2.95114	7.73362	0.00112985	0.00252353	0.00251078	FALSE
ALUII	3	17	-2.5025	-2.54675	5.84318	0.00128904	0.0028359	0.0028359	FALSE
FB4	198	260	-0.393011	-0.437264	1.35403	0.00145698	0.00317361	0.00317361	FALSE
BS	37	68	-0.878009	-0.922262	1.89508	0.00167286	0.00360814	0.00360814	FALSE
GYPSY4	63	99	-0.652077	-0.69633	1.62038	0.00273994	0.0058523	0.0058523	FALSE
HELENA	2	13	-2.70044	-2.74469	6.70247	0.00369681	0.00782017	0.00782017	FALSE
FW3	14	33	-1.23704	-1.28129	2.43057	0.00505223	0.0105856	0.0105856	FALSE
G4	23	45	-0.968291	-1.01254	2.01747	0.00521969	0.0108333	0.0108333	FALSE
DANA.48.51.PILER-DF.CENTROID	27	50	-0.888969	-0.933222	1.90954	0.00610294	0.0125481	0.0125481	FALSE
DOC6	968	827	0.22712	0.182867	0.880951	0.00762907	0.0155407	0.0155407	FALSE
G	6	19	-1.66297	-1.70722	3.26531	0.00849307	0.017142	0.017142	FALSE
S	63	93	-0.561879	-0.606132	1.52217	0.0102638	0.0205275	0.0205275	FALSE
XDMR	77	109	-0.501398	-0.545651	1.45968	0.0124541	0.0246837	0.0246837	FALSE
G6	2	10	-2.32193	-2.36618	5.15575	0.0206486	0.0405597	0.0405597	FALSE
JOCKEY2	14	29	-1.05063	-1.09488	2.13595	0.0212325	0.0413376	0.0413376	FALSE
agam.group.37	162	119	0.445032	0.400779	0.757449	0.0232318	0.0448333	0.0448333	FALSE
GYPSY6	59	83	-0.492396	-0.536649	1.4506	0.0291362	0.0557387	0.0557387	FALSE
QUASIMODO	660	719	-0.123526	-0.167779	1.12333	0.0312026	0.0591773	0.0591773	FALSE
G3	3	11	-1.87447	-1.91872	3.78088	0.0326998	0.0614868	0.0614868	FALSE
GYPSY6A	2	9	-2.16993	-2.21418	4.64017	0.0359104	0.0669515	0.0669515	FALSE
agam.group.17	145	108	0.425022	0.380769	0.768028	0.0380727	0.0703865	0.0703865	FALSE
G7	5	14	-1.48543	-1.52968	2.88722	0.0387479	0.0710378	0.0710378	FALSE
OJ.0.14.PILER-DF.CENTROID	102	72	0.5025	0.458247	0.72787	0.0405933	0.0738061	0.0738061	FALSE
DOC3	141	172	-0.286713	-0.330966	1.25786	0.0477077	0.0860303	0.0860303	FALSE
DPSE.52.108.PILER-DF.CENTROID	2	8	-2	-2.04425	4.1246	0.0616639	0.110293	0.110293	FALSE
DPSE.30.63.PILER-DF.CENTROID	14	5	1.48543	1.44117	0.368268	0.0641524	0.113819	0.113819	FALSE
GYPSY16-I_AG	10	20	-1	-1.04425	2.0623	0.0674167	0.118653	0.118653	FALSE
ROO	1806	1859	-0.0417289	-0.0859818	1.06141	0.071753	0.125283	0.125283	FALSE
DOC2	60	79	-0.39689	-0.441143	1.35768	0.0752591	0.13037	0.13037	FALSE
SAT6	7	15	-1.09954	-1.14379	2.20961	0.0889544	0.15289	0.15289	FALSE
M4	23	12	0.938599	0.894347	0.537991	0.0908447	0.154929	0.154929	FALSE
BS2	172	199	-0.21036	-0.254613	1.19302	0.0965126	0.163329	0.163329	FALSE
dpse.group.7	2	7	-1.80735	-1.85161	3.60902	0.104314	0.175184	0.175184	FALSE
GYPSY10	96	116	-0.273018	-0.317271	1.24597	0.114408	0.19068	0.19068	FALSE
TLD2	6	12	-1	-1.04425	2.0623	0.161406	0.266987	0.266987	FALSE
DOC4	9	16	-0.830075	-0.874328	1.83315	0.16331	0.268121	0.268121	FALSE
DANA.26.173.PILER-DF.CENTROID	2	6	-1.58496	-1.62922	3.09345	0.17334	0.279375	0.276339	FALSE
DANA.78.111.PILER-DF.CENTROID	2	6	-1.58496	-1.62922	3.09345	0.17334	0.279375	0.276339	FALSE
dere.group.1	2	6	-1.58496	-1.62922	3.09345	0.17334	0.279375	0.276339	FALSE
NTS	2	6	-1.58496	-1.62922	3.09345	0.17334	0.279375	0.276339	FALSE
TRANSIB3	40	52	-0.378512	-0.422765	1.34049	0.175731	0.278136	0.278136	FALSE
DPSE.58.115.PILER-DF.CENTROID	7	2	1.80735	1.7631	0.294614	0.18015	0.283094	0.283094	FALSE
RT1B	258	280	-0.118056	-0.162309	1.11908	0.196004	0.305822	0.305822	FALSE
dpse.group.5	5	10	-1	-1.04425	2.0623	0.203845	0.315817	0.315817	FALSE
GYPSY9	2	5	-1.32193	-1.36618	2.57787	0.281865	0.432127	0.430626	FALSE
OJ.13.4.PILER-DF.CENTROID	2	5	-1.32193	-1.36618	2.57787	0.281865	0.432127	0.430626	FALSE
P_DG	11	6	0.874469	0.830216	0.562445	0.333282	0.50567	0.50567	FALSE
MINOS	14	9	0.63743	0.593177	0.662882	0.406155	0.612014	0.612014	FALSE
AGAM.164.224.PILER-DF.CENTROID	2	4	-1	-1.04425	2.0623	0.446215	0.656638	0.645838	FALSE
dana.group.25	2	4	-1	-1.04425	2.0623	0.446215	0.656638	0.645838	FALSE
DSIM.8.8.PILER-DF.CENTROID	2	4	-1	-1.04425	2.0623	0.446215	0.656638	0.645838	FALSE
DYAK.1.33.PILER-DF.CENTROID	2	4	-1	-1.04425	2.0623	0.446215	0.656638	0.645838	FALSE
GYPSY_DS	2	4	-1	-1.04425	2.0623	0.446215	0.656638	0.645838	FALSE
OJ.31.44.PILER-DF.CENTROID	2	4	-1	-1.04425	2.0623	0.446215	0.656638	0.645838	FALSE
CIRCE	35	28	0.321928	0.277675	0.824919	0.453322	0.651836	0.647872	FALSE
OJ.0.34.PILER-DF.CENTROID	5	2	1.32193	1.27768	0.41246	0.453511	0.647872	0.647872	FALSE
G5A	208	216	-0.0544478	-0.0987007	1.07081	0.496681	0.704966	0.704966	FALSE
BARI1	3	5	-0.736966	-0.781219	1.71858	0.501468	0.707198	0.706888	FALSE
RP1	12	8	0.584963	0.54071	0.687433	0.504461	0.706888	0.706888	FALSE
LOOPER1	6	3	1	0.955747	0.515575	0.508275	0.707725	0.707725	FALSE
ROOA	474	480	-0.0181473	-0.0624003	1.0442	0.51729	0.715747	0.715747	FALSE
OJ.24.31.PILER-DF.CENTROID	7	4	0.807355	0.763102	0.589228	0.549358	0.755368	0.755368	FALSE
DYAK.6.10.PILER-DF.CENTROID	5	7	-0.485427	-0.52968	1.44361	0.575631	0.786577	0.786577	FALSE
G5	104	109	-0.0677446	-0.111998	1.08072	0.584103	0.793227	0.793227	FALSE
TOM1	218	223	-0.0327156	-0.0769685	1.0548	0.600438	0.810407	0.810407	FALSE
S2	24	20	0.263034	0.218781	0.859291	0.653279	0.87635	0.87635	FALSE
FW	503	502	0.00287104	-0.0413819	1.0291	0.658801	0.878401	0.878401	FALSE
PROTOP	246	229	0.103311	0.0590578	0.959891	0.67968	0.900781	0.883697	FALSE
dere.group.2	2	3	-0.584963	-0.629215	1.54672	0.682857	0.891564	0.883697	FALSE
HELITRON	2	3	-0.584963	-0.629215	1.54672	0.682857	0.891564	0.883697	FALSE
L1-5_CIS	2	3	-0.584963	-0.629215	1.54672	0.682857	0.891564	0.883697	FALSE
OJ.0.61.PILER-DF.CENTROID	2	3	-0.584963	-0.629215	1.54672	0.682857	0.891564	0.883697	FALSE
HARBINGER1_AG	3	4	-0.415037	-0.45929	1.37487	0.722565	0.929616	0.927665	FALSE
OJ.0.51.PILER-DF.CENTROID	15	17	-0.180572	-0.224825	1.16864	0.725265	0.927665	0.927665	FALSE
RPR	4	5	-0.321928	-0.366181	1.28894	0.750367	0.954224	0.954224	FALSE
STALKER2	74	75	-0.0193653	-0.0636183	1.04508	0.80625	1	1	FALSE
DANA.138.251.PILER-DF.CENTROID	20	21	-0.0703893	-0.114642	1.08271	0.876321	1	1	FALSE
TRANSIB4	28	26	0.106915	0.0626623	0.957496	0.892607	1	1	FALSE
1360	2	2	0	-0.044253	1.03115	1	1	1	FALSE
AGAM.133.158.PILER-DF.CENTROID	2	2	0	-0.044253	1.03115	1	1	1	FALSE
BEL18	2	2	0	-0.044253	1.03115	1	1	1	FALSE
BS4	2	2	0	-0.044253	1.03115	1	1	1	FALSE
DANA.112.186.PILER-DF.CENTROID	2	2	0	-0.044253	1.03115	1	1	1	FALSE
DANA.82.116.PILER-DF.CENTROID	2	2	0	-0.044253	1.03115	1	1	1	FALSE
DANA.95.145.PILER-DF.CENTROID	2	2	0	-0.044253	1.03115	1	1	1	FALSE
dana.group.18	2	2	0	-0.044253	1.03115	1	1	1	FALSE
dana.group.4	2	2	0	-0.044253	1.03115	1	1	1	FALSE
dmow.group.1	2	2	0	-0.044253	1.03115	1	1	1	FALSE
DPSE.23.42.PILER-DF.CENTROID	2	2	0	-0.044253	1.03115	1	1	1	FALSE
DPSE.45.97.PILER-DF.CENTROID	2	2	0	-0.044253	1.03115	1	1	1	FALSE
DPSE.6.48.PILER-DF.CENTROID	2	2	0	-0.044253	1.03115	1	1	1	FALSE
dpse.group.2	2	2	0	-0.044253	1.03115	1	1	1	FALSE
dpse.group.3	2	2	0	-0.044253	1.03115	1	1	1	FALSE
dpse.group.4	2	2	0	-0.044253	1.03115	1	1	1	FALSE
DVIR.26.43.PILER-DF.CENTROID	2	2	0	-0.044253	1.03115	1	1	1	FALSE
DVIR.30.66.PILER-DF.CENTROID	2	2	0	-0.044253	1.03115	1	1	1	FALSE
dvir.group.10	2	2	0	-0.044253	1.03115	1	1	1	FALSE
DYAK.12.25.PILER-DF.CENTROID	2	2	0	-0.044253	1.03115	1	1	1	FALSE
DYAK.21.49.PILER-DF.CENTROID	2	2	0	-0.044253	1.03115	1	1	1	FALSE
dyak.group.2	2	2	0	-0.044253	1.03115	1	1	1	FALSE
GYPSY6-I_AG	2	2	0	-0.044253	1.03115	1	1	1	FALSE
IS10	2	2	0	-0.044253	1.03115	1	1	1	FALSE
IVK	84	82	0.0347654	-0.00948754	1.0066	1	1	1	FALSE
OJ.0.90.PILER-DF.CENTROID	2	2	0	-0.044253	1.03115	1	1	1	FALSE
OJ.0.96.PILER-DF.CENTROID	2	2	0	-0.044253	1.03115	1	1	1	FALSE
OJ.0.99.PILER-DF.CENTROID	2	2	0	-0.044253	1.03115	1	1	1	FALSE
OJ.10.24.PILER-DF.CENTROID	2	2	0	-0.044253	1.03115	1	1	1	FALSE
OJ.37.57.PILER-DF.CENTROID	2	2	0	-0.044253	1.03115	1	1	1	FALSE
OJ.7.10.PILER-DF.CENTROID	2	2	0	-0.044253	1.03115	1	1	1	FALSE
R2B	2	2	0	-0.044253	1.03115	1	1	1	FALSE
RSP	2	2	0	-0.044253	1.03115	1	1	1	FALSE
TRANSIB5	2	2	0	-0.044253	1.03115	1	1	1	FALSE
AGAM.110.111.PILER-DF.CENTROID	10	9	0.152003	0.10775	0.928034	1	1	1	FALSE
AGAM.94.83.PILER-DF.CENTROID	3	3	0	-0.044253	1.03115	1	1	1	FALSE
DANA.77.110.PILER-DF.CENTROID	24	24	0	-0.044253	1.03115	1	1	1	FALSE
DVIR.32.76.PILER-DF.CENTROID	3	2	0.584963	0.54071	0.687433	1	1	1	FALSE
DYAK.10.18.PILER-DF.CENTROID	9	9	0	-0.044253	1.03115	1	1	1	FALSE
DYAK.13.30.PILER-DF.CENTROID	3	2	0.584963	0.54071	0.687433	1	1	1	FALSE
DYAK.3.1.PILER-DF.CENTROID	16	15	0.0931094	0.0488565	0.966702	1	1	1	FALSE
HELITRON1_AG	3	2	0.584963	0.54071	0.687433	1	1	1	FALSE
MDG3	12	11	0.125531	0.0812779	0.94522	1	1	1	FALSE
OJ.0.36.PILER-DF.CENTROID	3	2	0.584963	0.54071	0.687433	1	1	1	FALSE

## Sheet: B
Transposable Element	value1 (D. melanogaster)	value2 (Hybrids)	log2(Fold_change)	log2(Fold_change) normalized	Normalized Fold Change	p-value	q-value(Benjamini et al. 1995)	q-value(Storey et al. 2003)	Signature(p-value < 0.001)
1731	10200	3701	1.46258	1.41833	0.374145	0	0	0	TRUE
ACCORD	4630	99565	-4.42655	-4.47081	22.1742	0	0	0	TRUE
BEL	5086	1706	1.57591	1.53166	0.345879	0	0	0	TRUE
COPIA	451603	1908396	-2.07923	-2.12349	4.35746	0	0	0	TRUE
dmel.32.44.centroid	71244	55176	0.368728	0.324475	0.798589	0	0	0	TRUE
MAX	1014	8570	-3.07924	-3.12349	8.71494	0	0	0	TRUE
MDG1	1824	10894	-2.57836	-2.62261	6.15863	0	0	0	TRUE
unmapped	33320304	30754909	0.115585	0.0713319	0.951759	0	0	0	TRUE
BLASTOPIA	1954	4883	-1.32134	-1.36559	2.57682	1.23243e-303	1.98559e-302	1.98559e-302	TRUE
R1	191	1600	-3.06643	-3.11068	8.6379	9.70251e-287	1.40686e-285	1.40686e-285	TRUE
TART_B1	4550	1908	1.25381	1.20955	0.432403	9.80397e-227	1.29234e-225	1.29234e-225	TRUE
TART	9809	5619	0.803793	0.75954	0.590685	2.0744e-225	2.50657e-224	2.50657e-224	TRUE
BLOOD	9592	5492	0.8045	0.760247	0.590395	8.40358e-221	9.37323e-220	9.37323e-220	TRUE
dmel.33.45.centroid	1686	328	2.36184	2.31758	0.200603	8.97413e-211	9.29464e-210	9.29464e-210	TRUE
BATUMI	201	1048	-2.38237	-2.42662	5.37634	2.41318e-144	2.33274e-143	2.33274e-143	TRUE
GYPSY_3	758	1820	-1.26367	-1.30792	2.47585	3.2563e-107	2.95102e-106	2.95102e-106	TRUE
QUASIMODO2	95	618	-2.70161	-2.74586	6.7079	1.70089e-98	1.45076e-97	1.45076e-97	TRUE
R2	182	736	-2.01577	-2.06002	4.16992	1.54527e-83	1.2448e-82	1.2448e-82	TRUE
dsim.group.1	2	277	-7.11374	-7.158	142.814	6.44755e-82	4.9205e-81	4.9205e-81	TRUE
G6	82	502	-2.61399	-2.65824	6.31264	1.22173e-77	8.85754e-77	8.85754e-77	TRUE
DIVER2	38	382	-3.3295	-3.37375	10.3658	4.28747e-75	2.9604e-74	2.9604e-74	TRUE
GYPSY5	5	257	-5.6837	-5.72795	53.0011	4.75536e-71	3.13422e-70	3.13422e-70	TRUE
GYPSY	453	1101	-1.28123	-1.32548	2.50617	6.99162e-67	4.40776e-66	4.40776e-66	TRUE
412	3223	4597	-0.512288	-0.556541	1.47074	2.87802e-64	1.7388e-63	1.7388e-63	TRUE
POGO	628	201	1.64357	1.59932	0.330033	3.42867e-49	1.98863e-48	1.98863e-48	TRUE
CR1A	70	349	-2.3178	-2.36205	5.14101	1.04584e-47	5.83255e-47	5.83255e-47	TRUE
NOMAD	1272	674	0.916278	0.872025	0.546379	1.37218e-38	7.3691e-38	7.3691e-38	TRUE
INVADER6	11	158	-3.84435	-3.8886	14.8111	1.20106e-35	6.21979e-35	6.21979e-35	TRUE
TAHRE	191	30	2.67054	2.62629	0.161961	5.35282e-29	2.67641e-28	2.67641e-28	TRUE
NINJA	158	22	2.84435	2.8001	0.143578	1.00636e-25	4.8641e-25	4.8641e-25	TRUE
HETA	313	103	1.60352	1.55927	0.339324	1.75966e-24	8.23066e-24	8.23066e-24	TRUE
TIRANT	7	94	-3.74723	-3.79149	13.8469	2.03106e-21	9.20326e-21	9.20326e-21	TRUE
297	529	861	-0.702746	-0.746998	1.6783	2.23128e-21	9.80409e-21	9.80409e-21	TRUE
DIVER	788	454	0.795503	0.75125	0.594088	2.55829e-19	1.09103e-18	1.09103e-18	TRUE
MICROPIA	71	213	-1.58496	-1.62922	3.09345	1.2544e-18	5.19678e-18	5.19678e-18	TRUE
dsim.group.2	63	197	-1.64477	-1.68902	3.22439	3.01155e-18	1.21298e-17	1.21298e-17	TRUE
BURDOCK	1300	1715	-0.399697	-0.44395	1.36032	4.66625e-17	1.82866e-16	1.82866e-16	TRUE
BAGGINS1	6	72	-3.58496	-3.62922	12.3738	5.42935e-16	2.07173e-15	2.07173e-15	TRUE
INVADER2	157	321	-1.03181	-1.07606	2.10827	2.78489e-15	1.03541e-14	1.03541e-14	TRUE
TRANSIB2	12	84	-2.80735	-2.85161	7.21804	3.49828e-15	1.26813e-14	1.26813e-14	TRUE
RT1C	2	53	-4.72792	-4.77217	27.3255	2.28989e-14	8.09839e-14	8.09839e-14	TRUE
FW	796	1074	-0.432154	-0.476407	1.39127	1.32033e-12	4.55828e-12	4.55828e-12	TRUE
HETRP	52	4	3.70044	3.65619	0.0793192	1.40568e-11	4.74009e-11	4.74009e-11	TRUE
Bica	279	450	-0.68966	-0.733913	1.66314	1.59497e-11	5.25615e-11	5.25615e-11	TRUE
PROTOP	230	105	1.13124	1.08699	0.470742	3.58908e-11	1.15648e-10	1.15648e-10	TRUE
GYPSY12	198	85	1.21997	1.17571	0.442665	7.98595e-11	2.51731e-10	2.51731e-10	TRUE
HMSBEAGLE	1813	2140	-0.239232	-0.283485	1.21713	7.24033e-10	2.23372e-09	2.23372e-09	TRUE
INVADER4	25	85	-1.76553	-1.80979	3.50591	2.32648e-09	7.02789e-09	7.02789e-09	TRUE
MARINER_DMA	2	35	-4.12928	-4.17354	18.0451	3.54055e-09	1.04772e-08	1.03154e-08	TRUE
IDEFIX	108	208	-0.945552	-0.989805	1.98592	3.55703e-09	1.03154e-08	1.03154e-08	TRUE
GTWIN	129	50	1.36737	1.32312	0.39967	8.22279e-09	2.33785e-08	2.33785e-08	TRUE
HOBO	222	115	0.948926	0.904673	0.534154	2.96187e-08	8.25907e-08	8.25907e-08	TRUE
HELENA	2	30	-3.90689	-3.95114	15.4672	9.18485e-08	2.51284e-07	2.51284e-07	TRUE
INVADER3	97	177	-0.867693	-0.911946	1.88158	3.27819e-07	8.80255e-07	8.80255e-07	TRUE
BS2	74	146	-0.980371	-1.02462	2.03443	3.40488e-07	8.9765e-07	8.9765e-07	TRUE
TRANSPAC	2733	3014	-0.141194	-0.185447	1.13717	1.1189e-06	2.89715e-06	2.89715e-06	TRUE
STALKER4	63	122	-0.953457	-0.99771	1.99683	6.04642e-06	1.53813e-05	1.53813e-05	TRUE
DOC6	1484	1209	0.295677	0.251424	0.840067	7.0173e-06	1.75433e-05	1.75433e-05	TRUE
ROO	3303	2861	0.207257	0.163005	0.893163	9.80105e-06	2.40873e-05	2.40873e-05	TRUE
GYPSY2	6	32	-2.41504	-2.45929	5.49946	1.13537e-05	2.74382e-05	2.74382e-05	TRUE
DOC2	193	274	-0.505575	-0.549828	1.46391	4.49436e-05	0.000106833	0.000106833	TRUE
TABOR	72	126	-0.807355	-0.851608	1.80451	6.18006e-05	0.000144534	0.000144534	TRUE
RT1A	91	43	1.08153	1.03728	0.487246	6.40497e-05	0.000147416	0.000147416	TRUE
Chimpo	19	51	-1.4245	-1.46875	2.76782	6.63845e-05	0.000150402	0.000150402	TRUE
dyak.group.3	546	660	-0.273565	-0.317818	1.24644	0.000142063	0.000316911	0.000316378	TRUE
Chouto	9	33	-1.87447	-1.91872	3.78088	0.000144006	0.000316378	0.000316378	TRUE
PEN1	388	284	0.450166	0.405913	0.754759	0.000326718	0.000707077	0.000707077	TRUE
QUASIMODO	1231	1032	0.254388	0.210135	0.864456	0.000562675	0.00119982	0.00119982	TRUE
dsim.8.8.centroid	2	16	-3	-3.04425	8.24919	0.000618964	0.00130072	0.00130072	TRUE
TC1-2	43	18	1.25634	1.21209	0.431644	0.0020073	0.00415797	0.00415797	FALSE
BS	39	16	1.2854	1.24115	0.423036	0.00283493	0.00578964	0.00578964	FALSE
RT1B	149	101	0.560957	0.516704	0.698967	0.00533997	0.0107541	0.0107541	FALSE
PROTOP_A	49	24	1.02975	0.985494	0.505053	0.00668814	0.0132847	0.0132847	FALSE
dyak.15.37.centroid	59	32	0.882643	0.83839	0.559267	0.00845361	0.0165645	0.0165645	FALSE
GYPSY7	5	17	-1.76553	-1.80979	3.50591	0.00964928	0.0186553	0.0186553	FALSE
GYPSY6	35	16	1.12928	1.08503	0.471382	0.0114472	0.0218401	0.0218401	FALSE
dsim.7.7.centroid	2	11	-2.45943	-2.50368	5.67132	0.011744	0.0221154	0.0221154	FALSE
S	124	85	0.544805	0.500552	0.706836	0.015274	0.0283939	0.0283939	FALSE
FROGGER	4	14	-1.80735	-1.85161	3.60902	0.0176508	0.0323971	0.0323971	FALSE
dsim.4.4.centroid	31	51	-0.718229	-0.762482	1.69641	0.0202515	0.0367059	0.0367059	FALSE
COPIA2	170	126	0.432111	0.387858	0.764263	0.0232877	0.0416878	0.0416878	FALSE
M4	27	12	1.16993	1.12567	0.458288	0.0243361	0.0430334	0.0430334	FALSE
GYPSY8	3	11	-1.87447	-1.91872	3.78088	0.0326998	0.0571262	0.0571262	FALSE
Transib1	8	19	-1.24793	-1.29218	2.44898	0.0334599	0.0577582	0.0577582	FALSE
INVADER1	21	37	-0.817136	-0.861389	1.81679	0.0347339	0.0592519	0.0592519	FALSE
Transib5	2	8	-2	-2.04425	4.1246	0.0616639	0.103968	0.103968	FALSE
I	413	352	0.230566	0.186313	0.878849	0.0764591	0.127432	0.127432	FALSE
PEN2	51	33	0.628031	0.583778	0.667214	0.0803511	0.132397	0.132397	FALSE
PROTOP_B	9	18	-1	-1.04425	2.0623	0.0832994	0.135712	0.135712	FALSE
G4	12	22	-0.874469	-0.918722	1.89044	0.0858747	0.138354	0.138354	FALSE
DOC5	3	9	-1.58496	-1.62922	3.09345	0.0877594	0.139836	0.139836	FALSE
ZAM	11	20	-0.862496	-0.906749	1.87482	0.105996	0.167059	0.167059	FALSE
CIRCE	8	2	2	1.95575	0.257787	0.109788	0.171175	0.171175	FALSE
Gypsy1	35	48	-0.455679	-0.499932	1.41415	0.125001	0.19282	0.19282	FALSE
ACCORD2	39	52	-0.415037	-0.45929	1.37487	0.142537	0.217557	0.217557	FALSE
TC1	54	38	0.50696	0.462707	0.725623	0.14432	0.217983	0.217983	FALSE
ROVER	134	108	0.311202	0.266949	0.831075	0.157547	0.235509	0.235509	FALSE
FW2	2	6	-1.58496	-1.62922	3.09345	0.17334	0.256472	0.256472	FALSE
IVK	72	55	0.388565	0.344312	0.787683	0.184476	0.270191	0.270191	FALSE
FB4	8	14	-0.807355	-0.851608	1.80451	0.204161	0.296034	0.296034	FALSE
G5	71	55	0.368387	0.324134	0.798777	0.213699	0.306796	0.304517	FALSE
DOC3	186	157	0.244538	0.200285	0.870379	0.214212	0.304517	0.304517	FALSE
LOOPER1	3	7	-1.22239	-1.26665	2.40601	0.219873	0.30953	0.30953	FALSE
BARI1	32	22	0.540568	0.496315	0.708915	0.223259	0.311274	0.311274	FALSE
Jockey	675	620	0.122619	0.0783663	0.94713	0.330835	0.456867	0.456867	FALSE
176	711	725	-0.0281314	-0.0723844	1.05145	0.342208	0.468115	0.466613	FALSE
PEN4	7	3	1.22239	1.17814	0.441921	0.344329	0.466613	0.466613	FALSE
Gypsy2	33	40	-0.277534	-0.321787	1.24988	0.351608	0.472066	0.472066	FALSE
TRANSIB3	19	25	-0.395929	-0.440182	1.35678	0.366382	0.487388	0.487388	FALSE
agam.group.17	15	10	0.584963	0.54071	0.687433	0.425729	0.561189	0.561189	FALSE
TOM1	59	49	0.267933	0.22368	0.856378	0.442454	0.57798	0.57798	FALSE
PLACW	77	65	0.244419	0.200166	0.870451	0.450211	0.582863	0.582863	FALSE
ROOA	255	231	0.142604	0.0983514	0.9341	0.468058	0.600606	0.600606	FALSE
GYPSY4	130	117	0.152003	0.10775	0.928034	0.567423	0.721722	0.721722	FALSE
G5A	31	26	0.253757	0.209504	0.864835	0.599107	0.755396	0.755396	FALSE
dyak.group.1	2	3	-0.584963	-0.629215	1.54672	0.682857	0.846276	0.837979	FALSE
NTS	2	3	-0.584963	-0.629215	1.54672	0.682857	0.846276	0.837979	FALSE
S2	2	3	-0.584963	-0.629215	1.54672	0.682857	0.846276	0.837979	FALSE
dsec.12.12.centroid	4	2	1	0.955747	0.515575	0.68772	0.837979	0.837979	FALSE
dgri.169.80.centroid	3	4	-0.415037	-0.45929	1.37487	0.722565	0.869477	0.865884	FALSE
dyak.16.38.centroid	3	4	-0.415037	-0.45929	1.37487	0.722565	0.869477	0.865884	FALSE
GYPSY10	58	53	0.130061	0.0858076	0.942257	0.776466	0.922849	0.922849	FALSE
G	6	7	-0.222392	-0.266645	1.20301	0.787615	0.928489	0.928489	FALSE
G2	52	48	0.115477	0.0712243	0.95183	0.841823	0.984389	0.984389	FALSE
STALKER2	551	531	0.0533405	0.0090875	0.993721	0.92734	1	1	FALSE
DEC1_DS	2	2	0	-0.044253	1.03115	1	1	1	FALSE
DOC4	2	2	0	-0.044253	1.03115	1	1	1	FALSE
dpse.41.89.centroid	2	2	0	-0.044253	1.03115	1	1	1	FALSE
dpse.63.120.centroid	2	2	0	-0.044253	1.03115	1	1	1	FALSE
dyak.12.25.centroid	2	2	0	-0.044253	1.03115	1	1	1	FALSE
dyak.19.46.centroid	2	2	0	-0.044253	1.03115	1	1	1	FALSE
G7	2	2	0	-0.044253	1.03115	1	1	1	FALSE
R1-2	2	2	0	-0.044253	1.03115	1	1	1	FALSE
STALKER3	2	2	0	-0.044253	1.03115	1	1	1	FALSE
ALUII	3	2	0.584963	0.54071	0.687433	1	1	1	FALSE
BS3	3	3	0	-0.044253	1.03115	1	1	1	FALSE
DOC	4	3	0.415037	0.370785	0.773362	1	1	1	FALSE
FW3	3	2	0.584963	0.54071	0.687433	1	1	1	FALSE
G3	3	2	0.584963	0.54071	0.687433	1	1	1	FALSE
GYPSY11	3	2	0.584963	0.54071	0.687433	1	1	1	FALSE
GYPSY6A	4	4	0	-0.044253	1.03115	1	1	1	FALSE
JOCKEY2	3	2	0.584963	0.54071	0.687433	1	1	1	FALSE
RPR	4	4	0	-0.044253	1.03115	1	1	1	FALSE
Transib4	6	5	0.263034	0.218781	0.859291	1	1	1	FALSE
MARINER2	5	5	0	-0.044253	1.03115	1	1	1	FALSE

## Sheet: C
Transposable Element	value1 (D. simulans)	value2 (hybrid)	log2(Fold_change)	log2(Fold_change) normalized	Normalized Fold Change	p-value	q-value(Benjamini et al. 1995)	q-value(Storey et al. 2003)	Signature(p-value < 0.001)
1731	12134	4031	1.58985	1.46687	0.361766	0	0	0	TRUE
412	1023	4204	-2.03896	-2.16193	4.47513	0	0	0	TRUE
ACCORD	9685	87154	-3.16974	-3.29272	9.79955	0	0	0	TRUE
BATUMI	236	1945	-3.04291	-3.16588	8.97483	0	0	0	TRUE
BLOOD	2222	5400	-1.2811	-1.40407	2.64648	0	0	0	TRUE
COPIA	2414	1880159	-9.60521	-9.72819	848.156	0	0	0	TRUE
FLEA	408	4748	-3.54068	-3.66365	12.6727	0	0	0	TRUE
MAX	1766	6700	-1.92368	-2.04665	4.13145	0	0	0	TRUE
MDG1	182	11876	-6.02797	-6.15094	71.0587	0	0	0	TRUE
R1	65	1447	-4.47648	-4.59945	24.2423	0	0	0	TRUE
SPRINGER	83	1932	-4.54084	-4.66381	25.3482	0	0	0	TRUE
TART	251	2199	-3.13109	-3.25406	9.54047	0	0	0	TRUE
TRANSPAC	256	3074	-3.5859	-3.70887	13.0762	0	0	0	TRUE
unmapped	35740131	30820839	0.213639	0.0906663	0.939089	0	0	0	TRUE
176	69	1249	-4.17803	-4.30101	19.712	1.63908e-303	2.4477e-302	2.4477e-302	TRUE
DVIR.6.62.PILER-DF.CENTROID	9	933	-6.69581	-6.81878	112.891	1.40207e-280	1.9629e-279	1.9629e-279	TRUE
TART_B1	203	1450	-2.8365	-2.95947	7.7784	4.5409e-256	5.98331e-255	5.98331e-255	TRUE
DYAK.20.48.PILER-DF.CENTROID	1615	245	2.72068	2.59771	0.165201	1.15779e-222	1.44081e-221	1.44081e-221	TRUE
GYPSY5	136	1029	-2.91956	-3.04254	8.23939	2.14476e-187	2.52856e-186	2.52856e-186	TRUE
RT1C	425	1602	-1.91434	-2.03731	4.1048	1.07451e-182	1.20346e-181	1.20346e-181	TRUE
QUASIMODO	51	719	-3.81742	-3.9404	15.3524	8.07516e-165	8.6135e-164	8.6135e-164	TRUE
CR1	425	1426	-1.74644	-1.86941	3.65384	1.8098e-145	1.84271e-144	1.84271e-144	TRUE
NOMAD	2323	888	1.38736	1.26439	0.416277	3.80189e-121	3.70271e-120	3.70271e-120	TRUE
OSVALDO	732	82	3.15815	3.03518	0.121989	1.2005e-119	1.12046e-118	1.12046e-118	TRUE
FW	48	502	-3.38658	-3.50955	11.3889	3.68943e-105	3.30573e-104	3.30573e-104	TRUE
NTS	313	6	5.70506	5.58208	0.0208749	6.02579e-79	5.19145e-78	5.19145e-78	TRUE
IDEFIX	109	541	-2.3113	-2.43427	5.40492	3.69892e-78	3.06873e-77	3.06873e-77	TRUE
HETA	189	688	-1.86402	-1.98699	3.9641	4.78413e-77	3.82731e-76	3.82731e-76	TRUE
dsim.group.1	3	253	-6.39803	-6.521	91.837	4.50863e-76	3.48253e-75	3.48253e-75	TRUE
3S18	802	1583	-0.980987	-1.10396	2.14944	6.47421e-74	4.83407e-73	4.83407e-73	TRUE
INVADER2	3	245	-6.35168	-6.47465	88.9331	1.48645e-73	1.07408e-72	1.07408e-72	TRUE
POGO	2	230	-6.84549	-6.96846	125.232	1.90901e-70	1.33631e-69	1.33631e-69	TRUE
R2	1002	340	1.55928	1.4363	0.369513	3.22194e-64	2.18701e-63	2.18701e-63	TRUE
INVADER3	42	322	-2.9386	-3.06157	8.34882	3.86187e-60	2.54429e-59	2.54429e-59	TRUE
TOM1	17	223	-3.71344	-3.83641	14.2848	4.25713e-51	2.72457e-50	2.72457e-50	TRUE
ROOA	142	480	-1.75714	-1.88012	3.68105	1.65871e-50	1.03209e-49	1.03209e-49	TRUE
ZAM	23	232	-3.33442	-3.45739	10.9845	7.70591e-49	4.6652e-48	4.6652e-48	TRUE
297	181	522	-1.52806	-1.65103	3.14058	5.61477e-46	3.30976e-45	3.30976e-45	TRUE
TABOR	485	129	1.91061	1.78764	0.289645	3.59739e-43	2.06619e-42	2.06619e-42	TRUE
DGRI.6.273.PILER-DF.CENTROID	16	187	-3.54689	-3.66987	12.7274	1.4758e-41	8.2645e-41	8.2645e-41	TRUE
HMSBEAGLE	126	398	-1.65934	-1.78232	3.43978	3.60994e-39	1.97226e-38	1.97226e-38	TRUE
NINJA	461	143	1.68875	1.56578	0.337795	2.19832e-34	1.17244e-33	1.17244e-33	TRUE
dmow.group.3	76	286	-1.91194	-2.03492	4.09799	5.51116e-34	2.87093e-33	2.87093e-33	TRUE
DANA.69.95.PILER-DF.CENTROID	2	110	-5.78136	-5.90433	59.8937	1.1019e-32	5.60965e-32	5.60965e-32	TRUE
DVIR.3.94.PILER-DF.CENTROID	37	204	-2.46297	-2.58594	6.00409	1.40967e-32	7.01701e-32	6.89848e-32	TRUE
DIVER2	147	397	-1.43332	-1.5563	2.94098	1.41665e-32	6.89848e-32	6.89848e-32	TRUE
TIRANT	2	105	-5.71425	-5.83722	57.1713	4.0022e-31	1.90743e-30	1.90743e-30	TRUE
ACCORD2	31	173	-2.48043	-2.6034	6.07719	7.06121e-28	3.29523e-27	3.29523e-27	TRUE
INVADER4	21	148	-2.81714	-2.94011	7.67469	2.42268e-27	1.10751e-26	1.10751e-26	TRUE
BAGGINS1	82	262	-1.67587	-1.79884	3.47941	9.49184e-27	4.25234e-26	4.25234e-26	TRUE
RT1	23569	23815	-0.01498	-0.137952	1.10034	2.31708e-25	1.0177e-24	1.0177e-24	TRUE
GTWIN	64	225	-1.81378	-1.93675	3.82843	2.38312e-25	1.02658e-24	1.02658e-24	TRUE
OJ.0.64.PILER-DF.CENTROID	184	32	2.52356	2.40059	0.189387	1.44873e-24	6.12294e-24	6.12294e-24	TRUE
dyak.group.1	4589	3372	0.444575	0.321603	0.80018	5.57598e-23	2.313e-22	2.313e-22	TRUE
S	13	93	-2.83872	-2.96169	7.79037	8.46865e-18	3.44905e-17	3.44905e-17	TRUE
DGRI.46.232.PILER-DF.CENTROID	68	2	5.08746	4.96449	0.0320287	3.59629e-17	1.43851e-16	1.43851e-16	TRUE
RT1B	130	280	-1.10692	-1.22989	2.34549	8.73046e-17	3.43092e-16	3.43092e-16	TRUE
GYPSY3	6	71	-3.56478	-3.68776	12.8862	1.0885e-16	4.20384e-16	4.20384e-16	TRUE
INVADER6	124	270	-1.12262	-1.24559	2.37116	1.7634e-16	6.69496e-16	6.69496e-16	TRUE
BS	7	68	-3.28011	-3.40308	10.5786	4.56979e-15	1.70605e-14	1.70605e-14	TRUE
TRANSIB3	2	52	-4.70044	-4.82341	28.3134	9.82403e-15	3.60751e-14	3.60751e-14	TRUE
GYPSY6	14	83	-2.56768	-2.69066	6.45607	1.22572e-14	4.42839e-14	4.42839e-14	TRUE
MARINER2	365	177	1.04415	0.921175	0.528079	8.77264e-13	3.11916e-12	3.11916e-12	TRUE
GYPSY8	56	147	-1.39232	-1.51529	2.85856	2.08861e-12	7.31014e-12	7.31014e-12	TRUE
DOC2	18	79	-2.13386	-2.25683	4.7794	1.27713e-11	4.40118e-11	4.40118e-11	TRUE
GYPSY10	41	116	-1.50043	-1.6234	3.08101	3.91428e-11	1.32848e-10	1.32848e-10	TRUE
BURDOCK	1562	1796	-0.201393	-0.324365	1.25211	7.97866e-11	2.66749e-10	2.66749e-10	TRUE
GYPSY	1691	1924	-0.186232	-0.309205	1.23902	1.26199e-10	4.15715e-10	4.15715e-10	TRUE
J1	13	65	-2.32193	-2.4449	5.44488	1.44432e-10	4.6888e-10	4.6888e-10	TRUE
STALKER2	20	75	-1.90689	-2.02986	4.08366	7.36594e-10	2.3571e-09	2.3571e-09	TRUE
IVK	184	82	1.16601	1.04304	0.485305	1.79547e-08	5.66458e-08	5.66458e-08	TRUE
G7	65	14	2.21501	2.09204	0.234549	2.75206e-08	8.56198e-08	8.56198e-08	TRUE
XDMR	47	109	-1.2136	-1.33657	2.5255	3.23219e-08	9.91796e-08	9.91796e-08	TRUE
HELENA	62	13	2.25376	2.13078	0.228334	4.29889e-08	1.30128e-07	1.30128e-07	TRUE
GYPSY7	7	42	-2.58496	-2.70793	6.53386	5.7782e-08	1.72576e-07	1.72576e-07	TRUE
G4	9	45	-2.32193	-2.4449	5.44488	1.34329e-07	3.95918e-07	3.95918e-07	TRUE
HETRP	2	28	-3.80735	-3.93033	15.2457	2.31594e-07	6.73727e-07	6.73727e-07	TRUE
DSIM.7.7.PILER-DF.CENTROID	12	48	-2	-2.12297	4.35591	4.06256e-07	1.16669e-06	1.16669e-06	TRUE
dvir.group.8	6	36	-2.58496	-2.70793	6.53386	4.90606e-07	1.39109e-06	1.39109e-06	TRUE
GYPSY4	46	99	-1.10579	-1.22877	2.34367	1.02715e-06	2.87602e-06	2.87602e-06	TRUE
COPIA2	176	255	-0.534922	-0.657894	1.57778	2.71597e-06	7.51082e-06	7.51082e-06	TRUE
FW3	6	33	-2.45943	-2.5824	5.98937	2.76177e-06	7.54435e-06	7.54435e-06	TRUE
HAT1	506	615	-0.281449	-0.404422	1.32356	3.00807e-06	8.11818e-06	8.11818e-06	TRUE
dana.group.5	72	129	-0.841302	-0.964275	1.95108	3.78716e-06	1.00991e-05	1.00991e-05	TRUE
agam.group.17	56	108	-0.947533	-1.07051	2.10017	4.66441e-06	1.22921e-05	1.22921e-05	TRUE
SAR	98	158	-0.689071	-0.812043	1.7557	1.05936e-05	2.75926e-05	2.75926e-05	TRUE
DOC3	112	172	-0.61891	-0.741882	1.67236	2.25426e-05	5.80408e-05	5.80408e-05	TRUE
G2	50	95	-0.925999	-1.04897	2.06905	2.70764e-05	6.89219e-05	6.89219e-05	TRUE
GYPSY16-I_AG	2	20	-3.32193	-3.4449	10.8898	4.0006e-05	0.000100127	9.95706e-05	TRUE
S2	2	20	-3.32193	-3.4449	10.8898	4.0006e-05	0.000100127	9.95706e-05	TRUE
dmow.group.6	1259	1345	-0.0953279	-0.2183	1.16336	0.000119994	0.00029537	0.00029537	TRUE
GYPSY2	21	51	-1.28011	-1.40308	2.64466	0.00012457	0.0003033	0.0003033	TRUE
TC1-2	51	17	1.58496	1.46199	0.362992	0.000137623	0.000331479	0.000331479	TRUE
DOC	166	223	-0.42586	-0.548833	1.4629	0.000204649	0.000487674	0.000487674	TRUE
HELITRON2_AG	114	58	0.974909	0.851937	0.554041	0.000228085	0.000537801	0.000537801	TRUE
DIVER	649	480	0.435184	0.312212	0.805406	0.000310712	0.000724995	0.000724995	TRUE
ROO	2264	1859	0.284347	0.161375	0.894173	0.000356316	0.000822832	0.000822832	TRUE
PROTOP_A	79	121	-0.615082	-0.738055	1.66793	0.000381336	0.000871625	0.000871625	TRUE
CIRCE	66	28	1.23704	1.11407	0.46199	0.000411993	0.000932187	0.000932187	TRUE
GYPSY7-I_AG	2	16	-3	-3.12297	8.71181	0.000493748	0.00110599	0.00110599	TRUE
DYAK.10.18.PILER-DF.CENTROID	33	9	1.87447	1.7515	0.296994	0.000545976	0.00121088	0.00121088	TRUE
G5	71	109	-0.618437	-0.74141	1.67181	0.00074748	0.00164153	0.00164153	TRUE
INVADER1	16	38	-1.24793	-1.3709	2.58632	0.000967268	0.00210357	0.00210357	TRUE
DANA.77.110.PILER-DF.CENTROID	7	24	-1.77761	-1.90058	3.73363	0.000995588	0.00214434	0.00214434	TRUE
dpse.group.7	28	7	2	1.87703	0.272244	0.00101145	0.00215776	0.00215776	FALSE
TOM	4	19	-2.24793	-2.3709	5.17264	0.00115992	0.00245115	0.00245115	FALSE
BS2	153	199	-0.379237	-0.502209	1.41638	0.00133679	0.00279851	0.00279851	FALSE
dsim.group.2	90	47	0.937264	0.814292	0.568688	0.00149617	0.00310316	0.00310316	FALSE
FW2	13	32	-1.29956	-1.42253	2.68056	0.00244368	0.00502187	0.00502187	FALSE
G	46	19	1.27563	1.15266	0.449795	0.00270033	0.00549886	0.00549886	FALSE
MARINER_DMA	18	36	-1	-1.12297	2.17795	0.00620047	0.0125127	0.0125127	FALSE
HOBO	192	131	0.551539	0.428567	0.742999	0.00880581	0.0176116	0.0176116	FALSE
DYAK.6.10.PILER-DF.CENTROID	23	7	1.71621	1.59323	0.331428	0.00935557	0.0185455	0.0185455	FALSE
dvir.group.5	46	69	-0.584963	-0.707935	1.63346	0.0114132	0.022426	0.022426	FALSE
DOC6	796	827	-0.0551189	-0.178091	1.13139	0.0129724	0.0252681	0.0252681	FALSE
TRANSIB1	8	20	-1.32193	-1.4449	2.72244	0.0137145	0.0264832	0.0264832	FALSE
dvir.group.9	5	16	-1.67807	-1.80104	3.48472	0.0142243	0.0272329	0.0272329	FALSE
dpse.group.5	2	10	-2.32193	-2.4449	5.44488	0.0182117	0.0345714	0.0345714	FALSE
PROTOP_B	570	451	0.337834	0.214862	0.861629	0.0187747	0.0353405	0.0353405	FALSE
OJ.0.51.PILER-DF.CENTROID	6	17	-1.5025	-1.62547	3.08543	0.0195874	0.0365631	0.0365631	FALSE
GYPSY12A	149	102	0.546743	0.423771	0.745474	0.0228724	0.0423423	0.0423423	FALSE
DOC5	21	36	-0.777608	-0.90058	1.86682	0.023808	0.0437131	0.0433876	FALSE
TRANSIB4	13	26	-1	-1.12297	2.17795	0.0238244	0.0433876	0.0433876	FALSE
BS3	41	58	-0.500429	-0.623401	1.5405	0.0347065	0.0626956	0.0626956	FALSE
MICROPIA	514	538	-0.0658378	-0.18881	1.13982	0.0358192	0.064188	0.064188	FALSE
GYPSY11	47	64	-0.445411	-0.568384	1.48286	0.0456274	0.0811153	0.0811153	FALSE
DANA.88.129.PILER-DF.CENTROID	6	15	-1.32193	-1.4449	2.72244	0.0467369	0.0824336	0.0824336	FALSE
GYPSY12	80	99	-0.307429	-0.430401	1.34761	0.0515559	0.0902228	0.0902228	FALSE
TC1	379	300	0.337235	0.214263	0.861986	0.0548533	0.0952491	0.0952491	FALSE
dpse.group.2	9	2	2.16993	2.04695	0.241995	0.0680638	0.117279	0.117279	FALSE
G5A	197	216	-0.132836	-0.255808	1.194	0.0761514	0.130213	0.130213	FALSE
I	221	170	0.378512	0.255539	0.837674	0.0852873	0.14473	0.14473	FALSE
TLD2	5	12	-1.26303	-1.38601	2.61354	0.0869733	0.146481	0.146481	FALSE
HELITRON	10	3	1.73697	1.61399	0.326693	0.0960865	0.160622	0.160622	FALSE
DERE.10.10.PILER-DF.CENTROID	115	84	0.453173	0.3302	0.795426	0.118528	0.196669	0.196669	FALSE
GYPSY_DS	11	4	1.45943	1.33646	0.395991	0.123454	0.203336	0.203336	FALSE
DVIR.35.83.PILER-DF.CENTROID	49	32	0.61471	0.491737	0.711168	0.148329	0.242523	0.242523	FALSE
FB4	319	260	0.295045	0.172072	0.887567	0.157383	0.255462	0.254853	FALSE
DYAK.3.1.PILER-DF.CENTROID	9	15	-0.736966	-0.859938	1.81496	0.159201	0.256554	0.254853	FALSE
JOCKEY2	21	29	-0.465664	-0.588636	1.50382	0.159283	0.254853	0.254853	FALSE
DANA.26.173.PILER-DF.CENTROID	2	6	-1.58496	-1.70793	3.26693	0.163863	0.259401	0.258488	FALSE
dere.group.1	2	6	-1.58496	-1.70793	3.26693	0.163863	0.259401	0.258488	FALSE
MINOS	4	9	-1.16993	-1.2929	2.4502	0.165788	0.259696	0.259696	FALSE
dana.group.25	10	4	1.32193	1.19896	0.435591	0.185097	0.286933	0.285943	FALSE
OJ.31.44.PILER-DF.CENTROID	10	4	1.32193	1.19896	0.435591	0.185097	0.286933	0.285943	FALSE
BARI1	2	5	-1.32193	-1.4449	2.72244	0.270838	0.414114	0.412706	FALSE
RPR	2	5	-1.32193	-1.4449	2.72244	0.270838	0.414114	0.412706	FALSE
GYPSY6A	5	9	-0.847997	-0.970969	1.96016	0.286836	0.43413	0.434098	FALSE
DANA.95.145.PILER-DF.CENTROID	6	2	1.58496	1.46199	0.362992	0.292629	0.436992	0.434098	FALSE
OJ.0.34.PILER-DF.CENTROID	6	2	1.58496	1.46199	0.362992	0.292629	0.436992	0.434098	FALSE
OJ.10.24.PILER-DF.CENTROID	6	2	1.58496	1.46199	0.362992	0.292629	0.436992	0.434098	FALSE
RP1	14	8	0.807355	0.684382	0.622272	0.295908	0.436075	0.436075	FALSE
DANA.78.111.PILER-DF.CENTROID	3	6	-1	-1.12297	2.17795	0.326453	0.477944	0.477944	FALSE
SAT6	11	15	-0.447459	-0.570431	1.48497	0.333333	0.484848	0.484848	FALSE
G6	17	10	0.765535	0.642562	0.640574	0.335945	0.485495	0.485495	FALSE
DANA.48.51.PILER-DF.CENTROID	65	50	0.378512	0.255539	0.837674	0.352488	0.506136	0.506136	FALSE
TRANSIB2	169	140	0.271596	0.148624	0.902111	0.393114	0.560876	0.560876	FALSE
DPSE.30.63.PILER-DF.CENTROID	9	5	0.847997	0.725024	0.604987	0.42991	0.60757	0.59828	FALSE
GYPSY9	9	5	0.847997	0.725024	0.604987	0.42991	0.60757	0.59828	FALSE
AGAM.164.224.PILER-DF.CENTROID	2	4	-1	-1.12297	2.17795	0.435355	0.603837	0.59828	FALSE
DSIM.8.8.PILER-DF.CENTROID	2	4	-1	-1.12297	2.17795	0.435355	0.603837	0.59828	FALSE
DYAK.1.33.PILER-DF.CENTROID	2	4	-1	-1.12297	2.17795	0.435355	0.603837	0.59828	FALSE
OJ.24.31.PILER-DF.CENTROID	2	4	-1	-1.12297	2.17795	0.435355	0.603837	0.59828	FALSE
DANA.89.131.PILER-DF.CENTROID	5	2	1.32193	1.19896	0.435591	0.456096	0.621067	0.619185	FALSE
OJ.48.87.PILER-DF.CENTROID	5	2	1.32193	1.19896	0.435591	0.456096	0.621067	0.619185	FALSE
P_DG	10	6	0.736966	0.613993	0.653386	0.461115	0.622227	0.622227	FALSE
DANA.138.251.PILER-DF.CENTROID	29	21	0.465664	0.342691	0.788569	0.479602	0.643299	0.643299	FALSE
PROTOP	266	229	0.216079	0.0931062	0.937502	0.499839	0.666452	0.666452	FALSE
AGAM.110.111.PILER-DF.CENTROID	14	9	0.63743	0.514457	0.700056	0.532233	0.705444	0.705444	FALSE
OJ.0.14.PILER-DF.CENTROID	71	72	-0.0201779	-0.14315	1.10431	0.559135	0.736742	0.736742	FALSE
OJ.13.4.PILER-DF.CENTROID	8	5	0.678072	0.555099	0.68061	0.585594	0.767094	0.767094	FALSE
DPSE.52.108.PILER-DF.CENTROID	6	8	-0.415037	-0.53801	1.45197	0.596097	0.776313	0.776313	FALSE
AGAM.94.83.PILER-DF.CENTROID	2	3	-0.584963	-0.707935	1.63346	0.675371	0.866951	0.859563	FALSE
dere.group.2	2	3	-0.584963	-0.707935	1.63346	0.675371	0.866951	0.859563	FALSE
LOOPER1	2	3	-0.584963	-0.707935	1.63346	0.675371	0.866951	0.859563	FALSE
OJ.0.61.PILER-DF.CENTROID	2	3	-0.584963	-0.707935	1.63346	0.675371	0.866951	0.859563	FALSE
AGAM.179.263.PILER-DF.CENTROID	27	28	-0.0524674	-0.17544	1.12931	0.686963	0.869377	0.86246	FALSE
DYAK.12.25.PILER-DF.CENTROID	4	2	1	0.877028	0.544488	0.689198	0.864876	0.86246	FALSE
dyak.group.2	4	2	1	0.877028	0.544488	0.689198	0.864876	0.86246	FALSE
agam.group.37	136	119	0.192645	0.0696726	0.952854	0.707384	0.8803	0.8803	FALSE
HARBINGER1_AG	3	4	-0.415037	-0.53801	1.45197	0.716465	0.886675	0.886675	FALSE
DOC4	20	16	0.321928	0.198956	0.871181	0.740325	0.911169	0.911169	FALSE
MDG3	10	11	-0.137504	-0.260476	1.19787	0.827804	1	1	FALSE
M4	12	12	0	-0.122972	1.08898	0.841472	1	1	FALSE
ULYSSES	58	56	0.0506261	-0.0723464	1.05143	0.851389	1	1	FALSE
1360	2	2	0	-0.122972	1.08898	1	1	1	FALSE
AGAM.98.89.PILER-DF.CENTROID	2	2	0	-0.122972	1.08898	1	1	1	FALSE
BS4	2	2	0	-0.122972	1.08898	1	1	1	FALSE
DANA.112.186.PILER-DF.CENTROID	2	2	0	-0.122972	1.08898	1	1	1	FALSE
DANA.82.116.PILER-DF.CENTROID	2	2	0	-0.122972	1.08898	1	1	1	FALSE
dana.group.1	2	2	0	-0.122972	1.08898	1	1	1	FALSE
dana.group.18	2	2	0	-0.122972	1.08898	1	1	1	FALSE
dana.group.4	2	2	0	-0.122972	1.08898	1	1	1	FALSE
DPSE.17.27.PILER-DF.CENTROID	2	2	0	-0.122972	1.08898	1	1	1	FALSE
DPSE.23.42.PILER-DF.CENTROID	2	2	0	-0.122972	1.08898	1	1	1	FALSE
DPSE.58.115.PILER-DF.CENTROID	2	2	0	-0.122972	1.08898	1	1	1	FALSE
DPSE.6.48.PILER-DF.CENTROID	2	2	0	-0.122972	1.08898	1	1	1	FALSE
dpse.group.4	2	2	0	-0.122972	1.08898	1	1	1	FALSE
DVIR.26.43.PILER-DF.CENTROID	2	2	0	-0.122972	1.08898	1	1	1	FALSE
DVIR.32.76.PILER-DF.CENTROID	2	2	0	-0.122972	1.08898	1	1	1	FALSE
dvir.group.10	2	2	0	-0.122972	1.08898	1	1	1	FALSE
dwil.group.11	2	2	0	-0.122972	1.08898	1	1	1	FALSE
DYAK.13.30.PILER-DF.CENTROID	2	2	0	-0.122972	1.08898	1	1	1	FALSE
DYAK.15.37.PILER-DF.CENTROID	17	15	0.180572	0.0575997	0.960861	1	1	1	FALSE
DYAK.21.49.PILER-DF.CENTROID	2	2	0	-0.122972	1.08898	1	1	1	FALSE
GYPSY6-I_AG	2	2	0	-0.122972	1.08898	1	1	1	FALSE
IS10	2	2	0	-0.122972	1.08898	1	1	1	FALSE
MARINERN12_AG	2	2	0	-0.122972	1.08898	1	1	1	FALSE
OJ.0.90.PILER-DF.CENTROID	2	2	0	-0.122972	1.08898	1	1	1	FALSE
OJ.37.57.PILER-DF.CENTROID	2	2	0	-0.122972	1.08898	1	1	1	FALSE
R1-2	2	2	0	-0.122972	1.08898	1	1	1	FALSE
R2B	2	2	0	-0.122972	1.08898	1	1	1	FALSE
TRAM	2	2	0	-0.122972	1.08898	1	1	1	FALSE
ALUII	19	17	0.160465	0.0374922	0.974347	1	1	1	FALSE
DANA.135.241.PILER-DF.CENTROID	101	92	0.13465	0.011677	0.991939	1	1	1	FALSE
dmow.group.1	3	2	0.584963	0.46199	0.725984	1	1	1	FALSE
DPSE.45.97.PILER-DF.CENTROID	3	2	0.584963	0.46199	0.725984	1	1	1	FALSE
dpse.group.3	3	2	0.584963	0.46199	0.725984	1	1	1	FALSE
G3	12	11	0.125531	0.00255839	0.998228	1	1	1	FALSE
L1-5_CIS	3	3	0	-0.122972	1.08898	1	1	1	FALSE
OJ.0.36.PILER-DF.CENTROID	3	2	0.584963	0.46199	0.725984	1	1	1	FALSE
OJ.0.96.PILER-DF.CENTROID	3	2	0.584963	0.46199	0.725984	1	1	1	FALSE
RSP	3	2	0.584963	0.46199	0.725984	1	1	1	FALSE
TRANSIB5	3	2	0.584963	0.46199	0.725984	1	1	1	FALSE

## Sheet: D
Transposable Element	value1 (D. simulans)	value2 (hybrid)	log2(Fold_change)	log2(Fold_change) normalized	Normalized Fold Change	p-value	q-value(Benjamini et al. 1995)	q-value(Storey et al. 2003)	Signature(p-value < 0.001)
1731	10818	3701	1.54745	1.42447	0.372555	0	0	0	TRUE
412	1132	4597	-2.02182	-2.14479	4.42228	0	0	0	TRUE
ACCORD	15245	99565	-2.7073	-2.83028	7.1121	0	0	0	TRUE
BLASTOPIA	448	4883	-3.4462	-3.56917	11.8694	0	0	0	TRUE
BLOOD	2173	5492	-1.33764	-1.46062	2.75226	0	0	0	TRUE
COPIA	2395	1908396	-9.63812	-9.76109	867.724	0	0	0	TRUE
dmel.32.44.centroid	1245	55176	-5.46982	-5.5928	48.2613	0	0	0	TRUE
dmel.33.45.centroid	2595	328	2.98397	2.86099	0.137643	0	0	0	TRUE
dsim.group.2	4379	197	4.47433	4.35136	0.0489903	0	0	0	TRUE
G6	2993	502	2.57583	2.45286	0.182648	0	0	0	TRUE
GYPSY_3	4	1820	-8.82972	-8.9527	495.484	0	0	0	TRUE
HMSBEAGLE	140	2140	-3.93411	-4.05708	16.6458	0	0	0	TRUE
MAX	1502	8570	-2.51241	-2.63538	6.2134	0	0	0	TRUE
MDG1	123	10894	-6.46873	-6.5917	96.4497	0	0	0	TRUE
R1	17	1600	-6.55639	-6.67937	102.492	0	0	0	TRUE
TART	60	5619	-6.54921	-6.67218	101.983	0	0	0	TRUE
TART_B1	9	1908	-7.72792	-7.85089	230.863	0	0	0	TRUE
TRANSPAC	236	3014	-3.67482	-3.79779	13.9075	0	0	0	TRUE
unmapped	35768180	30754915	0.21786	0.0948872	0.936345	0	0	0	TRUE
QUASIMODO	3	1032	-8.42626	-8.54924	374.608	1.97626258336499e-323	1.38338380835549e-322	1.18575755001899e-322	TRUE
GYPSY	41	1101	-4.74705	-4.87002	29.243	5.00516e-289	3.38444e-288	2.88304e-288	TRUE
FW	38	1074	-4.82085	-4.94382	30.7779	2.6022e-284	1.6796e-283	1.43077e-283	TRUE
176	4	725	-7.50184	-7.62481	197.377	9.64008e-224	5.9517e-223	5.06995e-223	TRUE
BATUMI	141	1048	-2.89387	-3.01684	8.09395	3.16243e-189	1.8711e-188	1.5939e-188	TRUE
ROO	1254	2861	-1.18998	-1.31295	2.4845	1.91418e-173	1.08726e-172	9.26178e-173	TRUE
297	100	861	-3.10601	-3.22899	9.37609	3.54905e-166	1.93833e-165	1.65117e-165	TRUE
dyak.group.3	41	660	-4.00877	-4.13174	17.5299	1.32071e-156	6.94598e-156	5.91693e-156	TRUE
STALKER2	8	531	-6.05257	-6.17554	72.2808	1.2067e-155	6.11969e-155	5.21305e-155	TRUE
QUASIMODO2	36	618	-4.10154	-4.22451	18.6941	3.42006e-149	1.67465e-148	1.42655e-148	TRUE
INVADER2	3	321	-6.74147	-6.86444	116.52	1.60482e-97	7.59614e-97	6.47077e-97	TRUE
NINJA	412	22	4.22707	4.1041	0.0581492	2.63701e-87	1.20792e-86	1.02897e-86	TRUE
BEL	839	1706	-1.02387	-1.14685	2.21429	1.92852e-84	8.55781e-84	7.28997e-84	TRUE
Bica	59	450	-2.93114	-3.05411	8.30575	4.51727e-83	1.9438e-82	1.65582e-82	TRUE
dsim.group.1	5	277	-5.79181	-5.91479	60.3293	1.34085e-80	5.6e-80	4.77036e-80	TRUE
dsec.12.12.centroid	244	2	6.93074	6.80776	0.00892603	1.01429e-65	4.11511e-65	3.50545e-65	TRUE
NTS	247	3	6.3634	6.24043	0.0132264	4.48423e-65	1.76878e-64	1.50673e-64	TRUE
IDEFIX	2	208	-6.70044	-6.82341	113.254	1.71004e-63	6.56287e-63	5.59058e-63	TRUE
POGO	2	201	-6.65105	-6.77402	109.442	2.77438e-61	1.03674e-60	8.83148e-61	TRUE
DIVER2	72	382	-2.4075	-2.53048	5.77762	3.62815e-58	1.32102e-57	1.12531e-57	TRUE
DOC2	43	274	-2.67177	-2.79474	6.93906	6.35329e-47	2.25542e-46	1.92128e-46	TRUE
INVADER3	9	177	-4.29768	-4.42065	21.4165	5.0701e-45	1.75599e-44	1.49584e-44	TRUE
TABOR	467	126	1.89	1.76703	0.293814	4.89991e-41	1.65664e-40	1.41121e-40	TRUE
CR1A	106	349	-1.71916	-1.84214	3.5854	3.29222e-36	1.0872e-35	9.2613e-36	TRUE
GYPSY4	2	117	-5.87036	-5.99334	63.7051	7.16246e-35	2.31152e-34	1.96907e-34	TRUE
COPIA2	5	126	-4.65535	-4.77832	27.4422	5.9029e-34	1.86269e-33	1.58673e-33	TRUE
STALKER4	4	122	-4.93074	-5.05371	33.2138	9.70595e-34	2.99619e-33	2.5523e-33	TRUE
ROOA	49	231	-2.23704	-2.36001	5.13375	5.47707e-33	1.65478e-32	1.40962e-32	TRUE
ROVER	2	108	-5.75489	-5.87786	58.8047	4.63894e-32	1.37235e-31	1.16904e-31	TRUE
HETA	2	103	-5.6865	-5.80947	56.0823	1.68207e-30	4.87458e-30	4.15241e-30	TRUE
TIRANT	2	94	-5.55459	-5.67756	51.1819	1.75801e-27	4.99276e-27	4.25308e-27	TRUE
INVADER4	2	85	-5.40939	-5.53236	46.2815	9.07258e-25	2.50157e-24	2.11047e-24	TRUE
S	2	85	-5.40939	-5.53236	46.2815	9.07258e-25	2.50157e-24	2.11047e-24	TRUE
G	110	7	3.974	3.85103	0.0692985	3.16572e-23	8.48173e-23	7.22516e-23	TRUE
GYPSY12	4	85	-4.40939	-4.53236	23.1407	1.25806e-22	3.30824e-22	2.81812e-22	TRUE
GYPSY5	94	257	-1.45104	-1.57401	2.97731	6.80479e-22	1.75687e-21	1.49659e-21	TRUE
RT1B	11	101	-3.19878	-3.32175	9.99878	2.62665e-21	6.66042e-21	5.67368e-21	TRUE
PROTOP	13	105	-3.01381	-3.13678	8.79558	6.07571e-21	1.5136e-20	1.28936e-20	TRUE
Jockey	380	620	-0.706269	-0.829241	1.77675	3.47178e-19	8.49988e-19	7.24062e-19	TRUE
DOC3	45	157	-1.80277	-1.92574	3.79932	5.08135e-18	1.22297e-17	1.04179e-17	TRUE
HELENA	130	30	2.11548	1.9925	0.251302	1.94428e-14	4.60146e-14	3.91975e-14	TRUE
GTWIN	2	50	-4.64386	-4.76683	27.2244	3.95837e-14	9.21457e-14	7.84943e-14	TRUE
GYPSY10	3	53	-4.14296	-4.26593	19.2386	5.32181e-14	1.21887e-13	1.03829e-13	TRUE
TOM1	2	49	-4.61471	-4.73768	26.6799	7.93881e-14	1.78938e-13	1.52428e-13	TRUE
G2	2	48	-4.58496	-4.70793	26.1354	1.59119e-13	3.50309e-13	2.96115e-13	TRUE
Gypsy1	2	48	-4.58496	-4.70793	26.1354	1.59119e-13	3.50309e-13	2.96115e-13	TRUE
BAGGINS1	11	72	-2.71049	-2.83347	7.12784	2.07211e-13	4.45818e-13	3.79769e-13	TRUE
dsim.4.4.centroid	4	51	-3.67243	-3.7954	13.8844	1.66416e-12	3.52702e-12	3.00449e-12	TRUE
RT1A	2	43	-4.42626	-4.54924	23.413	5.09222e-12	1.06337e-11	9.05835e-12	TRUE
IVK	161	55	1.54956	1.42658	0.372011	1.8447e-11	3.79635e-11	3.23392e-11	TRUE
Gypsy2	2	40	-4.32193	-4.4449	21.7795	4.0329e-11	8.18102e-11	6.96899e-11	TRUE
INVADER6	70	158	-1.1745	-1.29747	2.45797	7.02105e-11	1.40421e-10	1.19618e-10	TRUE
ACCORD2	7	52	-2.89308	-3.01606	8.08954	1.67078e-10	3.29516e-10	2.80698e-10	TRUE
INVADER1	2	37	-4.20945	-4.33243	20.1461	3.16448e-10	6.15557e-10	5.24362e-10	TRUE
PEN1	487	284	0.778031	0.655058	0.63505	7.64154e-10	1.46635e-09	1.24911e-09	TRUE
BURDOCK	1524	1715	-0.170346	-0.293318	1.22546	7.77576e-09	1.47221e-08	1.2541e-08	TRUE
PEN2	2	33	-4.04439	-4.16737	17.9681	8.87664e-09	1.65853e-08	1.41282e-08	TRUE
dyak.15.37.centroid	2	32	-4	-4.12297	17.4236	1.70649e-08	3.12672e-08	2.64642e-08	TRUE
GYPSY2	2	32	-4	-4.12297	17.4236	1.70649e-08	3.12672e-08	2.64642e-08	TRUE
TAHRE	2	30	-3.90689	-4.02986	16.3346	6.29627e-08	1.13174e-07	9.64068e-08	TRUE
G5	15	55	-1.87447	-1.99744	3.99291	2.1374e-07	3.79389e-07	3.23182e-07	TRUE
RT1C	14	53	-1.92057	-2.04354	4.12255	2.24271e-07	3.93166e-07	3.34918e-07	TRUE
TRANSIB3	2	25	-3.64386	-3.76683	13.6122	1.6201e-06	2.80553e-06	2.38989e-06	TRUE
MICROPIA	350	213	0.716501	0.593529	0.66272	1.75114e-06	2.99593e-06	2.55208e-06	TRUE
PROTOP_A	2	24	-3.58496	-3.70793	13.0677	3.08932e-06	5.22242e-06	4.44871e-06	TRUE
TC1	11	38	-1.7885	-1.91147	3.76192	3.78706e-05	6.32662e-05	5.38933e-05	TRUE
ZAM	2	20	-3.32193	-3.4449	10.8898	4.0006e-05	6.60565e-05	5.62702e-05	TRUE
TC1-2	2	18	-3.16993	-3.2929	9.80079	0.000141605	0.000231125	0.000196884	TRUE
GYPSY7	2	17	-3.08746	-3.21044	9.2563	0.000264977	0.000427576	0.00036423	TRUE
DIVER	615	454	0.437894	0.314922	0.803895	0.000426045	0.000679757	0.000579051	TRUE
BS	2	16	-3	-3.12297	8.71181	0.000493748	0.000779024	0.000663611	TRUE
HOBO	75	115	-0.616671	-0.739644	1.66976	0.000605444	0.000944759	0.000804793	TRUE
NOMAD	610	674	-0.143939	-0.266912	1.20323	0.00097386	0.00150313	0.00128044	TRUE
BARI1	6	22	-1.87447	-1.99744	3.99291	0.0011034	0.00167575	0.00141989	FALSE
G4	6	22	-1.87447	-1.99744	3.99291	0.0011034	0.00167575	0.00141989	FALSE
FROGGER	2	14	-2.80735	-2.93033	7.62283	0.00168895	0.00252454	0.00215053	FALSE
GYPSY6	3	16	-2.41504	-2.53801	5.80787	0.00191637	0.00283463	0.00241468	FALSE
DOC6	1164	1209	-0.0547232	-0.177696	1.13108	0.00288086	0.00421734	0.00359254	FALSE
M4	2	12	-2.58496	-2.70793	6.53386	0.00563659	0.00816731	0.00695732	FALSE
G5A	11	26	-1.24101	-1.36398	2.57394	0.00777983	0.0111589	0.00950574	FALSE
MARINER_DMA	18	35	-0.959358	-1.08233	2.11745	0.00877117	0.0124551	0.0106098	FALSE
GYPSY8	2	11	-2.45943	-2.5824	5.98937	0.0101789	0.014311	0.0121908	FALSE
BS2	116	146	-0.331844	-0.454816	1.37061	0.0112173	0.0156162	0.0133027	FALSE
CIRCE	11	2	2.45943	2.33646	0.197996	0.0239879	0.0330707	0.0281713	FALSE
dsim.8.8.centroid	34	16	1.08746	0.96449	0.512459	0.0326952	0.0446415	0.0380278	FALSE
FB4	6	14	-1.22239	-1.34536	2.54094	0.070837	0.0957986	0.081606	FALSE
R2	732	736	-0.00786212	-0.130835	1.09493	0.084666	0.113421	0.0966172	FALSE
LOOPER1	2	7	-1.80735	-1.93033	3.81142	0.0969521	0.128665	0.109604	FALSE
FW2	2	6	-1.58496	-1.70793	3.26693	0.163863	0.215449	0.183531	FALSE
TRANSIB2	110	84	0.389042	0.26607	0.831582	0.221842	0.289005	0.246189	FALSE
dsim.7.7.centroid	6	11	-0.874469	-0.997442	1.99646	0.224752	0.290134	0.247151	FALSE
PLACW	58	65	-0.164387	-0.287359	1.2204	0.279814	0.35796	0.304928	FALSE
DOC5	5	9	-0.847997	-0.970969	1.96016	0.286836	0.363667	0.30979	FALSE
I	354	352	0.00817393	-0.114799	1.08282	0.291809	0.366697	0.312371	FALSE
Transib1	14	19	-0.440573	-0.563545	1.4779	0.298094	0.37131	0.3163	FALSE
MARINER2	9	5	0.847997	0.725024	0.604987	0.42991	0.530846	0.446286	FALSE
GYPSY6A	2	4	-1	-1.12297	2.17795	0.435355	0.52838	0.446286	FALSE
HETRP	2	4	-1	-1.12297	2.17795	0.435355	0.52838	0.446286	FALSE
RPR	2	4	-1	-1.12297	2.17795	0.435355	0.52838	0.446286	FALSE
PROTOP_B	15	18	-0.263034	-0.386007	1.30677	0.488473	0.582884	0.495999	FALSE
Transib4	3	5	-0.736966	-0.859938	1.81496	0.492052	0.582261	0.495999	FALSE
Chimpo	49	51	-0.0577155	-0.180688	1.13342	0.549342	0.644683	0.549173	FALSE
Transib5	6	8	-0.415037	-0.53801	1.45197	0.596097	0.693818	0.591028	FALSE
DOC	2	3	-0.584963	-0.707935	1.63346	0.675371	0.77654	0.658828	FALSE
S2	2	3	-0.584963	-0.707935	1.63346	0.675371	0.77654	0.658828	FALSE
Chouto	32	33	-0.0443941	-0.167367	1.12301	0.709952	0.806505	0.687021	FALSE
DEC1_DS	2	2	0	-0.122972	1.08898	1	1	0.85185	FALSE
dpse.41.89.centroid	2	2	0	-0.122972	1.08898	1	1	0.85185	FALSE
dvir.8.56.centroid	2	2	0	-0.122972	1.08898	1	1	0.85185	FALSE
dyak.12.25.centroid	2	2	0	-0.122972	1.08898	1	1	0.85185	FALSE
dyak.19.46.centroid	2	2	0	-0.122972	1.08898	1	1	0.85185	FALSE
FW3	2	2	0	-0.122972	1.08898	1	1	0.85185	FALSE
G3	2	2	0	-0.122972	1.08898	1	1	0.85185	FALSE
G7	2	2	0	-0.122972	1.08898	1	1	0.85185	FALSE
GYPSY11	2	2	0	-0.122972	1.08898	1	1	0.85185	FALSE
JOCKEY2	2	2	0	-0.122972	1.08898	1	1	0.85185	FALSE
agam.group.17	10	10	0	-0.122972	1.08898	1	1	0.85185	FALSE
BS3	3	3	0	-0.122972	1.08898	1	1	0.85185	FALSE
dgri.169.80.centroid	5	4	0.321928	0.198956	0.871181	1	1	0.85185	FALSE
DOC4	3	2	0.584963	0.46199	0.725984	1	1	0.85185	FALSE
dyak.16.38.centroid	5	4	0.321928	0.198956	0.871181	1	1	0.85185	FALSE
dyak.group.1	4	3	0.415037	0.292065	0.816732	1	1	0.85185	FALSE
PEN4	3	3	0	-0.122972	1.08898	1	1	0.85185	FALSE
