# Supplementary material for: The Hmr and Lhr Hybrid Incompatibility Genes Suppress a Broad Range of Heterochromatic Repeats
Source: PLoS Genet. 2014 Mar 20;10(3):e1004240. doi: 10.1371/journal.pgen.1004240 (PMC3961192; doi:10.1371/journal.pgen.1004240)
Supplement: Table S16 — DEG-seq output measuring the statistical significance of the differences in TE expression between viable Hmr−/Y hybrids and lethal Hmr+/Y dying hybrids. Unique reads were mapped to the individual-insertion and consensus-sequence TE databases, allowing for up to 3 mismatches. (XLSX) [file pgen.1004240.s021.xlsx]

## Sheet: Insertions
Transposable Element	value1 (Lethal hybrid)	value2 (Viable hybrid)	log2(Fold_change)	log2(Fold_change) normalized	Normalized Fold Change	p-value	q-value(Benjamini et al. 1995)	q-value(Storey et al. 2003)	Signature(p-value < 0.001)
ACCORD	87154	14765	2.56139	2.6272	0.161858	0	0	0	TRUE
COPIA	1880159	250281	2.90923	2.97505	0.12718	0	0	0	TRUE
unmapped	30820847	34071492	-0.144659	-0.0788411	1.05617	0	0	0	TRUE
SPRINGER	1932	370	2.3845	2.45032	0.182971	4.4145e-270	2.42797e-268	2.42797e-268	TRUE
FLEA	4748	2580	0.879949	0.945766	0.519154	6.53505e-166	2.87542e-164	2.87542e-164	TRUE
1731	4031	2172	0.892114	0.957931	0.514795	3.80239e-144	1.39421e-142	1.39421e-142	TRUE
TRANSPAC	3074	1634	0.911709	0.977527	0.50785	4.18527e-114	1.31537e-112	1.31537e-112	TRUE
GYPSY5	1029	341	1.5934	1.65922	0.316611	1.51249e-87	4.15935e-86	4.15935e-86	TRUE
176	1249	531	1.23399	1.29981	0.40618	4.54903e-74	1.11199e-72	1.11199e-72	TRUE
BURDOCK	1796	917	0.969794	1.03561	0.487809	5.22795e-74	1.15015e-72	1.15015e-72	TRUE
BATUMI	1945	1052	0.886635	0.952453	0.516753	8.71541e-70	1.74308e-68	1.74308e-68	TRUE
R2	340	37	3.19994	3.26576	0.10397	9.0789e-66	1.66447e-64	1.66447e-64	TRUE
3S18	1583	2791	-0.818121	-0.752303	1.68448	6.34216e-64	1.07329e-62	1.07329e-62	TRUE
MICROPIA	538	167	1.68776	1.75358	0.296566	3.13083e-50	4.91987e-49	4.91987e-49	TRUE
QUASIMODO	719	293	1.29509	1.36091	0.389337	2.23318e-46	3.27533e-45	3.27533e-45	TRUE
RT1	23815	28119	-0.239675	-0.173857	1.12807	9.6418e-43	1.32575e-41	1.32575e-41	TRUE
DIVER2	397	126	1.65572	1.72153	0.303226	1.65407e-36	2.14055e-35	2.14055e-35	TRUE
MAX	6700	5606	0.257189	0.323007	0.799402	2.81765e-35	3.4438e-34	3.4438e-34	TRUE
412	4204	3313	0.343624	0.409442	0.752915	1.4606e-34	1.69122e-33	1.69122e-33	TRUE
297	522	218	1.25972	1.32554	0.399	8.95225e-33	9.84748e-32	9.84748e-32	TRUE
MDG1	11876	10685	0.152462	0.21828	0.85959	7.01931e-30	7.35356e-29	7.35356e-29	TRUE
HAT1	615	300	1.03562	1.10144	0.466051	5.55167e-29	5.55167e-28	5.55167e-28	TRUE
DVIR.6.62.PILER-DF.CENTROID	933	546	0.772976	0.838794	0.559111	5.18605e-28	4.96057e-27	4.96057e-27	TRUE
IDEFIX	541	257	1.07386	1.13968	0.453861	3.9599e-27	3.62991e-26	3.62991e-26	TRUE
dsim.group.1	253	571	-1.17435	-1.10854	2.15627	4.19209e-26	3.68904e-25	3.68904e-25	TRUE
NOMAD	888	547	0.699019	0.764836	0.58852	5.15295e-23	4.36019e-22	4.36019e-22	TRUE
HETA	688	1136	-0.723482	-0.657665	1.57753	1.06941e-21	8.71373e-21	8.71373e-21	TRUE
ACCORD2	173	43	2.00836	2.07418	0.23747	3.57473e-21	2.80872e-20	2.80872e-20	TRUE
DVIR.3.94.PILER-DF.CENTROID	204	62	1.71823	1.78405	0.290368	1.94866e-20	1.47829e-19	1.47829e-19	TRUE
DIVER	480	256	0.906891	0.972708	0.509549	4.44123e-19	3.2569e-18	3.2569e-18	TRUE
DANA.69.95.PILER-DF.CENTROID	110	17	2.6939	2.75971	0.147653	5.21469e-19	3.70075e-18	3.70075e-18	TRUE
TIRANT	105	15	2.80735	2.87317	0.136486	5.8853e-19	4.04614e-18	4.04614e-18	TRUE
GYPSY	1924	1535	0.32587	0.391688	0.762237	1.80234e-15	1.20156e-14	1.20156e-14	TRUE
DGRI.6.273.PILER-DF.CENTROID	187	387	-1.0493	-0.983478	1.97723	3.40454e-15	2.20294e-14	2.20294e-14	TRUE
BAGGINS1	262	131	1	1.06582	0.477702	1.36972e-12	8.60969e-12	8.60969e-12	TRUE
INVADER6	270	142	0.927068	0.992886	0.502472	9.95157e-12	6.08152e-11	6.08152e-11	TRUE
FW	502	770	-0.617171	-0.551354	1.46546	1.80095e-11	1.07083e-10	1.07083e-10	TRUE
CR1	1426	1146	0.315367	0.381185	0.767807	2.46474e-11	1.42695e-10	1.42695e-10	TRUE
HMSBEAGLE	398	245	0.699987	0.765804	0.588125	3.53229e-11	1.99258e-10	1.99258e-10	TRUE
ZAM	232	117	0.987616	1.05343	0.48182	4.13776e-11	2.27577e-10	2.27577e-10	TRUE
INVADER3	322	190	0.761061	0.826879	0.563748	2.01335e-10	1.08033e-09	1.08033e-09	TRUE
ROOA	480	321	0.580461	0.646279	0.638926	4.23402e-10	2.21782e-09	2.21782e-09	TRUE
S	93	30	1.63227	1.69809	0.308195	1.91527e-09	9.79906e-09	9.79906e-09	TRUE
INVADER2	245	138	0.828113	0.893931	0.538146	3.21835e-09	1.60918e-08	1.60918e-08	TRUE
TART	2199	1941	0.180047	0.245865	0.84331	4.37327e-08	2.13804e-07	2.13804e-07	TRUE
COPIA2	255	158	0.690573	0.75639	0.591976	1.59069e-07	7.60765e-07	7.60765e-07	TRUE
SAR	158	84	0.911463	0.977281	0.507936	3.05536e-07	1.43017e-06	1.43017e-06	TRUE
RT1C	1602	1393	0.201679	0.267496	0.83076	4.06691e-07	1.864e-06	1.864e-06	TRUE
HETRP	28	81	-1.5325	-1.46668	2.76385	1.08775e-06	4.88376e-06	4.88376e-06	TRUE
DOC6	827	1076	-0.379719	-0.313901	1.24306	2.5401e-06	1.11764e-05	1.11764e-05	TRUE
DYAK.20.48.PILER-DF.CENTROID	245	373	-0.606394	-0.540576	1.45455	4.30508e-06	1.85709e-05	1.85709e-05	TRUE
dyak.group.1	3372	3155	0.0959645	0.161782	0.89392	6.17272e-06	2.61154e-05	2.56631e-05	TRUE
BS2	199	125	0.67084	0.736658	0.600128	6.18248e-06	2.56631e-05	2.56631e-05	TRUE
FW2	32	6	2.41504	2.48086	0.179138	1.06207e-05	4.32695e-05	4.27021e-05	TRUE
J1	65	25	1.37851	1.44433	0.367463	1.08477e-05	4.33909e-05	4.27021e-05	TRUE
GYPSY10	116	61	0.927244	0.993061	0.502411	1.08696e-05	4.27021e-05	4.27021e-05	TRUE
BLOOD	5400	6134	-0.183869	-0.118051	1.08527	1.14634e-05	4.42448e-05	4.42448e-05	TRUE
R1	1447	1284	0.17242	0.238237	0.847781	1.64401e-05	6.23592e-05	6.13571e-05	TRUE
GYPSY12A	102	52	0.971986	1.0378	0.487069	1.64549e-05	6.13571e-05	6.13571e-05	TRUE
DOC3	172	107	0.684798	0.750615	0.59435	1.95878e-05	7.18218e-05	7.18218e-05	TRUE
GYPSY3	71	32	1.14975	1.21556	0.430605	4.46367e-05	0.000160985	0.000159085	TRUE
BS	68	30	1.18057	1.24639	0.421502	4.4833e-05	0.000159085	0.000159085	TRUE
DANA.77.110.PILER-DF.CENTROID	24	5	2.26303	2.32885	0.199042	0.000257705	0.000899922	0.000899922	TRUE
GYPSY4	99	58	0.771376	0.837193	0.559731	0.000413279	0.00142065	0.00142065	TRUE
DOC	223	163	0.452172	0.517989	0.698344	0.000520446	0.00176151	0.00176151	TRUE
BS3	58	28	1.05063	1.11644	0.461229	0.000729849	0.00243283	0.00243283	TRUE
NTS	6	25	-2.05889	-1.99308	3.98085	0.000958981	0.00314889	0.00314889	TRUE
GYPSY7	42	18	1.22239	1.28821	0.409459	0.00111579	0.0036099	0.0036099	FALSE
XDMR	109	70	0.638901	0.704719	0.613562	0.00128014	0.00408162	0.00408162	FALSE
dvir.group.8	36	15	1.26303	1.32885	0.398085	0.00192401	0.00604687	0.00604687	FALSE
DOC2	79	47	0.749192	0.815009	0.568405	0.00231744	0.00718081	0.00718081	FALSE
RT1B	280	225	0.315502	0.381319	0.767735	0.00327524	0.0100077	0.0100077	FALSE
NINJA	143	103	0.473371	0.539188	0.688158	0.00402908	0.0121424	0.0121424	FALSE
TC1	300	246	0.286304	0.352122	0.783431	0.00469246	0.0139506	0.0139506	FALSE
GYPSY12	99	67	0.563267	0.629085	0.646586	0.00641897	0.018829	0.018829	FALSE
TART_B1	1450	1370	0.081877	0.147695	0.902692	0.00667373	0.0193187	0.0193187	FALSE
TRANSIB2	140	103	0.442782	0.5086	0.702904	0.00694422	0.0198406	0.0198406	FALSE
G4	45	24	0.906891	0.972708	0.509549	0.00770009	0.0217182	0.0217053	FALSE
I	170	130	0.387023	0.452841	0.730603	0.00779419	0.0217053	0.0217053	FALSE
ROO	1859	2115	-0.186131	-0.120313	1.08697	0.00883538	0.0242973	0.0242973	FALSE
AGAM.179.263.PILER-DF.CENTROID	28	12	1.22239	1.28821	0.409459	0.0104607	0.0284119	0.0284119	FALSE
OSVALDO	82	56	0.550197	0.616015	0.652471	0.0135097	0.0362456	0.0362456	FALSE
DOC5	36	19	0.921997	0.987815	0.504241	0.0149774	0.039699	0.039699	FALSE
TRANSIB3	52	31	0.746243	0.812061	0.569568	0.0152154	0.0398498	0.0398498	FALSE
G5A	216	179	0.271072	0.336889	0.791747	0.023404	0.0605751	0.0605751	FALSE
DERE.10.10.PILER-DF.CENTROID	84	61	0.46158	0.527398	0.693805	0.0307265	0.0786028	0.0786028	FALSE
dvir.group.9	16	6	1.41504	1.48086	0.358276	0.0315928	0.0798899	0.0798899	FALSE
GYPSY11	64	44	0.540568	0.606386	0.65684	0.0339822	0.0849556	0.0849556	FALSE
FB4	260	225	0.208587	0.274404	0.826792	0.0367464	0.0908337	0.0908337	FALSE
JOCKEY2	29	16	0.857981	0.923799	0.527119	0.0377082	0.0921756	0.0921756	FALSE
TC1-2	17	7	1.28011	1.34593	0.393402	0.0398036	0.0962285	0.0962285	FALSE
G6	10	3	1.73697	1.80278	0.286621	0.0525567	0.125679	0.125679	FALSE
STALKER2	75	55	0.447459	0.513277	0.700629	0.0531844	0.125813	0.125813	FALSE
DPSE.52.108.PILER-DF.CENTROID	8	2	2	2.06582	0.238851	0.0600294	0.140494	0.140494	FALSE
S2	20	10	1	1.06582	0.477702	0.0664787	0.153951	0.153951	FALSE
GTWIN	225	197	0.191729	0.257547	0.836509	0.0715293	0.163921	0.163921	FALSE
DANA.88.129.PILER-DF.CENTROID	15	7	1.09954	1.16535	0.445855	0.0874975	0.198448	0.198448	FALSE
GYPSY2	51	37	0.462972	0.52879	0.693136	0.0892086	0.200264	0.198772	FALSE
DYAK.10.18.PILER-DF.CENTROID	9	19	-1.078	-1.01218	2.01696	0.0894472	0.198772	0.198772	FALSE
dmow.group.6	1345	1500	-0.157356	-0.0915388	1.06551	0.0914749	0.201245	0.200168	FALSE
SAT6	15	27	-0.847997	-0.782179	1.71973	0.0918953	0.200168	0.200168	FALSE
GYPSY16-I_AG	20	11	0.862496	0.928314	0.525472	0.104866	0.226181	0.226181	FALSE
HOBO	131	111	0.239007	0.304825	0.809541	0.107923	0.230514	0.230514	FALSE
OJ.0.51.PILER-DF.CENTROID	17	9	0.917538	0.983355	0.505802	0.116013	0.245411	0.245411	FALSE
DANA.26.173.PILER-DF.CENTROID	6	14	-1.22239	-1.15657	2.22928	0.117202	0.245566	0.245566	FALSE
dsim.group.2	47	34	0.467126	0.532944	0.691143	0.119226	0.24745	0.24745	FALSE
MARINER_DMA	36	25	0.526069	0.591886	0.663475	0.124763	0.256522	0.256522	FALSE
DANA.48.51.PILER-DF.CENTROID	50	37	0.434403	0.50022	0.706999	0.1328	0.270518	0.270518	FALSE
agam.group.37	119	102	0.222392	0.28821	0.818917	0.139438	0.281434	0.281434	FALSE
TABOR	129	161	-0.31969	-0.253872	1.1924	0.142118	0.284236	0.282674	FALSE
FW3	33	23	0.520832	0.58665	0.665887	0.142622	0.282674	0.282674	FALSE
INVADER4	148	130	0.187086	0.252903	0.839206	0.150105	0.294849	0.294849	FALSE
GYPSY7-I_AG	16	9	0.830075	0.895893	0.537415	0.161595	0.31461	0.31461	FALSE
DANA.78.111.PILER-DF.CENTROID	6	2	1.58496	1.65078	0.318468	0.170511	0.329056	0.329056	FALSE
DANA.138.251.PILER-DF.CENTROID	21	33	-0.652077	-0.586259	1.50135	0.173128	0.331202	0.331202	FALSE
TOM1	223	204	0.128475	0.194292	0.874002	0.175261	0.332391	0.332391	FALSE
HELENA	13	7	0.893085	0.958902	0.514448	0.18134	0.340981	0.340981	FALSE
G2	95	119	-0.324962	-0.259145	1.19677	0.194599	0.362812	0.362812	FALSE
dpse.group.5	10	5	1	1.06582	0.477702	0.201347	0.372237	0.372237	FALSE
PROTOP_B	451	434	0.0554324	0.12125	0.919391	0.213617	0.391631	0.391631	FALSE
HELITRON	3	8	-1.41504	-1.34922	2.54774	0.227903	0.414369	0.414369	FALSE
dvir.group.5	69	58	0.250543	0.316361	0.803093	0.24847	0.448061	0.448061	FALSE
RPR	5	2	1.32193	1.38775	0.382161	0.278615	0.498336	0.498336	FALSE
DVIR.32.76.PILER-DF.CENTROID	2	6	-1.58496	-1.51914	2.86621	0.290086	0.512602	0.510551	FALSE
DYAK.13.30.PILER-DF.CENTROID	2	6	-1.58496	-1.51914	2.86621	0.290086	0.512602	0.510551	FALSE
DSIM.7.7.PILER-DF.CENTROID	48	62	-0.369234	-0.303416	1.23406	0.294707	0.514568	0.514568	FALSE
GYPSY9	5	10	-1	-0.934182	1.91081	0.303663	0.52603	0.52603	FALSE
DYAK.3.1.PILER-DF.CENTROID	15	10	0.584963	0.65078	0.636936	0.318911	0.548129	0.548129	FALSE
DANA.135.241.PILER-DF.CENTROID	92	83	0.148523	0.21434	0.86194	0.326996	0.557667	0.557667	FALSE
dere.group.1	6	3	1	1.06582	0.477702	0.333564	0.564493	0.564493	FALSE
L1-5_CIS	3	7	-1.22239	-1.15657	2.22928	0.345029	0.579438	0.579438	FALSE
GYPSY6	83	100	-0.268817	-0.202999	1.15109	0.375013	0.625022	0.625022	FALSE
TOM	19	14	0.440573	0.50639	0.703982	0.384681	0.636314	0.636314	FALSE
G7	14	20	-0.514573	-0.448756	1.36486	0.395729	0.649705	0.649449	FALSE
G5	109	128	-0.231816	-0.165998	1.12194	0.398525	0.649449	0.649449	FALSE
DYAK.15.37.PILER-DF.CENTROID	15	11	0.447459	0.513277	0.700629	0.434607	0.703041	0.696229	FALSE
AGAM.164.224.PILER-DF.CENTROID	4	2	1	1.06582	0.477702	0.443055	0.703769	0.696229	FALSE
DSIM.8.8.PILER-DF.CENTROID	4	2	1	1.06582	0.477702	0.443055	0.703769	0.696229	FALSE
DYAK.1.33.PILER-DF.CENTROID	4	2	1	1.06582	0.477702	0.443055	0.703769	0.696229	FALSE
GYPSY_DS	4	2	1	1.06582	0.477702	0.443055	0.703769	0.696229	FALSE
DOC4	16	12	0.415037	0.480855	0.716553	0.451153	0.703927	0.701545	FALSE
POGO	230	224	0.0381351	0.103953	0.93048	0.452815	0.701545	0.701545	FALSE
P_DG	6	10	-0.736966	-0.671148	1.59234	0.456402	0.702157	0.702157	FALSE
agam.group.17	108	102	0.0824622	0.14828	0.902326	0.490168	0.748868	0.748716	FALSE
G	19	15	0.341037	0.406854	0.754266	0.493472	0.748716	0.748716	FALSE
OJ.13.4.PILER-DF.CENTROID	5	3	0.736966	0.802783	0.573242	0.498646	0.751385	0.751385	FALSE
GYPSY8	147	142	0.0499252	0.115743	0.922907	0.517664	0.774735	0.774735	FALSE
HARBINGER1_AG	4	7	-0.807355	-0.741537	1.67196	0.55	0.814815	0.812081	FALSE
OJ.24.31.PILER-DF.CENTROID	4	7	-0.807355	-0.741537	1.67196	0.55	0.814815	0.812081	FALSE
INVADER1	38	34	0.160465	0.226282	0.854835	0.556204	0.815766	0.815766	FALSE
AGAM.110.111.PILER-DF.CENTROID	9	7	0.36257	0.428388	0.743092	0.622485	0.906932	0.900972	FALSE
TRANSIB1	20	17	0.234465	0.300283	0.812093	0.62249	0.900972	0.900972	FALSE
RP1	8	11	-0.459432	-0.393614	1.31368	0.649252	0.933565	0.933565	FALSE
MDG3	11	9	0.289507	0.355324	0.781694	0.657931	0.939902	0.93597	FALSE
M4	12	10	0.263034	0.328852	0.79617	0.672324	0.951197	0.93597	FALSE
TLD2	12	10	0.263034	0.328852	0.79617	0.672324	0.951197	0.93597	FALSE
AGAM.94.83.PILER-DF.CENTROID	3	2	0.584963	0.65078	0.636936	0.680705	0.944828	0.93597	FALSE
dere.group.2	3	2	0.584963	0.65078	0.636936	0.680705	0.944828	0.93597	FALSE
LOOPER1	3	2	0.584963	0.65078	0.636936	0.680705	0.944828	0.93597	FALSE
OJ.0.61.PILER-DF.CENTROID	3	2	0.584963	0.65078	0.636936	0.680705	0.944828	0.93597	FALSE
ULYSSES	56	54	0.0524674	0.118285	0.921282	0.703311	0.961046	0.961046	FALSE
OJ.0.14.PILER-DF.CENTROID	72	71	0.0201779	0.0859954	0.942134	0.738522	1	1	FALSE
BARI1	5	7	-0.485427	-0.419609	1.33757	0.775117	1	1	FALSE
DPSE.30.63.PILER-DF.CENTROID	5	7	-0.485427	-0.419609	1.33757	0.775117	1	1	FALSE
TRANSIB4	26	25	0.0565835	0.122401	0.918657	0.781086	1	1	FALSE
dpse.group.7	7	6	0.222392	0.28821	0.818917	0.786418	1	1	FALSE
DYAK.6.10.PILER-DF.CENTROID	7	6	0.222392	0.28821	0.818917	0.786418	1	1	FALSE
CIRCE	28	32	-0.192645	-0.126828	1.09189	0.796717	1	1	FALSE
dmow.group.3	286	306	-0.0975165	-0.0316989	1.02222	0.805238	1	1	FALSE
IVK	82	83	-0.0174874	0.0483301	0.967055	0.876315	1	1	FALSE
PROTOP_A	121	129	-0.092364	-0.0265465	1.01857	0.899455	1	1	FALSE
DVIR.35.83.PILER-DF.CENTROID	32	32	0	0.0658176	0.955404	0.900832	1	1	FALSE
MARINER2	177	183	-0.0480943	0.0177233	0.98779	0.916116	1	1	FALSE
1360	2	2	0	0.0658176	0.955404	1	1	1	FALSE
AGAM.133.158.PILER-DF.CENTROID	2	2	0	0.0658176	0.955404	1	1	1	FALSE
BS4	2	2	0	0.0658176	0.955404	1	1	1	FALSE
DANA.112.186.PILER-DF.CENTROID	2	2	0	0.0658176	0.955404	1	1	1	FALSE
DANA.133.237.PILER-DF.CENTROID	2	2	0	0.0658176	0.955404	1	1	1	FALSE
DANA.82.116.PILER-DF.CENTROID	2	2	0	0.0658176	0.955404	1	1	1	FALSE
DANA.95.145.PILER-DF.CENTROID	2	2	0	0.0658176	0.955404	1	1	1	FALSE
dana.group.18	2	2	0	0.0658176	0.955404	1	1	1	FALSE
dana.group.4	2	2	0	0.0658176	0.955404	1	1	1	FALSE
dana.group.5	129	135	-0.0655883	0.000229222	0.999841	1	1	1	FALSE
DGRI.46.232.PILER-DF.CENTROID	2	2	0	0.0658176	0.955404	1	1	1	FALSE
dmow.group.1	2	2	0	0.0658176	0.955404	1	1	1	FALSE
DPSE.17.27.PILER-DF.CENTROID	2	2	0	0.0658176	0.955404	1	1	1	FALSE
DPSE.23.42.PILER-DF.CENTROID	2	2	0	0.0658176	0.955404	1	1	1	FALSE
DPSE.45.97.PILER-DF.CENTROID	2	2	0	0.0658176	0.955404	1	1	1	FALSE
DPSE.58.115.PILER-DF.CENTROID	2	2	0	0.0658176	0.955404	1	1	1	FALSE
DPSE.6.48.PILER-DF.CENTROID	2	2	0	0.0658176	0.955404	1	1	1	FALSE
dpse.group.2	2	2	0	0.0658176	0.955404	1	1	1	FALSE
dpse.group.4	2	2	0	0.0658176	0.955404	1	1	1	FALSE
DVIR.30.66.PILER-DF.CENTROID	2	2	0	0.0658176	0.955404	1	1	1	FALSE
dvir.group.10	2	2	0	0.0658176	0.955404	1	1	1	FALSE
DYAK.12.25.PILER-DF.CENTROID	2	2	0	0.0658176	0.955404	1	1	1	FALSE
DYAK.21.49.PILER-DF.CENTROID	2	2	0	0.0658176	0.955404	1	1	1	FALSE
dyak.group.2	2	2	0	0.0658176	0.955404	1	1	1	FALSE
G3	11	11	0	0.0658176	0.955404	1	1	1	FALSE
GYPSY6-I_AG	2	2	0	0.0658176	0.955404	1	1	1	FALSE
HELITRON1_AG	2	2	0	0.0658176	0.955404	1	1	1	FALSE
IS10	2	2	0	0.0658176	0.955404	1	1	1	FALSE
MINOS	9	10	-0.152003	-0.0861855	1.06156	1	1	1	FALSE
OJ.0.36.PILER-DF.CENTROID	2	2	0	0.0658176	0.955404	1	1	1	FALSE
OJ.0.90.PILER-DF.CENTROID	2	2	0	0.0658176	0.955404	1	1	1	FALSE
OJ.0.96.PILER-DF.CENTROID	2	2	0	0.0658176	0.955404	1	1	1	FALSE
OJ.0.99.PILER-DF.CENTROID	2	2	0	0.0658176	0.955404	1	1	1	FALSE
OJ.22.29.PILER-DF.CENTROID	2	2	0	0.0658176	0.955404	1	1	1	FALSE
OJ.37.57.PILER-DF.CENTROID	2	2	0	0.0658176	0.955404	1	1	1	FALSE
R2B	2	2	0	0.0658176	0.955404	1	1	1	FALSE
ALUII	17	18	-0.0824622	-0.0166446	1.0116	1	1	1	FALSE
BEL18	2	3	-0.584963	-0.519145	1.43311	1	1	1	FALSE
dana.group.25	4	4	0	0.0658176	0.955404	1	1	1	FALSE
GYPSY6A	9	9	0	0.0658176	0.955404	1	1	1	FALSE
HELITRON2_AG	58	61	-0.0727563	-0.00693878	1.00482	1	1	1	FALSE
OJ.0.34.PILER-DF.CENTROID	2	3	-0.584963	-0.519145	1.43311	1	1	1	FALSE
OJ.0.64.PILER-DF.CENTROID	32	34	-0.0874628	-0.0216453	1.01512	1	1	1	FALSE
OJ.10.24.PILER-DF.CENTROID	2	3	-0.584963	-0.519145	1.43311	1	1	1	FALSE
OJ.31.44.PILER-DF.CENTROID	4	4	0	0.0658176	0.955404	1	1	1	FALSE
PROTOP	229	239	-0.061663	0.00415454	0.997124	1	1	1	FALSE
TRANSIB5	2	3	-0.584963	-0.519145	1.43311	1	1	1	FALSE

## Sheet: Consensus
Transposable Element	value1 (Dying hybrids)	value2 (Living Hybrids)	log2(Fold_change)	log2(Fold_change) normalized	Normalized Fold Change	p-value	q-value(Benjamini et al. 1995)	q-value(Storey et al. 2003)	Signature(p-value < 0.001)
ACCORD	99565	17073	2.54392	2.60974	0.163829	0	0	0	TRUE
COPIA	1908396	254196	2.90835	2.97416	0.127259	0	0	0	TRUE
dmel.32.44.centroid	55176	30061	0.876148	0.941965	0.520523	0	0	0	TRUE
unmapped	30754915	34069577	-0.147667	-0.0818495	1.05837	0	0	0	TRUE
GYPSY_3	1820	339	2.42458	2.4904	0.177957	2.35299e-259	6.6825e-258	6.14684e-258	TRUE
BLASTOPIA	4883	2659	0.876884	0.942702	0.520258	1.09926e-169	2.60159e-168	2.39305e-168	TRUE
R2	736	75	3.29474	3.36056	0.0973577	6.02667e-144	1.22255e-142	1.12456e-142	TRUE
1731	3701	1977	0.904602	0.97042	0.510358	2.5976e-135	4.61074e-134	4.24115e-134	TRUE
TRANSPAC	3014	1602	0.911805	0.977623	0.507816	6.1884e-112	9.76392e-111	8.98125e-111	TRUE
ROO	2861	1641	0.801944	0.867762	0.547996	2.50911e-87	3.56294e-86	3.27734e-86	TRUE
R1	1600	747	1.09889	1.16471	0.446054	1.45594e-79	1.87948e-78	1.72882e-78	TRUE
BURDOCK	1715	871	0.977464	1.04328	0.485223	1.44007e-71	1.70408e-70	1.56748e-70	TRUE
FW	1074	428	1.32731	1.39313	0.380738	8.12898e-71	8.87935e-70	8.16759e-70	TRUE
BEL	1706	2997	-0.812901	-0.747084	1.6784	9.65289e-68	9.79079e-67	9.00597e-67	TRUE
GYPSY12	85	491	-2.53019	-2.46437	5.51886	1.29644e-66	1.2273e-65	1.12892e-65	TRUE
MAX	8570	6789	0.336096	0.401914	0.756854	2.14315e-66	1.90205e-65	1.74958e-65	TRUE
QUASIMODO2	618	180	1.77961	1.84543	0.278273	1.3976e-61	1.16741e-60	1.07383e-60	TRUE
QUASIMODO	1032	469	1.13778	1.2036	0.43419	1.11863e-54	8.82476e-54	8.11737e-54	TRUE
DIVER2	382	87	2.13449	2.2003	0.217592	2.4982e-48	1.86708e-47	1.71742e-47	TRUE
412	4597	3574	0.363153	0.428971	0.742792	6.76316e-41	4.80184e-40	4.41693e-40	TRUE
dmel.33.45.centroid	328	773	-1.23677	-1.17096	2.25161	8.68192e-38	5.87063e-37	5.40005e-37	TRUE
GYPSY5	257	50	2.36177	2.42759	0.185876	6.76555e-37	4.36686e-36	4.01681e-36	TRUE
176	725	342	1.08398	1.1498	0.450687	2.53959e-36	1.56792e-35	1.44224e-35	TRUE
BATUMI	1048	599	0.807011	0.872828	0.546075	2.14756e-33	1.27064e-32	1.16879e-32	TRUE
297	861	457	0.913819	0.979637	0.507107	3.04105e-33	1.72732e-32	1.58886e-32	TRUE
TART	5619	4653	0.272152	0.33797	0.791154	2.22403e-32	1.21467e-31	1.1173e-31	TRUE
dyak.group.3	660	317	1.05798	1.1238	0.458883	4.61954e-32	2.42954e-31	2.23479e-31	TRUE
G6	502	968	-0.94732	-0.881502	1.84229	5.31485e-30	2.69539e-29	2.47933e-29	TRUE
NOMAD	674	356	0.920871	0.986689	0.504635	1.0681e-26	5.22999e-26	4.81076e-26	TRUE
dsim.group.1	277	594	-1.10058	-1.03476	2.04877	2.78194e-24	1.31679e-23	1.21123e-23	TRUE
TIRANT	94	5	4.23266	4.29848	0.0508193	1.72749e-23	7.91303e-23	7.27873e-23	TRUE
MICROPIA	213	60	1.82782	1.89364	0.269128	6.0595e-23	2.6889e-22	2.47336e-22	TRUE
Jockey	620	342	0.858272	0.924089	0.527013	2.494e-22	1.07318e-21	9.87151e-22	TRUE
GYPSY	1101	729	0.594824	0.660641	0.632597	3.13889e-22	1.31095e-21	1.20586e-21	TRUE
MDG1	10894	10036	0.118349	0.184167	0.880157	2.76342e-20	1.12116e-19	1.03129e-19	TRUE
DIVER	454	249	0.866547	0.932364	0.523999	5.885e-17	2.32131e-16	2.13523e-16	TRUE
INVADER2	321	157	1.03181	1.09763	0.467285	8.36441e-16	3.21013e-15	2.9528e-15	TRUE
Bica	450	275	0.710493	0.776311	0.583858	9.80256e-13	3.66306e-12	3.36943e-12	TRUE
IDEFIX	208	94	1.14585	1.21167	0.431769	2.58024e-12	9.39471e-12	8.51027e-12	TRUE
STALKER2	531	344	0.626303	0.692121	0.618943	2.60617e-12	9.25189e-12	8.51027e-12	TRUE
HMSBEAGLE	2140	1833	0.223404	0.289222	0.818343	2.88165e-10	9.98035e-10	9.18034e-10	TRUE
PEN1	284	470	-0.72677	-0.660952	1.58113	6.48166e-10	2.19142e-09	2.01576e-09	TRUE
TAHRE	30	102	-1.76553	-1.69972	3.24837	8.17931e-10	2.70107e-09	2.48456e-09	TRUE
DOC2	274	164	0.74048	0.806298	0.571847	1.05259e-08	3.397e-08	3.1247e-08	TRUE
DOC6	1209	1547	-0.355659	-0.289841	1.22251	1.57487e-07	4.9696e-07	4.57124e-07	TRUE
GYPSY6	16	63	-1.97728	-1.91146	3.7619	1.99091e-07	6.14584e-07	5.6532e-07	TRUE
GYPSY4	117	55	1.08901	1.15482	0.449121	5.2663e-07	1.59109e-06	1.46355e-06	TRUE
Gypsy1	48	12	2	2.06582	0.238851	8.8057e-07	2.60502e-06	2.3962e-06	TRUE
BLOOD	5492	6269	-0.190904	-0.125086	1.09057	2.77796e-06	8.0504e-06	7.40509e-06	TRUE
INVADER6	158	93	0.764622	0.83044	0.562358	8.74752e-06	2.4843e-05	2.28516e-05	TRUE
ACCORD2	52	17	1.61298	1.67879	0.312344	9.5295e-06	2.65331e-05	2.44063e-05	TRUE
CR1A	349	256	0.447083	0.512901	0.700812	1.55436e-05	4.24459e-05	3.90435e-05	TRUE
Gypsy2	40	11	1.8625	1.92831	0.262736	1.79016e-05	4.79628e-05	4.41182e-05	TRUE
INVADER3	177	111	0.67319	0.739007	0.599152	2.01831e-05	5.30742e-05	4.88198e-05	TRUE
DOC3	157	98	0.679911	0.745728	0.596367	5.61478e-05	0.000144963	0.000133343	TRUE
GYPSY10	53	22	1.26849	1.33431	0.396583	0.000178281	0.000452068	0.000415831	TRUE
dsim.7.7.centroid	11	38	-1.7885	-1.72268	3.30049	0.000260674	0.000649397	0.000597342	TRUE
I	352	275	0.356144	0.421961	0.746409	0.000273349	0.000669233	0.000615588	TRUE
GYPSY8	11	37	-1.75002	-1.6842	3.21363	0.000403073	0.000970108	0.000892345	TRUE
GTWIN	50	96	-0.941106	-0.875289	1.83438	0.000467498	0.00110641	0.00101772	TRUE
NTS	3	20	-2.73697	-2.67115	6.36936	0.000523713	0.00121914	0.00112141	TRUE
HELENA	30	9	1.73697	1.80278	0.286621	0.000570763	0.00130723	0.00120244	TRUE
Chimpo	51	24	1.08746	1.15328	0.449602	0.00108687	0.00244978	0.0022534	FALSE
ROVER	108	71	0.60514	0.670958	0.628089	0.00214521	0.00475968	0.00437815	FALSE
HETRP	4	19	-2.24793	-2.18211	4.53817	0.00274636	0.00599974	0.00551881	FALSE
dsim.4.4.centroid	51	90	-0.819428	-0.75361	1.68601	0.00305947	0.00658251	0.00605486	FALSE
BAGGINS1	72	44	0.710493	0.776311	0.583858	0.00513992	0.0108936	0.0100203	FALSE
HETA	103	151	-0.551904	-0.486087	1.40064	0.00833591	0.0174073	0.016012	FALSE
BS2	146	110	0.408465	0.474282	0.719825	0.0102381	0.0210697	0.0193807	FALSE
ZAM	20	8	1.32193	1.38775	0.382161	0.0219118	0.0444496	0.0408866	FALSE
GYPSY2	32	18	0.830075	0.895893	0.537415	0.0341635	0.068327	0.06285	FALSE
TART_B1	1908	2133	-0.160823	-0.0950052	1.06807	0.0377806	0.0745117	0.0685389	FALSE
GYPSY7	17	7	1.28011	1.34593	0.393402	0.0398036	0.0774262	0.0712198	FALSE
G5A	26	14	0.893085	0.958902	0.514448	0.0563662	0.108162	0.099492	FALSE
CIRCE	2	9	-2.16993	-2.10411	4.29932	0.0661842	0.125309	0.115264	FALSE
TABOR	126	159	-0.335603	-0.269785	1.20563	0.123453	0.230662	0.212172	FALSE
S	85	69	0.300866	0.366684	0.775563	0.125666	0.231748	0.213171	FALSE
MARINER_DMA	35	25	0.485427	0.551244	0.682431	0.156238	0.284434	0.261634	FALSE
STALKER4	122	106	0.202817	0.268634	0.830105	0.164625	0.295908	0.272188	FALSE
FW2	6	2	1.58496	1.65078	0.318468	0.170511	0.302657	0.278396	FALSE
dyak.16.38.centroid	4	10	-1.32193	-1.25611	2.38851	0.181153	0.317578	0.292121	FALSE
TOM1	49	38	0.366782	0.4326	0.740925	0.197861	0.342637	0.315171	FALSE
MARINER2	5	11	-1.1375	-1.07169	2.10189	0.212019	0.362731	0.333655	FALSE
LOOPER1	7	3	1.22239	1.28821	0.409459	0.21698	0.366799	0.337397	FALSE
TC1	38	29	0.389947	0.455764	0.729124	0.222158	0.371134	0.341384	FALSE
PEN4	3	8	-1.41504	-1.34922	2.54774	0.227903	0.376305	0.34614	FALSE
PLACW	65	54	0.26748	0.333298	0.79372	0.233265	0.380732	0.350213	FALSE
dsim.group.2	197	182	0.114257	0.180075	0.882657	0.237341	0.382982	0.352282	FALSE
dsim.8.8.centroid	16	10	0.678072	0.743889	0.597127	0.240078	0.383045	0.352341	FALSE
FROGGER	14	22	-0.652077	-0.586259	1.50135	0.2474	0.390342	0.359052	FALSE
TC1-2	18	12	0.584963	0.65078	0.636936	0.273706	0.427101	0.389898	FALSE
G5	55	46	0.257798	0.323615	0.799065	0.274624	0.423876	0.389898	FALSE
Transib4	5	2	1.32193	1.38775	0.382161	0.278615	0.425412	0.390622	FALSE
ROOA	231	267	-0.208947	-0.143129	1.1043	0.282093	0.426141	0.390622	FALSE
TRANSIB3	25	18	0.473931	0.539749	0.687891	0.285519	0.426776	0.390622	FALSE
G2	48	40	0.263034	0.328852	0.79617	0.288855	0.427265	0.390622	FALSE
G3	2	6	-1.58496	-1.51914	2.86621	0.290086	0.424662	0.390622	FALSE
PROTOP	105	127	-0.274439	-0.208622	1.15558	0.293464	0.425223	0.391138	FALSE
TRANSIB2	84	75	0.163499	0.229316	0.853039	0.341362	0.48963	0.450382	FALSE
PEN2	33	43	-0.381871	-0.316053	1.24492	0.360532	0.511955	0.470918	FALSE
Transib1	19	14	0.440573	0.50639	0.703982	0.384681	0.540838	0.497485	FALSE
POGO	201	193	0.0585947	0.124412	0.917378	0.392249	0.546073	0.5023	FALSE
Transib5	8	5	0.678072	0.743889	0.597127	0.414697	0.571718	0.525889	FALSE
BARI1	22	17	0.371969	0.437786	0.738267	0.423659	0.575689	0.527021	FALSE
G4	22	17	0.371969	0.437786	0.738267	0.423659	0.575689	0.527021	FALSE
dgri.169.80.centroid	4	2	1	1.06582	0.477702	0.443055	0.59074	0.540847	FALSE
RPR	4	2	1	1.06582	0.477702	0.443055	0.59074	0.540847	FALSE
PROTOP_A	24	20	0.263034	0.328852	0.79617	0.456115	0.599707	0.551635	FALSE
RT1C	53	48	0.142958	0.208776	0.865271	0.487161	0.63465	0.583777	FALSE
BS	16	21	-0.392317	-0.3265	1.25397	0.515453	0.665403	0.612065	FALSE
NINJA	22	18	0.289507	0.355324	0.781694	0.527551	0.674885	0.620787	FALSE
INVADER1	37	33	0.165059	0.230877	0.852117	0.550723	0.698238	0.642268	FALSE
IVK	55	64	-0.21864	-0.152823	1.11174	0.583246	0.732928	0.674178	FALSE
INVADER4	85	96	-0.175572	-0.109754	1.07904	0.655669	0.816711	0.751244	FALSE
DOC	3	2	0.584963	0.65078	0.636936	0.680705	0.833277	0.759931	FALSE
dyak.group.1	3	2	0.584963	0.65078	0.636936	0.680705	0.833277	0.759931	FALSE
S2	3	2	0.584963	0.65078	0.636936	0.680705	0.833277	0.759931	FALSE
G7	2	4	-1	-0.934182	1.91081	0.687987	0.827917	0.761552	FALSE
FB4	14	12	0.222392	0.28821	0.818917	0.696451	0.831059	0.764442	FALSE
HOBO	115	115	0	0.0658176	0.955404	0.741939	0.877962	0.807585	FALSE
Chouto	33	32	0.0443941	0.110212	0.926452	0.804624	0.94427	0.868378	FALSE
DOC5	9	8	0.169925	0.235743	0.849248	0.811087	0.944053	0.868378	FALSE
RT1B	101	102	-0.0142139	0.0516037	0.964863	0.833302	0.962024	0.880703	FALSE
M4	12	11	0.125531	0.191348	0.875787	0.836085	0.957452	0.880703	FALSE
PROTOP_B	18	20	-0.152003	-0.0861855	1.06156	0.872679	0.991364	0.911897	FALSE
dyak.15.37.centroid	32	32	0	0.0658176	0.955404	0.900832	1	0.919841	FALSE
ALUII	2	2	0	0.0658176	0.955404	1	1	0.919841	FALSE
COPIA2	126	131	-0.0561431	0.00967449	0.993317	1	1	0.919841	FALSE
DEC1_DS	2	2	0	0.0658176	0.955404	1	1	0.919841	FALSE
dpse.41.89.centroid	2	2	0	0.0658176	0.955404	1	1	0.919841	FALSE
dyak.12.25.centroid	2	2	0	0.0658176	0.955404	1	1	0.919841	FALSE
dyak.19.46.centroid	2	2	0	0.0658176	0.955404	1	1	0.919841	FALSE
FW3	2	2	0	0.0658176	0.955404	1	1	0.919841	FALSE
GYPSY11	2	2	0	0.0658176	0.955404	1	1	0.919841	FALSE
JOCKEY2	2	2	0	0.0658176	0.955404	1	1	0.919841	FALSE
agam.group.17	10	11	-0.137504	-0.071686	1.05094	1	1	0.919841	FALSE
BS3	3	4	-0.415037	-0.34922	1.27387	1	1	0.919841	FALSE
dsec.12.12.centroid	2	3	-0.584963	-0.519145	1.43311	1	1	0.919841	FALSE
dsec.7.7.centroid	2	3	-0.584963	-0.519145	1.43311	1	1	0.919841	FALSE
G	7	8	-0.192645	-0.126828	1.09189	1	1	0.919841	FALSE
GYPSY6A	4	5	-0.321928	-0.256111	1.19425	1	1	0.919841	FALSE
RT1A	43	46	-0.0972972	-0.0314796	1.02206	1	1	0.919841	FALSE
